# Supplementary material for: On the importance of equatorial metal-centered excited states in the photophysics of cyclometallated Ir(iii) complexes
Source: Royal Society of Chemistry journal article supplement (doi:10.1039/d3dt01404e), 2023-01-01
Supplement: d3dt01404e1.pdf [file d3dt01404e1.pdf]

Supplementary Information

**On the importance of equatorial metal-centered excited states  
in the photophysics of cyclometallated Ir(III) complexes**

Iván Soriano-Díaz, Enrique Ortí\* and Angelo Giussani\*

Instituto de Ciencia Molecular, Universidad de Valencia, Catedrático José  
Beltrán 2, 46980 Paterna, Spain. E-mail: [angelo.giussani@uv.es](mailto:angelo.giussani@uv.es)

**Table S1** Comparison between the bond distances (in Å) reported by Accorsi, Ortí and coworkers (reference 6) and those computed in this work (data within parentheses) for the coordination sphere of the Ir atom in the  $S_0$ ,  $^3\text{MLCT}$  and  $^3\text{MC}_{ax}$  minima of complexes **1–3**.

|                  | <b>Bond</b>           | <b>(<math>S_0</math>)<sub>min</sub></b> | <b>(<math>^3\text{MLCT}</math>)<sub>min</sub></b> | <b>(<math>^3\text{MC}_{ax}</math>)<sub>min</sub></b> |
|------------------|-----------------------|-----------------------------------------|---------------------------------------------------|------------------------------------------------------|
| <b>Complex 1</b> | Ir–N <sub>1-bpy</sub> | 2.210(2.218)                            | 2.196(2.203)                                      | 2.219(2.229)                                         |
|                  | Ir–N <sub>2-bpy</sub> | 2.210(2.218)                            | 2.196(2.203)                                      | 2.219(2.260)                                         |
|                  | Ir–N <sub>3-ppy</sub> | 2.082(2.090)                            | 2.081(2.090)                                      | 2.505(2.611)                                         |
|                  | Ir–N <sub>6-ppy</sub> | 2.082(2.090)                            | 2.081(2.090)                                      | 2.505(2.293)                                         |
|                  | Ir–C <sub>4-ppy</sub> | 2.024(2.029)                            | 1.999(2.007)                                      | 2.015(2.044)                                         |
|                  | Ir–C <sub>5-ppy</sub> | 2.024(2.029)                            | 1.999(2.007)                                      | 2.015(2.040)                                         |
| <b>Complex 2</b> | Ir–N <sub>1-bpy</sub> | 2.360(2.358)                            | 2.238(2.236)                                      | 2.515(2.297)                                         |
|                  | Ir–N <sub>2-bpy</sub> | 2.207(2.214)                            | 2.226(2.232)                                      | 2.226(2.247)                                         |
|                  | Ir–N <sub>3-ppy</sub> | 2.093(2.099)                            | 2.087(2.095)                                      | 2.204(2.295)                                         |
|                  | Ir–N <sub>6-ppy</sub> | 2.079(2.083)                            | 2.076(2.084)                                      | 2.604(2.646)                                         |
|                  | Ir–C <sub>4-ppy</sub> | 2.013(2.018)                            | 2.018(2.027)                                      | 2.033(2.036)                                         |
|                  | Ir–C <sub>5-ppy</sub> | 2.028(2.034)                            | 1.985(1.992)                                      | 2.042(2.049)                                         |
| <b>Complex 3</b> | Ir–N <sub>1-bpy</sub> | 2.355(2.369)                            | 2.301(2.305)                                      | 2.503(2.456)                                         |
|                  | Ir–N <sub>2-bpy</sub> | 2.345(2.346)                            | 2.233(2.238)                                      | 2.305(2.303)                                         |
|                  | Ir–N <sub>3-ppy</sub> | 2.075(2.085)                            | 2.071(2.083)                                      | 2.209(2.225)                                         |
|                  | Ir–N <sub>6-ppy</sub> | 2.081(2.089)                            | 2.096(2.100)                                      | 2.614(2.623)                                         |
|                  | Ir–C <sub>4-ppy</sub> | 2.019(2.022)                            | 1.990(1.996)                                      | 2.030(2.036)                                         |
|                  | Ir–C <sub>5-ppy</sub> | 2.021(2.026)                            | 2.011(2.020)                                      | 2.050(2.054)                                         |

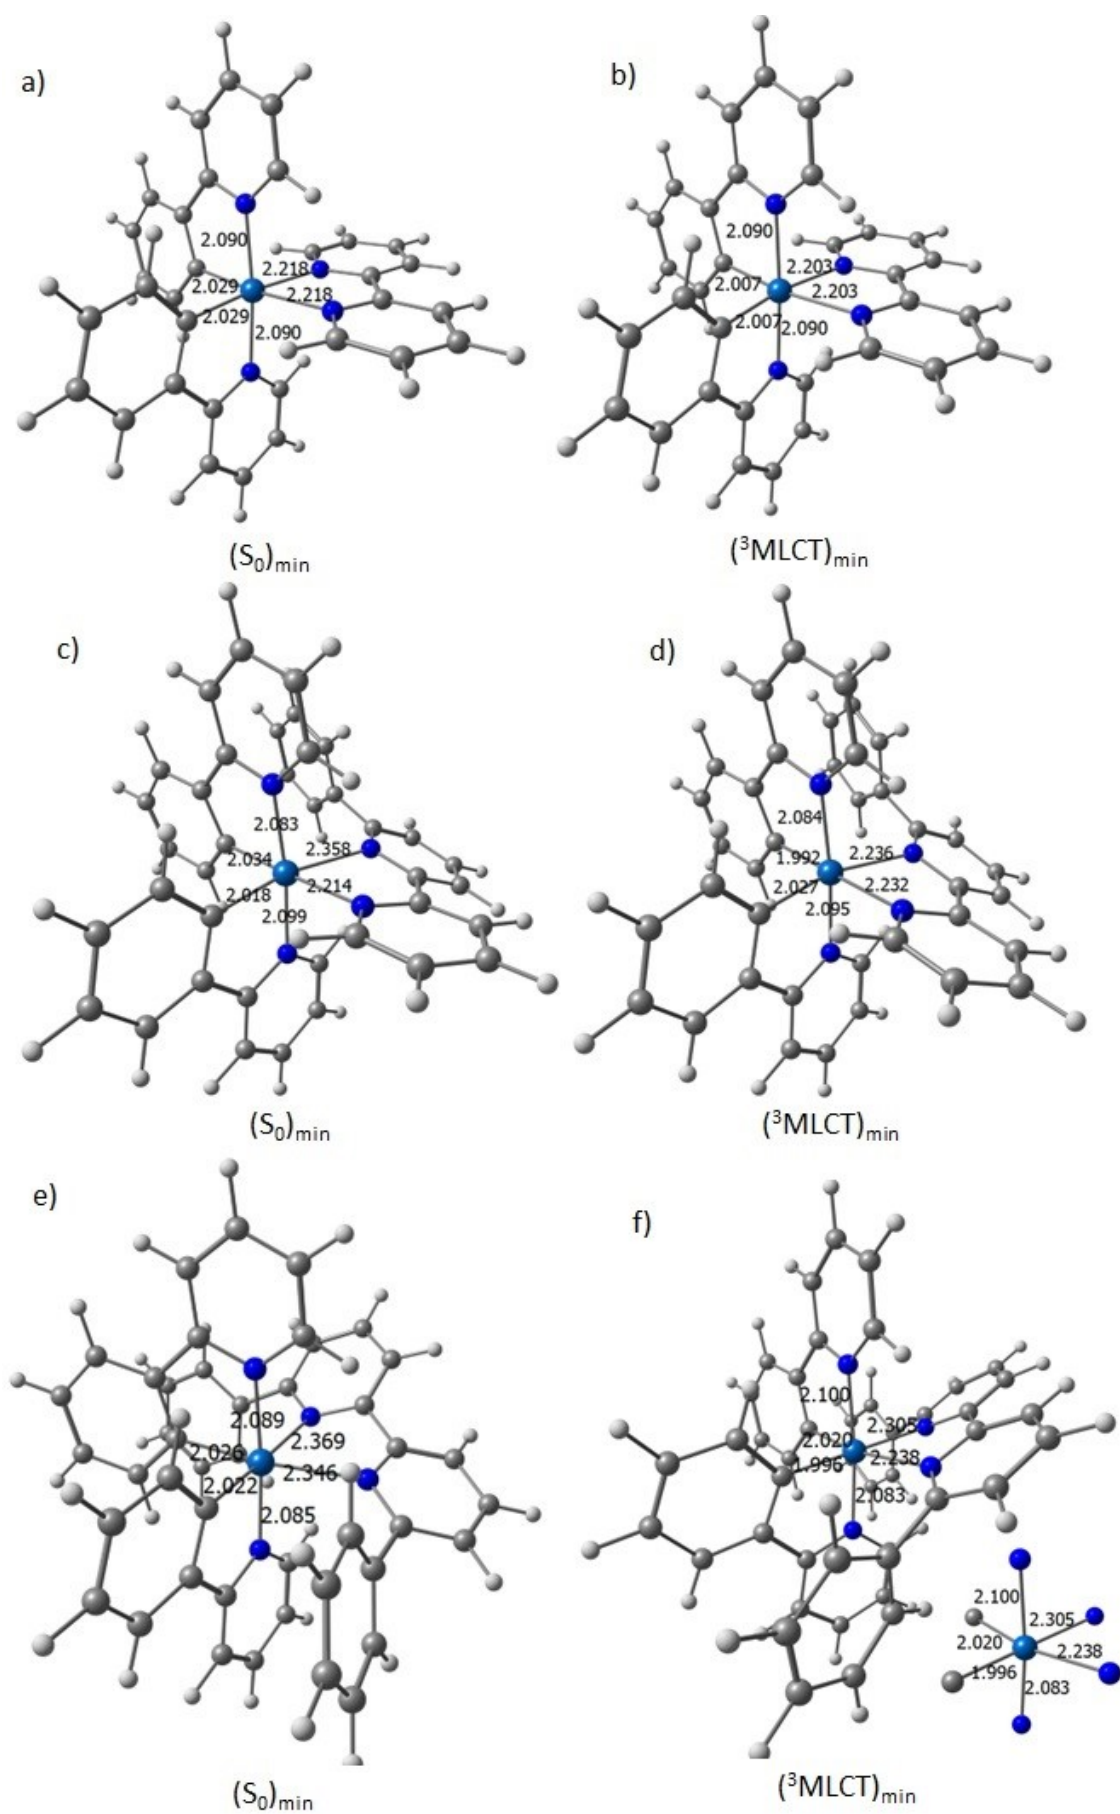

**Fig. S1** B3LYP/DEF2-SVP-CPCM( $\text{CH}_2\text{Cl}_2$ ) ( $S_0$ )<sub>min</sub> and ( ${}^3\text{MLCT}$ )<sub>min</sub> optimized structures calculated for complexes **1** (a and b), **2** (c and d) and **3** (e and f).

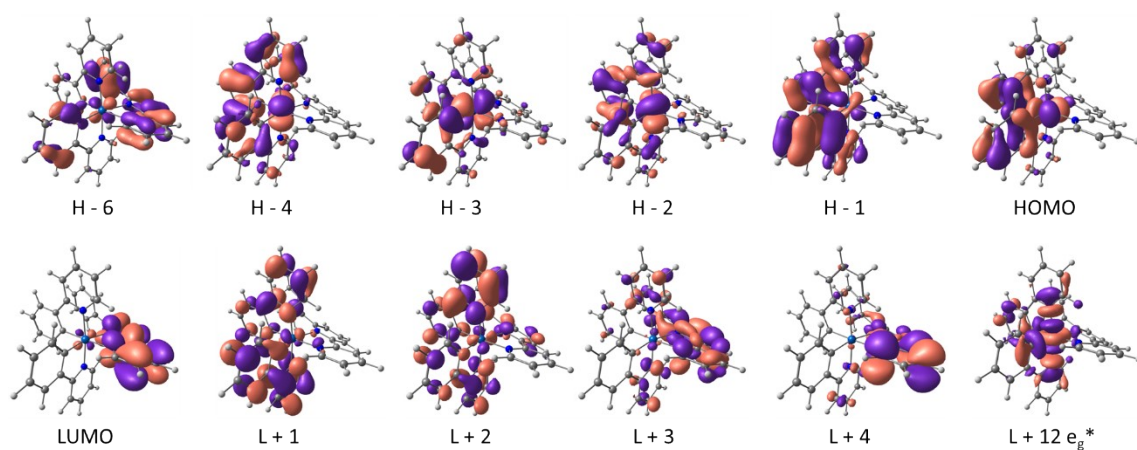

**Fig. S2** Isosurface contour plots ( $\pm 0.03$  a.u.) computed for the MOs of complex **2** at the DFT B3LYP/DEF2-SVP-CPCM(CH<sub>2</sub>Cl<sub>2</sub>) level.

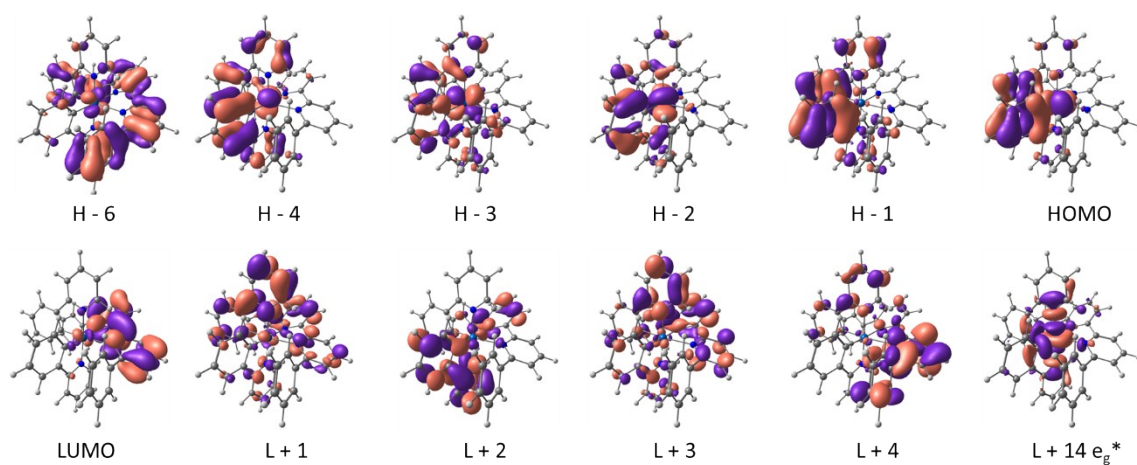

**Fig. S3** Isosurface contour plots ( $\pm 0.03$  a.u.) computed for the MOs of complex **3** at the DFT B3LYP/DEF2-SVP-CPCM(CH<sub>2</sub>Cl<sub>2</sub>) level.

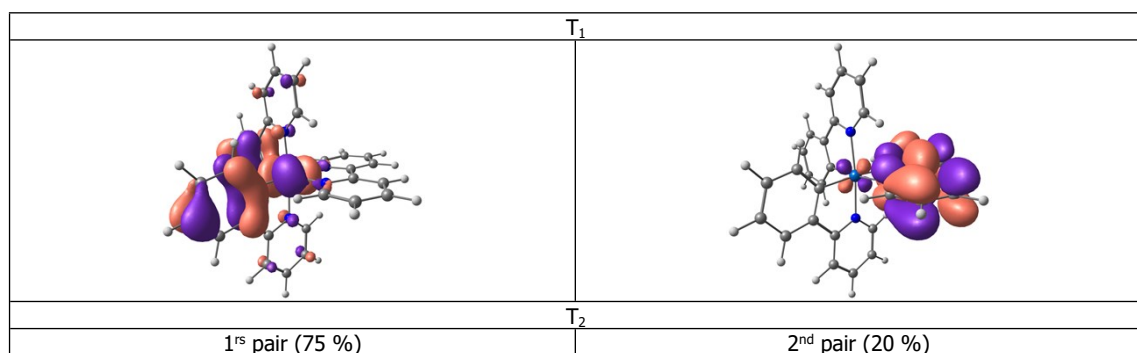

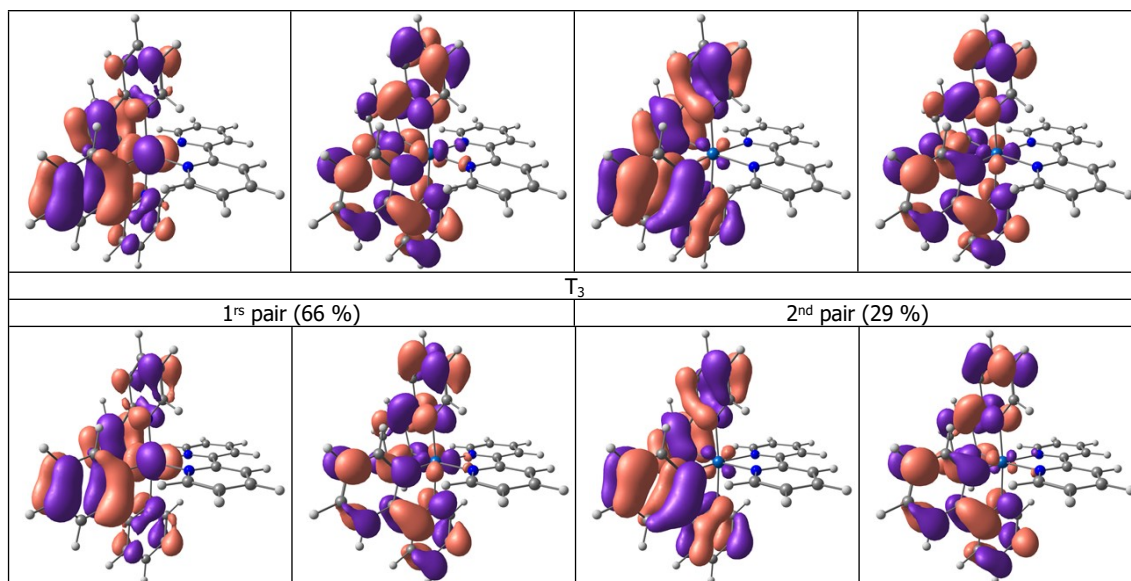

**Fig. S4** Isosurface contour plots ( $\pm 0.03$  a.u.) of the NTO pairs describing the electronic transitions to the three lowest triplet excited states ( $T_1$  to  $T_3$ ) computed for complex **1** at the DFT B3LYP/DEF2-SVP-PCM( $\text{CH}_2\text{Cl}_2$ ) level using the  $(S_0)_{\text{min}}$  geometry.

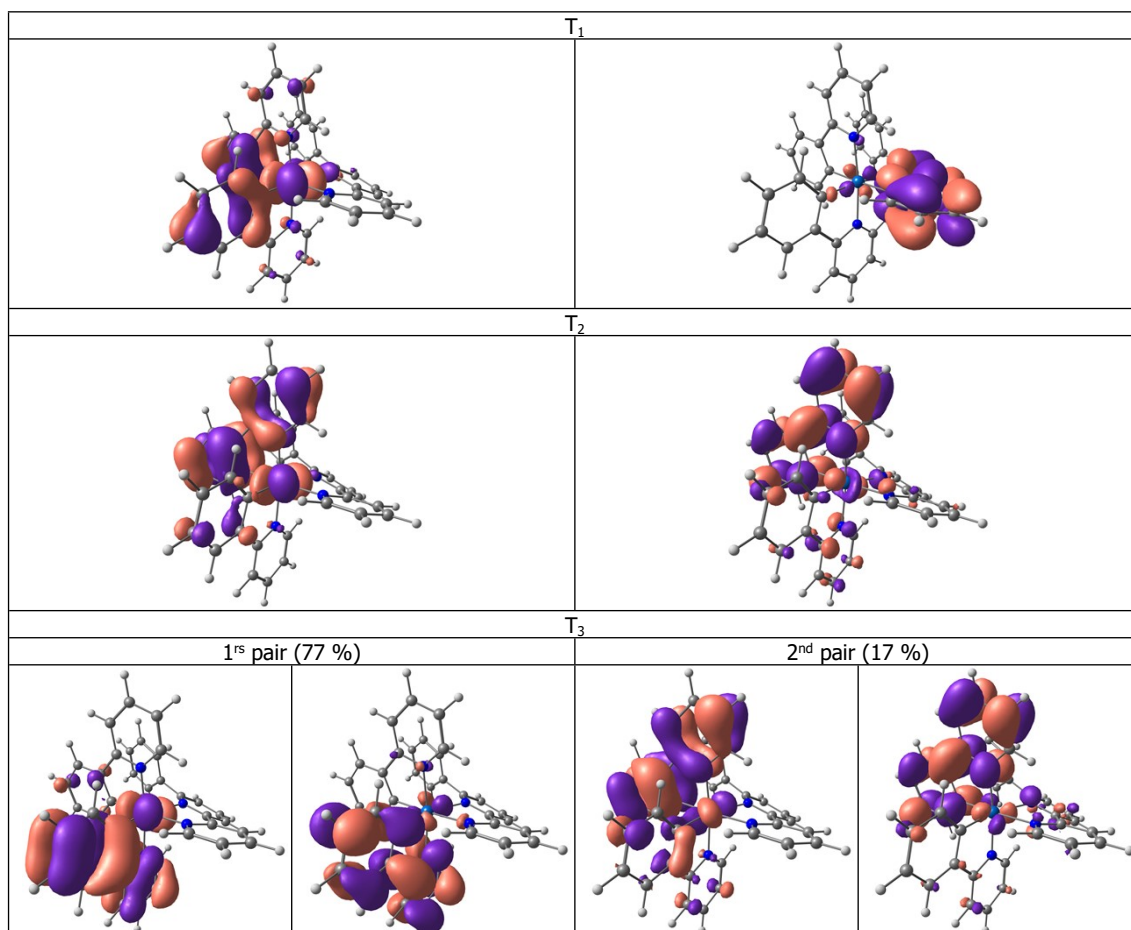

**Fig. S5** Isosurface contour plots ( $\pm 0.03$  a.u.) of the NTO pairs describing the electronic transitions to the three lowest triplet excited states ( $T_1$  to  $T_3$ ) computed for complex **2** at the DFT B3LYP/DEF2-SVP-CPCM( $\text{CH}_2\text{Cl}_2$ ) level using the  $(S_0)_{\text{min}}$  geometry.

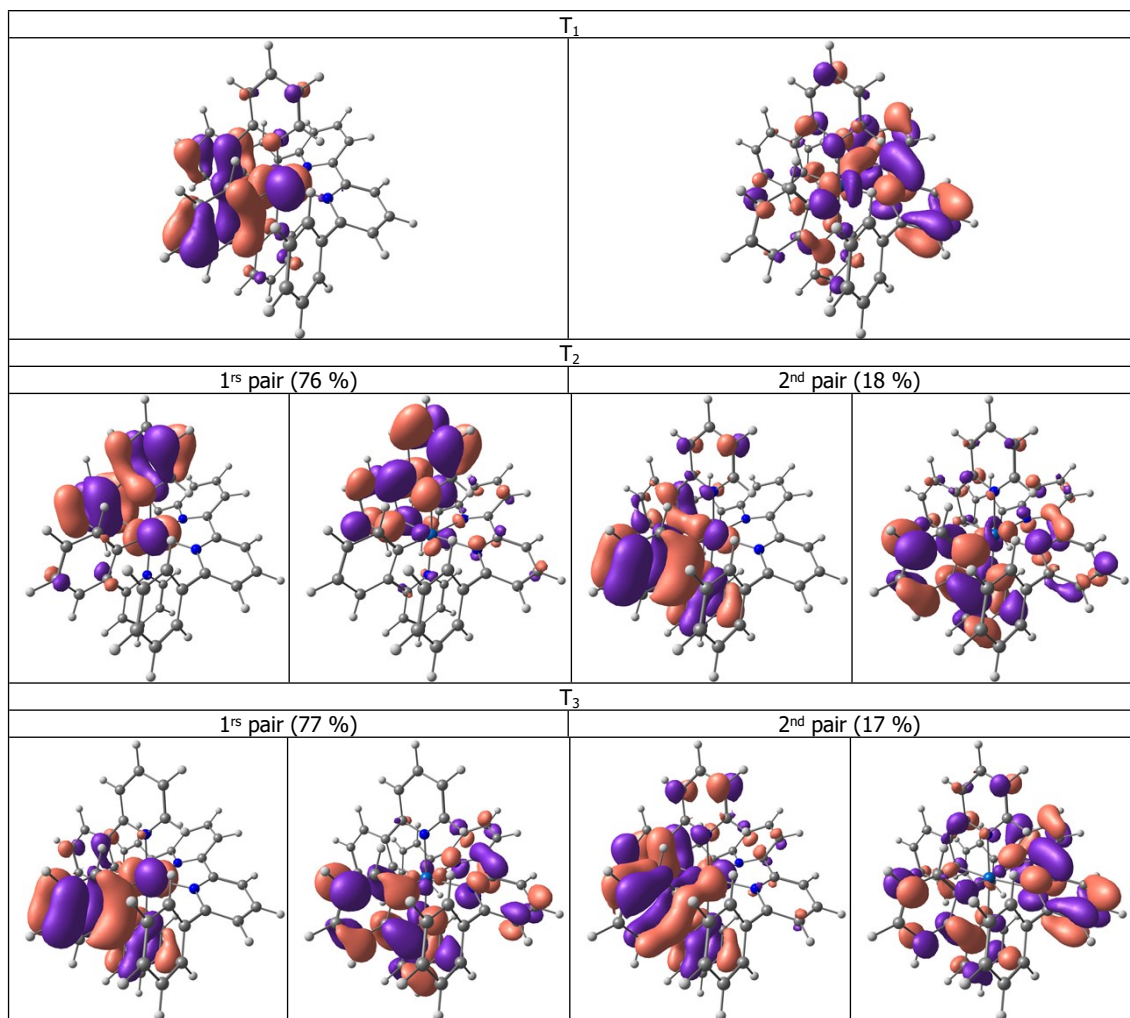

**Fig. S6** Isosurface contour plots ( $\pm 0.03$  a.u.) of the NTO pairs describing the electronic transitions to the three lowest triplet excited states (T<sub>1</sub> to T<sub>3</sub>) computed for complex **3** at the DFT B3LYP/DEF2-SVP-PCM(CH<sub>2</sub>Cl<sub>2</sub>) level using the (S<sub>0</sub>)<sub>min</sub> geometry.

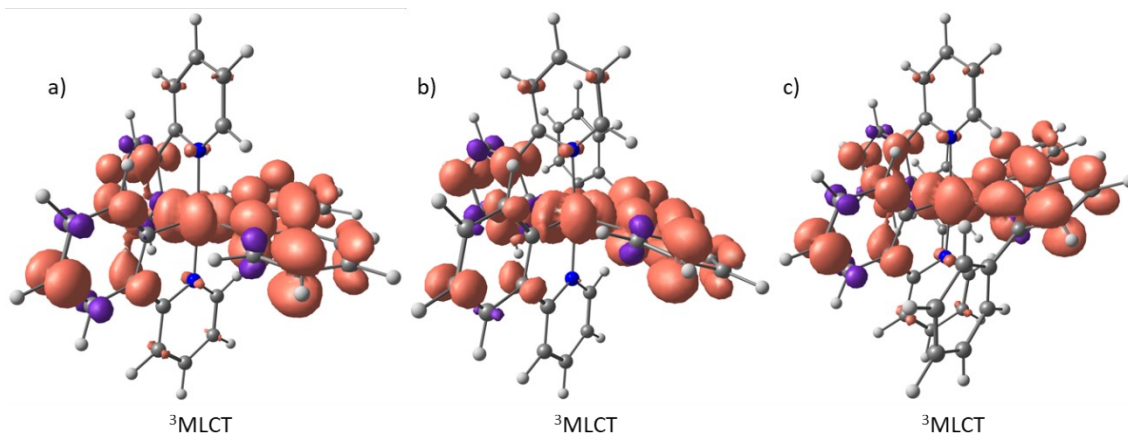

**Fig. S7** B3LYP/DEF2-SVP-CPCM(CH<sub>2</sub>Cl<sub>2</sub>) isosurface contour plots ( $\pm 0.004$  a.u.) of the unpaired-electron spin density computed at the (<sup>3</sup>MLCT)<sub>min</sub> for complex **1** (a), **2** (b) and **3** (c).

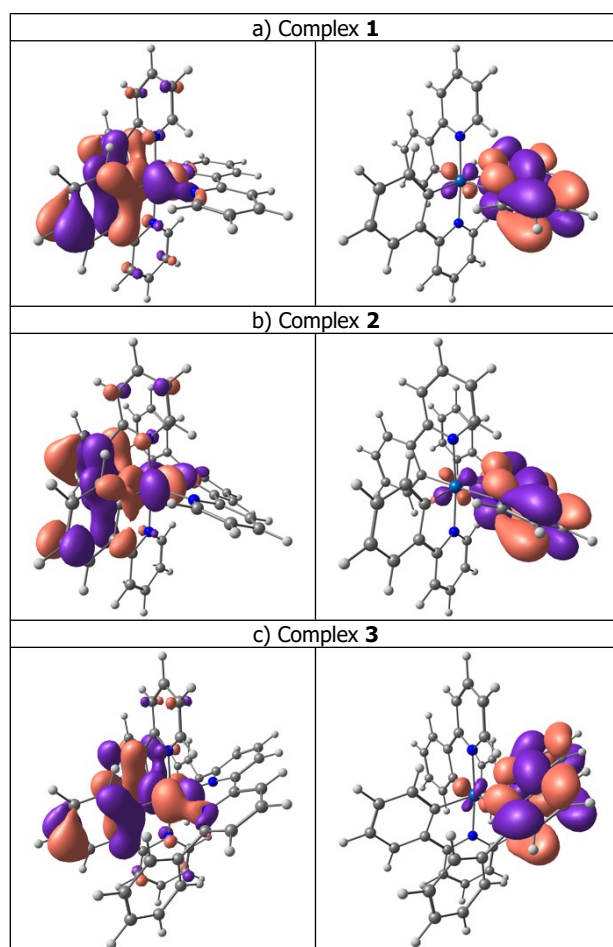

**Fig. S8** B3LYP/DEF2-SVP-PCM(CH<sub>2</sub>Cl<sub>2</sub>) isosurface contour plots ( $\pm 0.03$  a.u.) of the NTO pairs describing the electronic transition to the T<sub>1</sub> triplet computed at the optimized <sup>3</sup>MLCT minima of complexes **1** (a), **2** (b) and **3** (c).

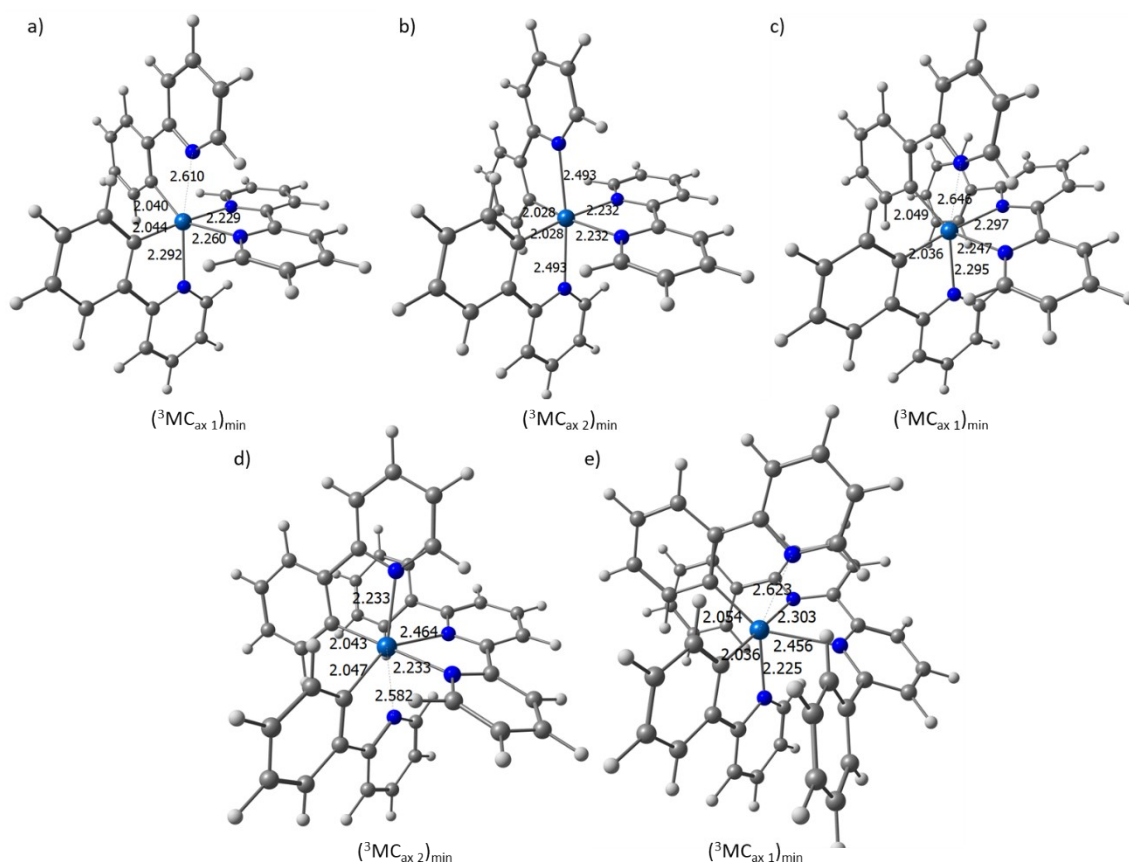

**Fig. S9** B3LYP/DEF2-SVP-CPCM(CH<sub>2</sub>Cl<sub>2</sub>) optimized <sup>3</sup>MC<sub>ax</sub> minima calculated for complexes **1** (a and b), **2** (c and d) and **3** (e).

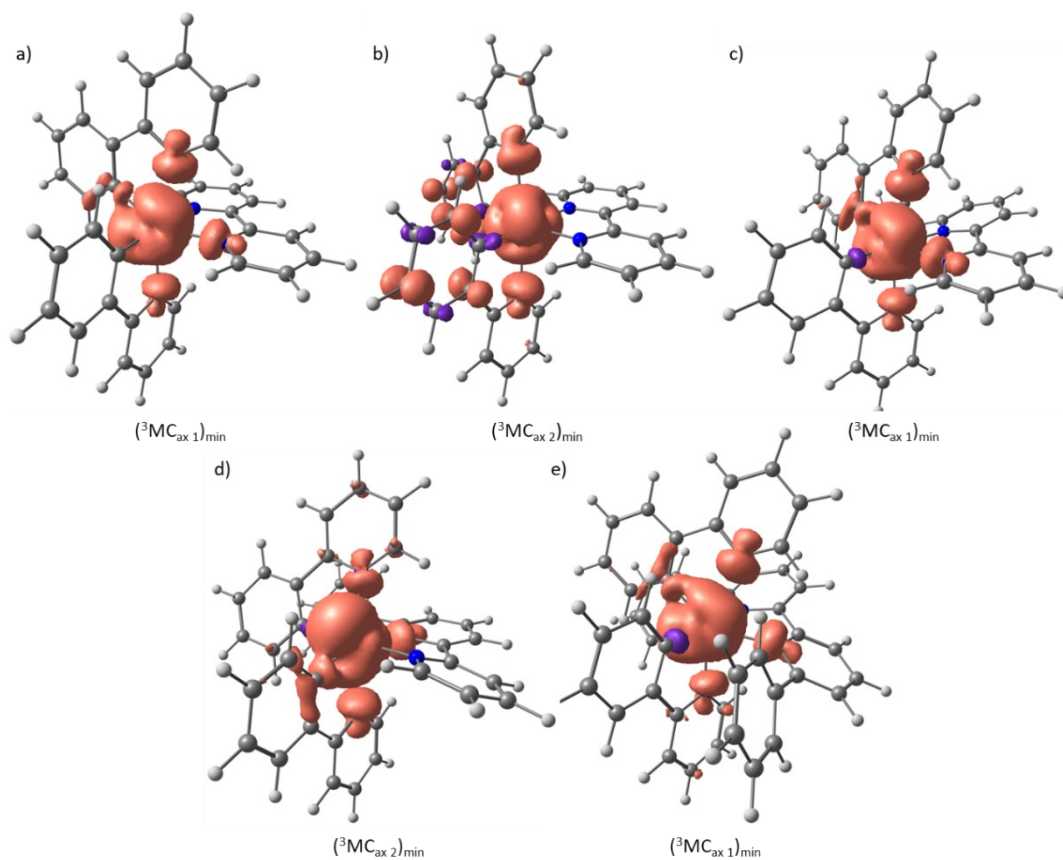

**Fig. S10** B3LYP/DEF2-SVP-CPCM(CH<sub>2</sub>Cl<sub>2</sub>) isosurface contour plots ( $\pm 0.004$  a.u.) of the unpaired-electron spin density computed at the optimized <sup>3</sup>MC<sub>ax</sub> minima for complex **1** (a and b), **2** (c and d) and **3** (e).



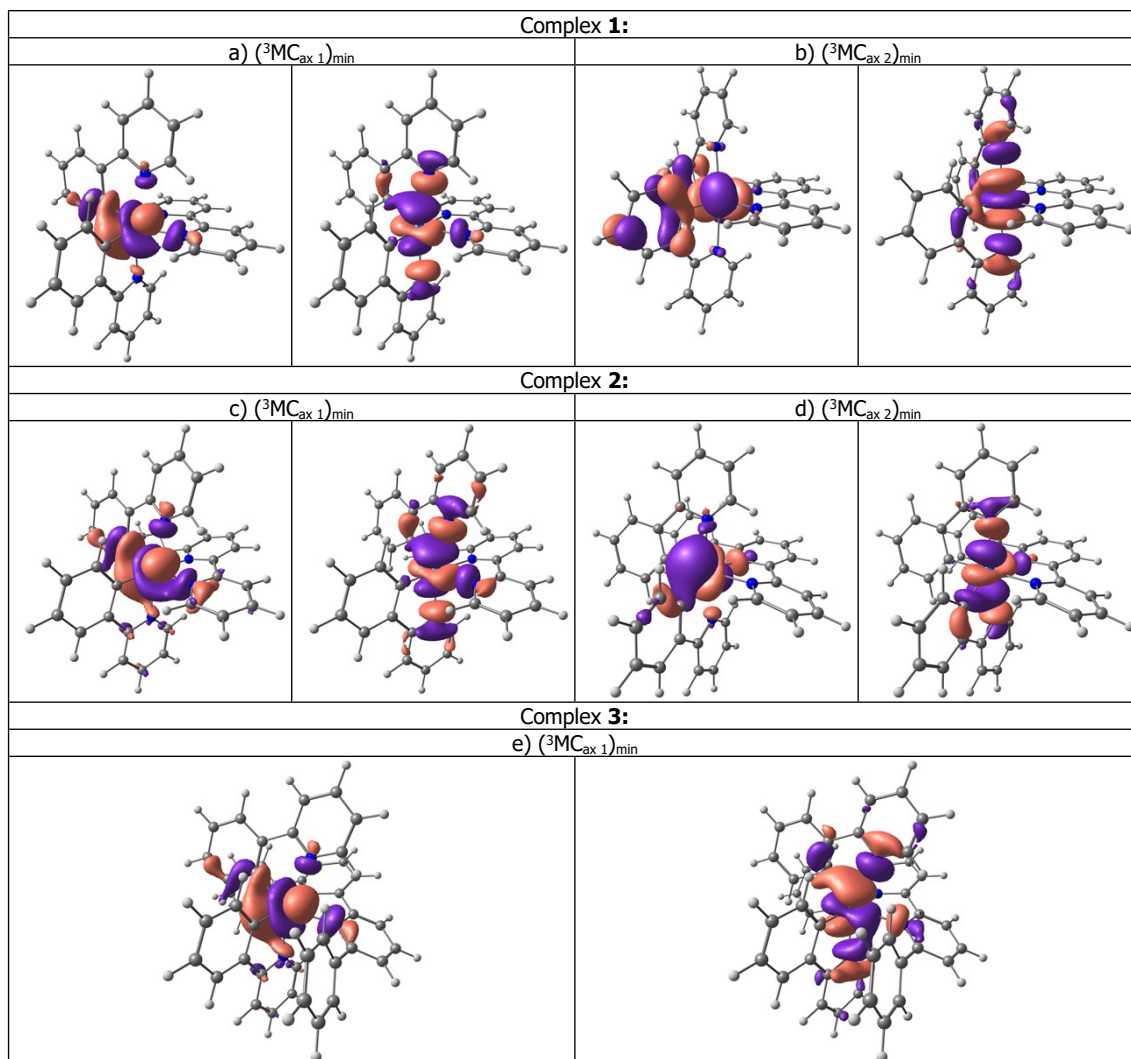

**Fig. S11** B3LYP/DEF2-SVP-PCM( $\text{CH}_2\text{Cl}_2$ ) isosurface contour plots ( $\pm 0.03$  a.u.) of the NTO pairs computed at the optimized  ${}^3\text{MC}_{\text{ax}}$  minima of complexes **1** (a and b), **2** (c and d) and **3** (e).

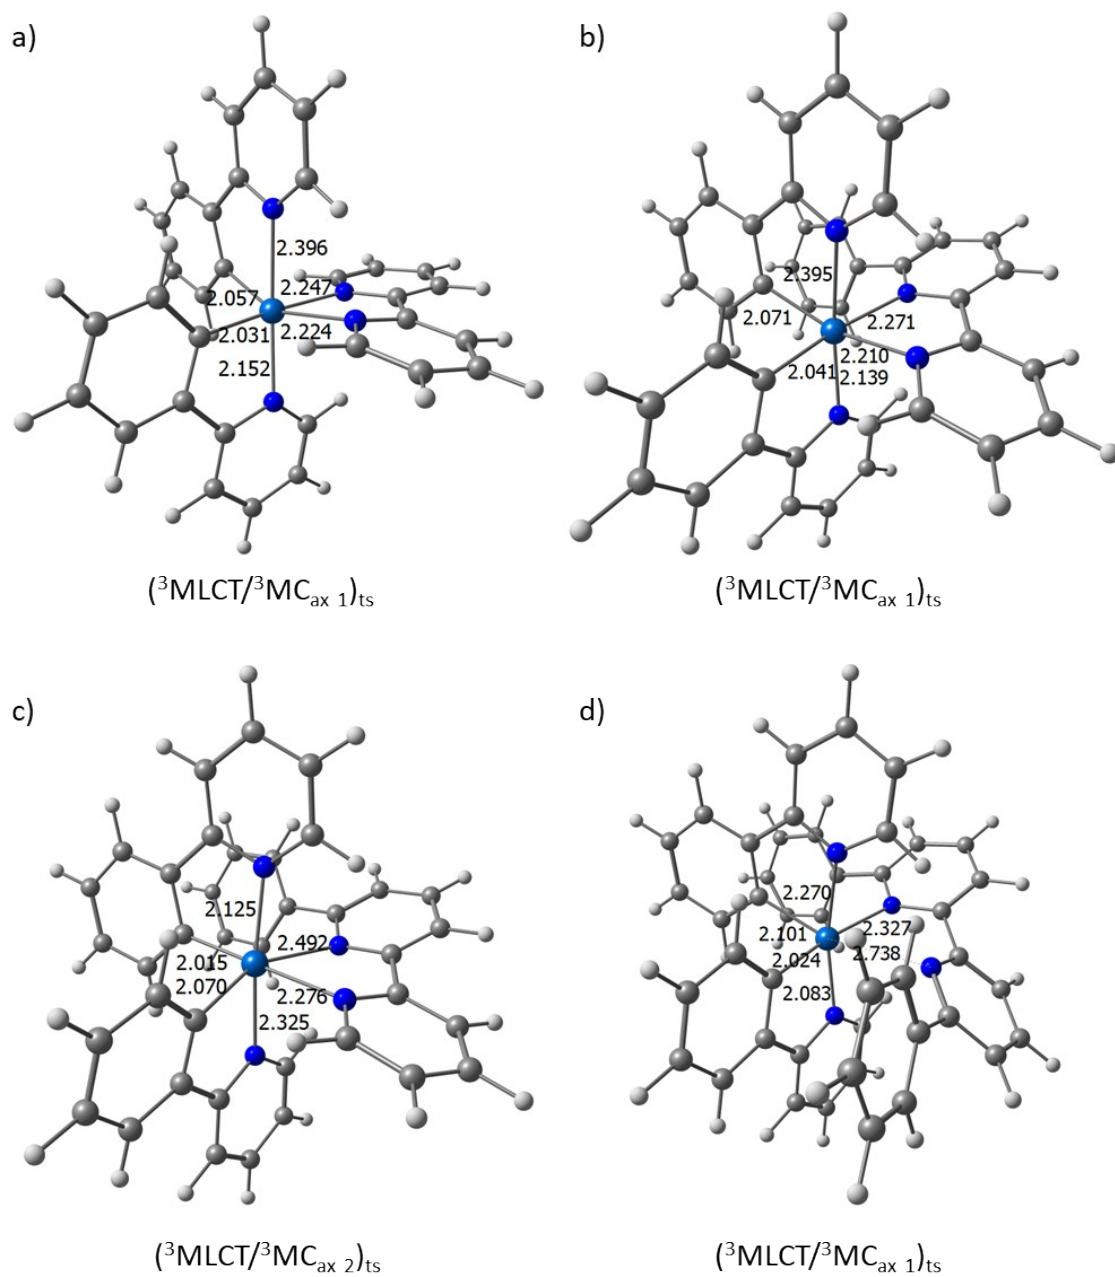

**Fig. S12** B3LYP/DEF2-SVP-CPCM( $\text{CH}_2\text{Cl}_2$ ) transition state geometries connecting the  ${}^3\text{MLCT}$  and  ${}^3\text{MC}_{\text{ax}}$  minima for complexes **1** (a), **2** (b and c) and **3** (d).

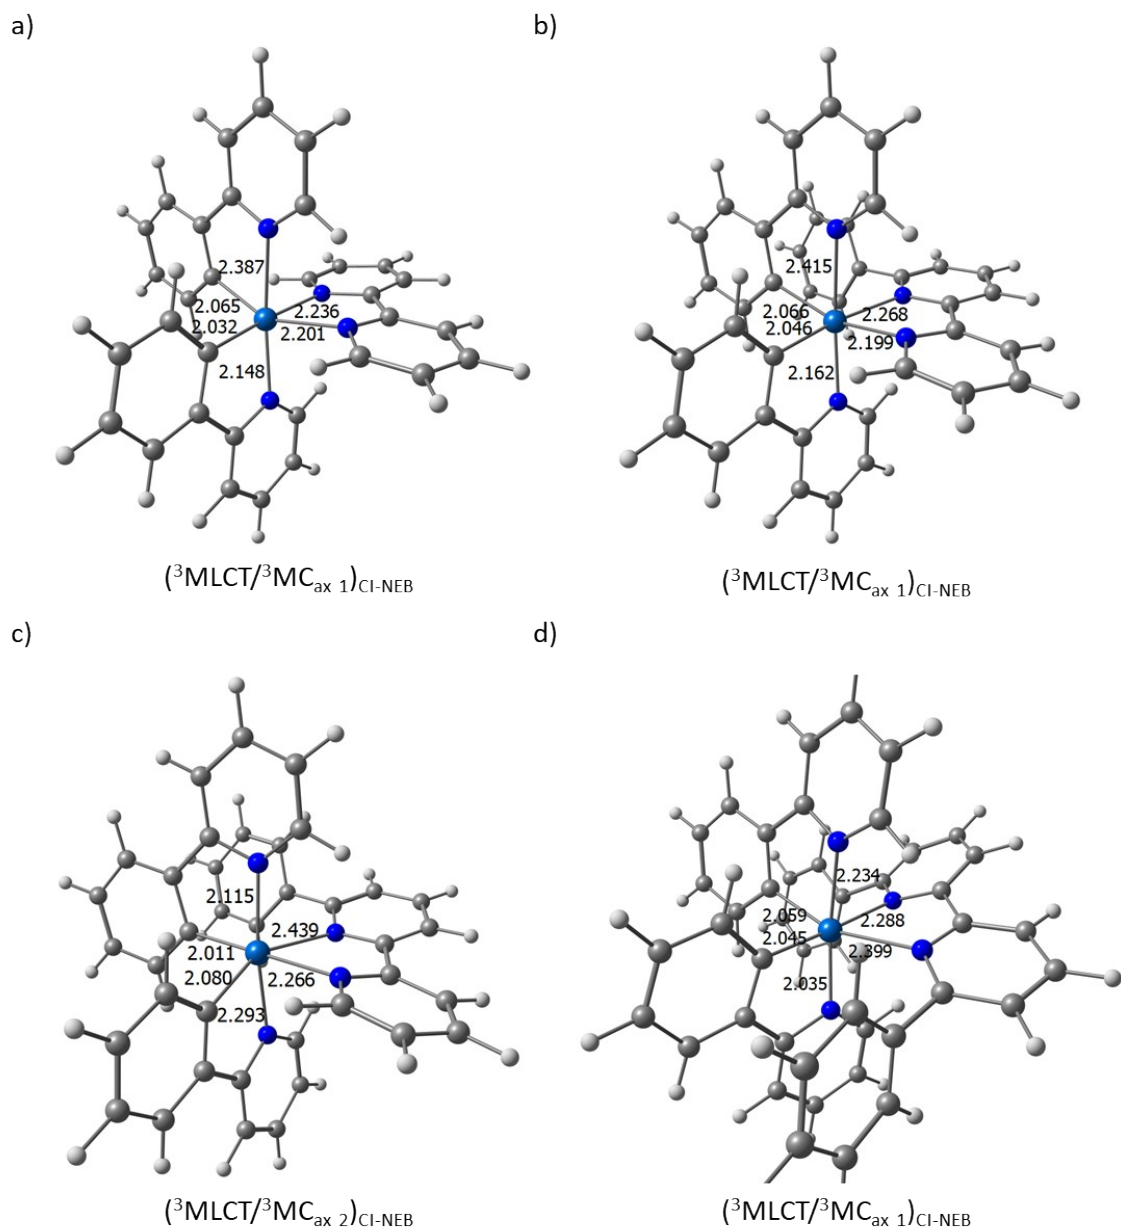

**Fig. S13** B3LYP/DEF2-SVP-CPCM( $\text{CH}_2\text{Cl}_2$ ) geometries of the climbing image along the MEP obtained with the CI-NEB method connecting the  ${}^3\text{MLCT}$  and  ${}^3\text{MC}_{\text{ax}}$  minima for complexes **1** (a), **2** (b and c) and **3** (d).

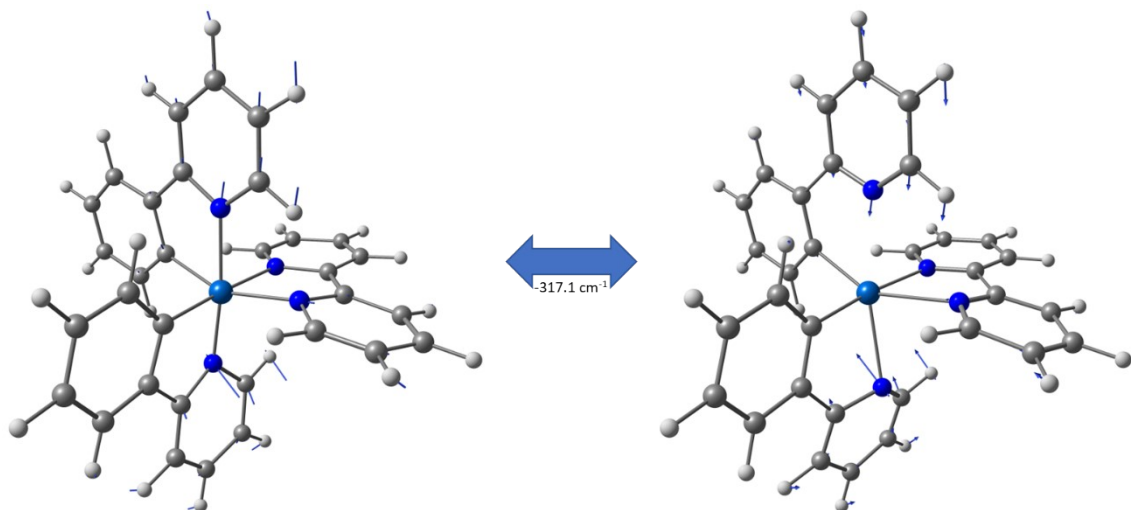

**Fig. S14** Imaginary frequency characterizing the  $({}^3\text{MLCT}/{}^3\text{MC}_{\text{ax}} 1)_{\text{ts}}$  transition state in complex **1**.

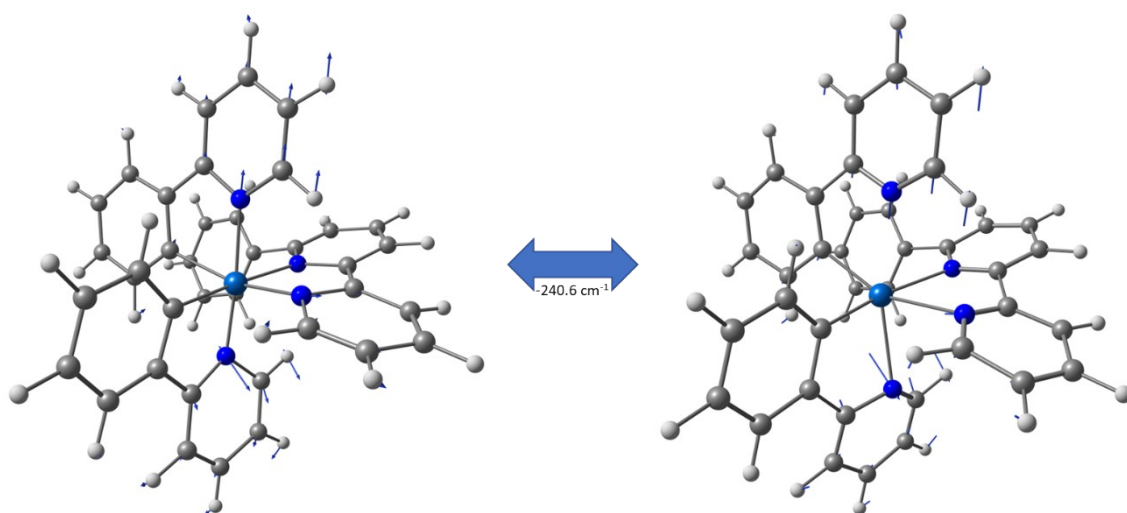

**Fig. S15** Imaginary frequency characterizing the ( ${}^3\text{MLCT}/{}^3\text{MC}_{\text{ax}1}$ )<sub>ts</sub> transition state in complex 2.

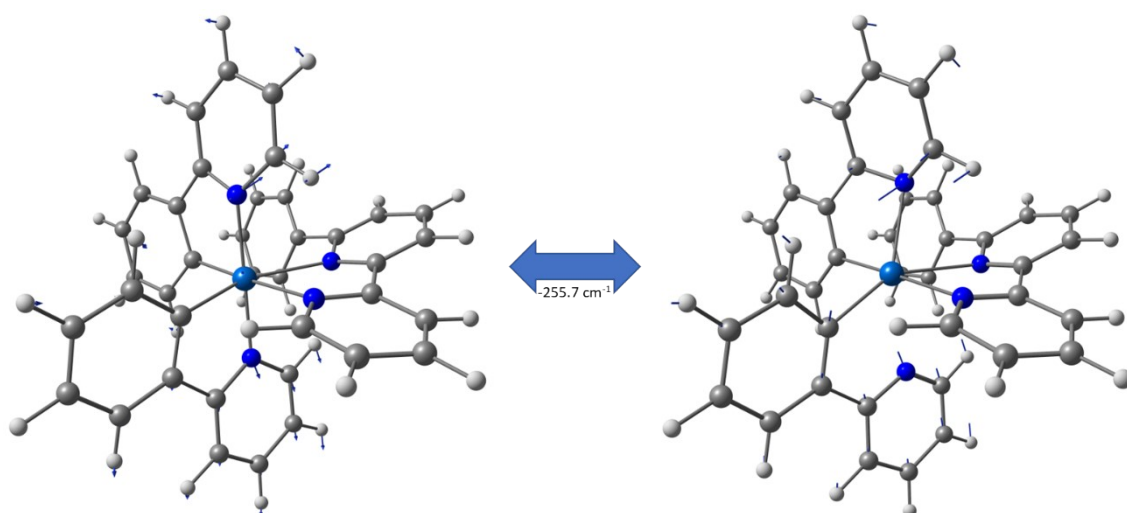

**Fig. S16** Imaginary frequency characterizing the ( ${}^3\text{MLCT}/{}^3\text{MC}_{\text{ax}2}$ )<sub>ts</sub> transition state in complex 2.

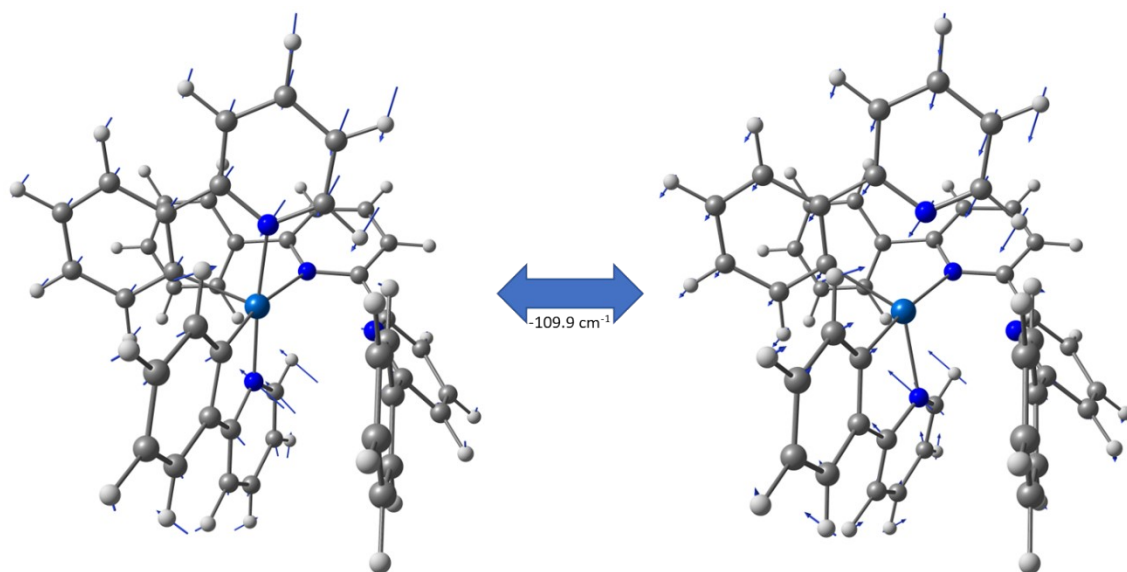

**Fig. S17** Imaginary frequency characterizing the ( ${}^3\text{MLCT}/{}^3\text{MC}_{\text{ax}1}$ )<sub>ts</sub> transition state in complex 3.

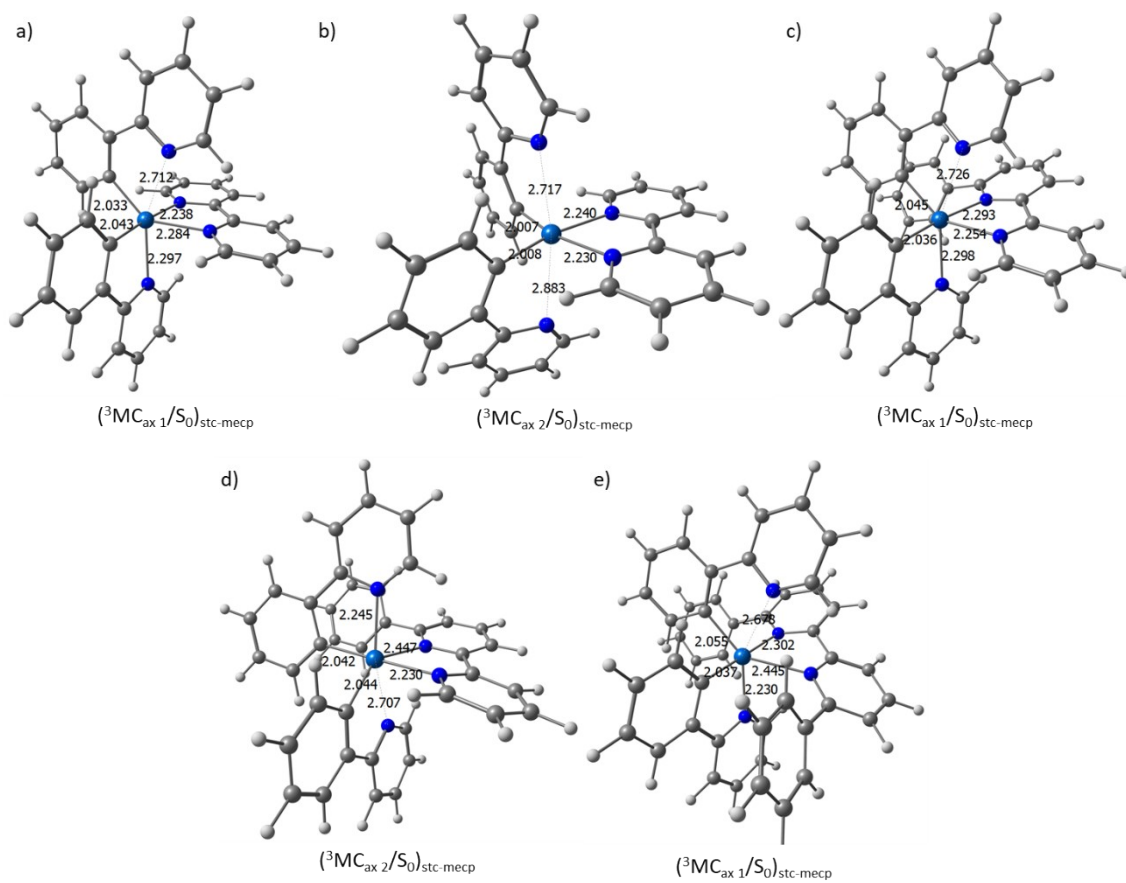

**Fig. S18** B3LYP/DEF2-SVP-CPCM( $\text{CH}_2\text{Cl}_2$ ) minimum energy crossing point geometries between the  ${}^3\text{MC}_{\text{ax}}$  and  $S_0$  states ( $({}^3\text{MC}_{\text{ax}}/S_0)_{\text{stc-mecp}}$ ) for complexes **1** (a and b), **2** (c and d) and **3** (e).

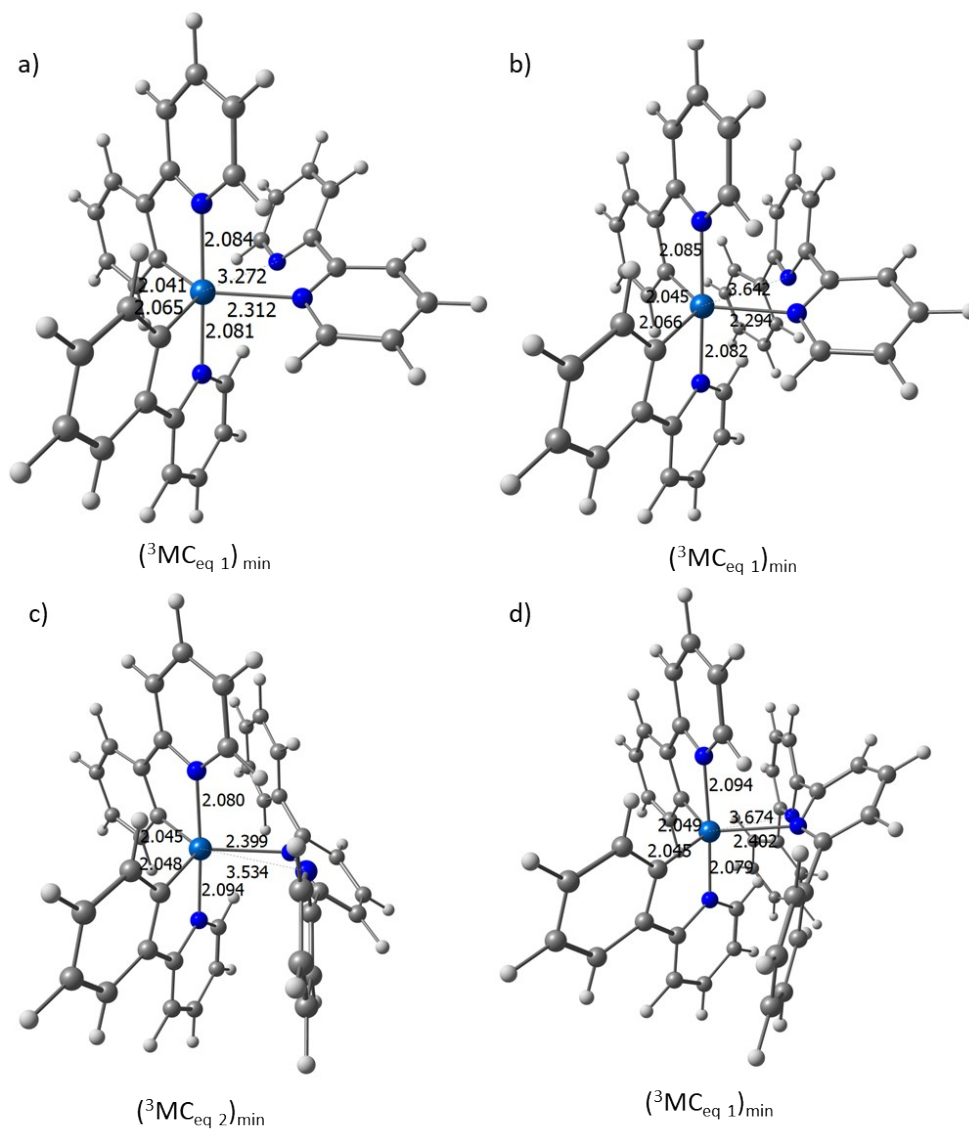

**Fig. S19.** B3LYP/DEF2-SVP-CPCM( $CH_2Cl_2$ ) optimized  $^3MC_{eq}$  minima calculated for complexes **1** (a), **2** (b and c) and **3** (d).

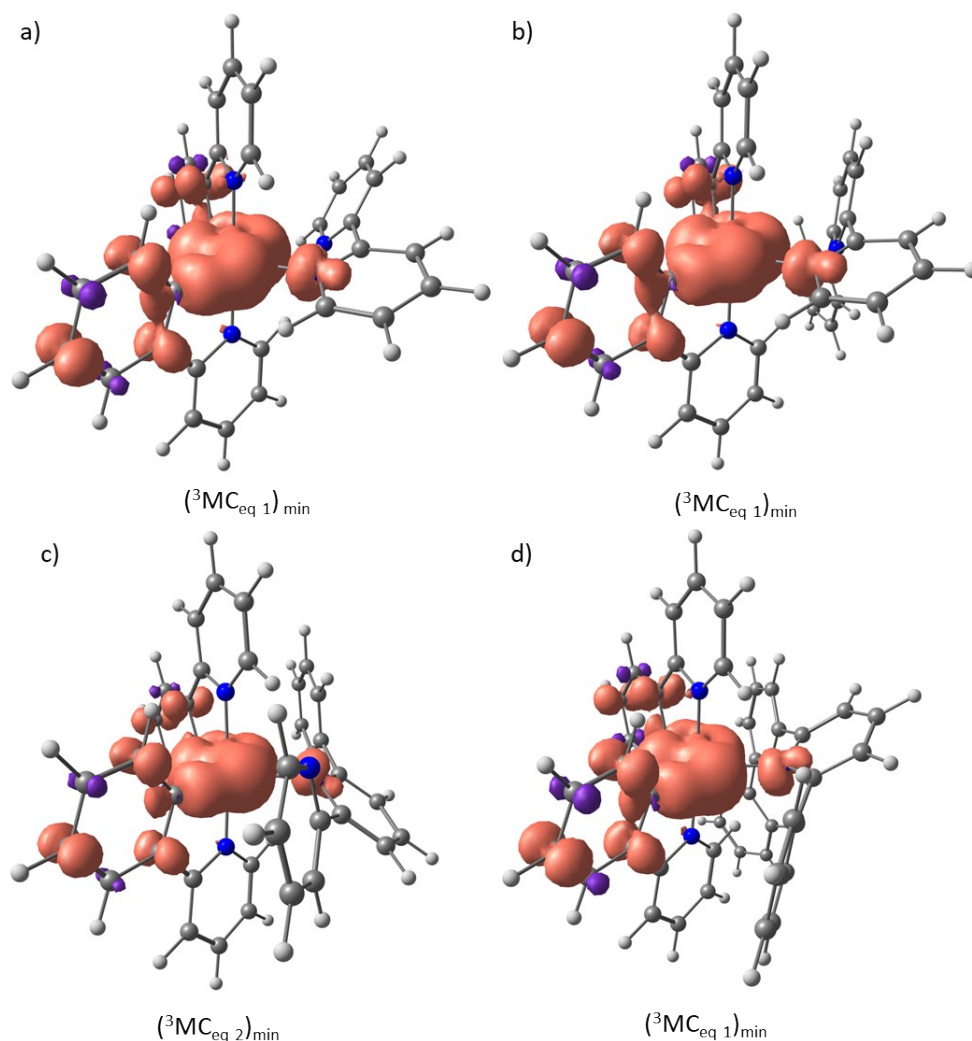

**Fig. S20** B3LYP/DEF2-SVP-PCPM( $\text{CH}_2\text{Cl}_2$ ) isosurface contour plots ( $\pm 0.004$  a.u.) of the unpaired-electron spin density computed at the optimized  $^3\text{MC}_{\text{eq}}$  minima for complex **1** (a), **2** (b and c) and **3** (d).

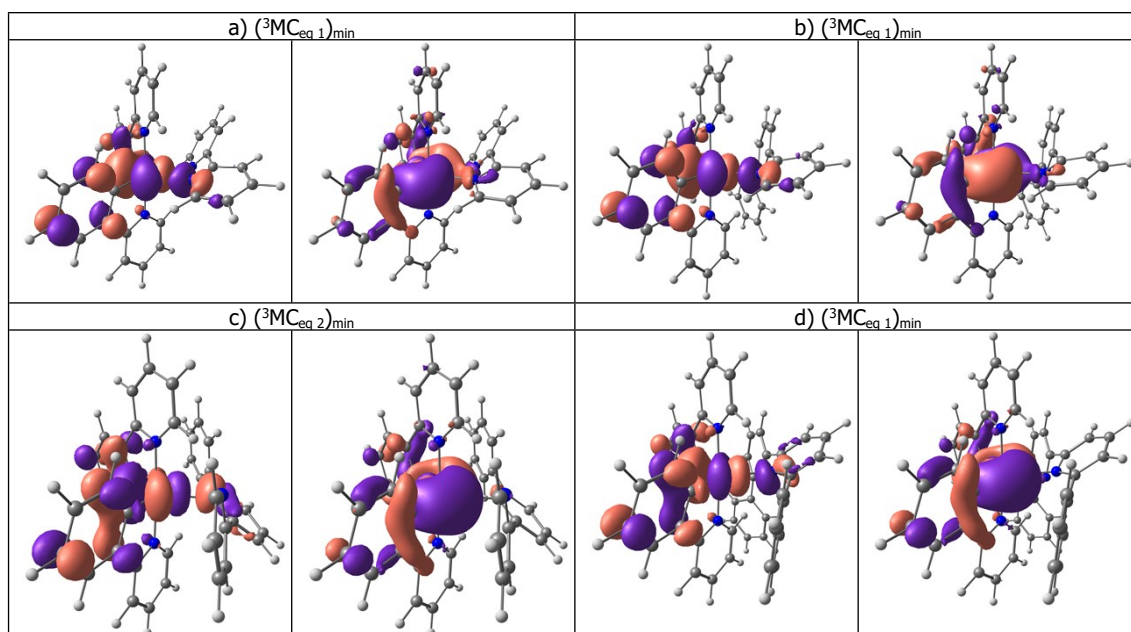

**Fig. S21** B3LYP/DEF2-SVP-PCPM( $\text{CH}_2\text{Cl}_2$ ) isosurface contour plots ( $\pm 0.03$  a.u.) of the NTO pairs computed at the optimized  $^3\text{MC}_{\text{eq}}$  minima of complexes **1** (a), **2** (b and c) and **3** (d).

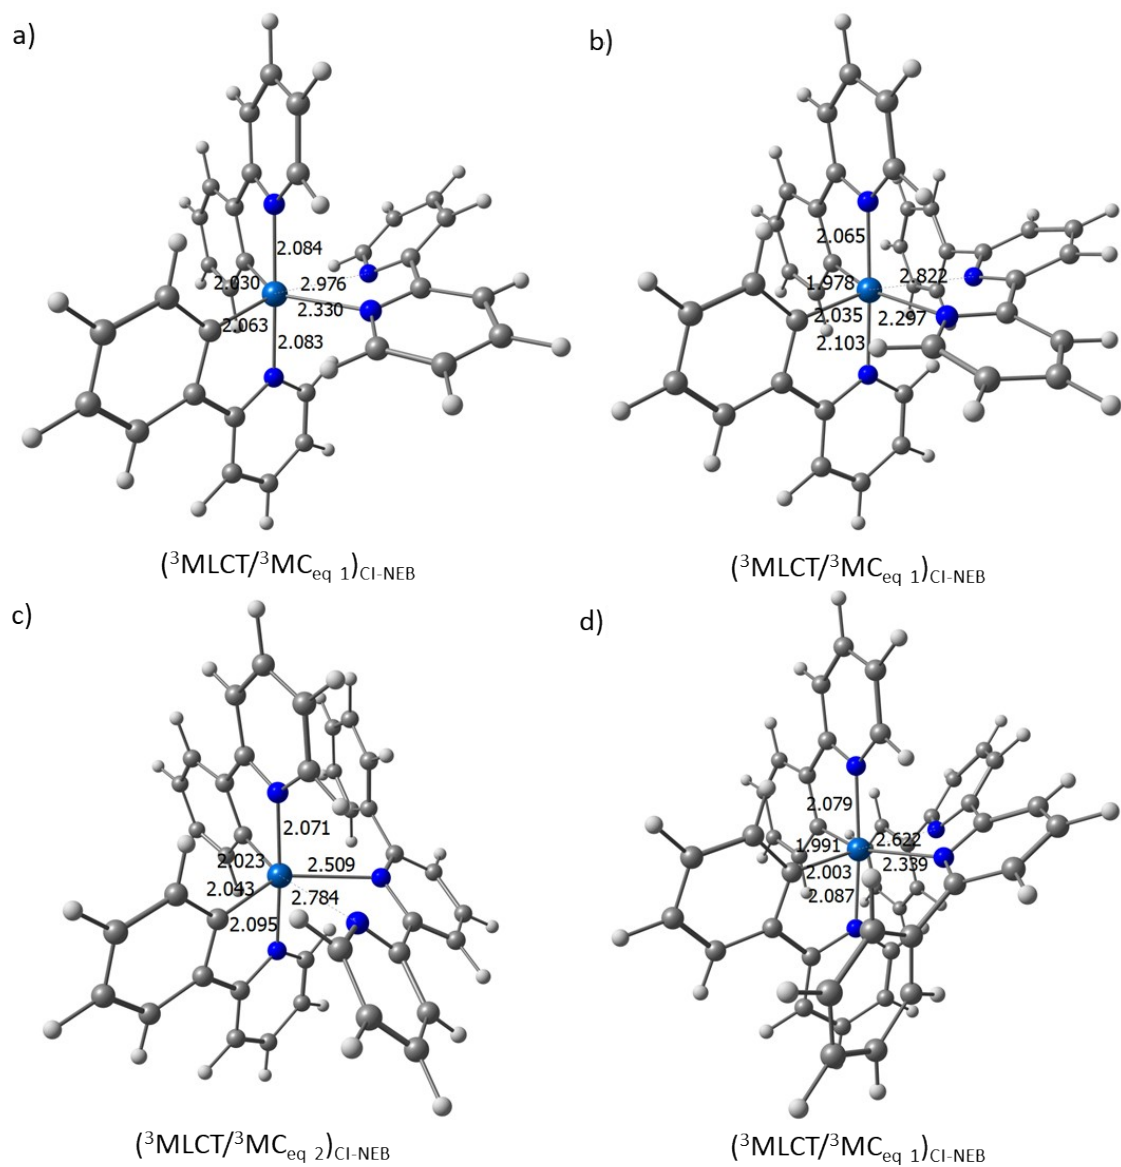

**Fig. S22** B3LYP/DEF2-SVP-CPCM( $\text{CH}_2\text{Cl}_2$ ) geometries of the climbing image along the MEP obtained with the CI-NEB method connecting the  ${}^3\text{MLCT}$  and  ${}^3\text{MC}_{\text{eq}}$  minima for complexes **1** (a), **2** (b and c) and **3** (d).

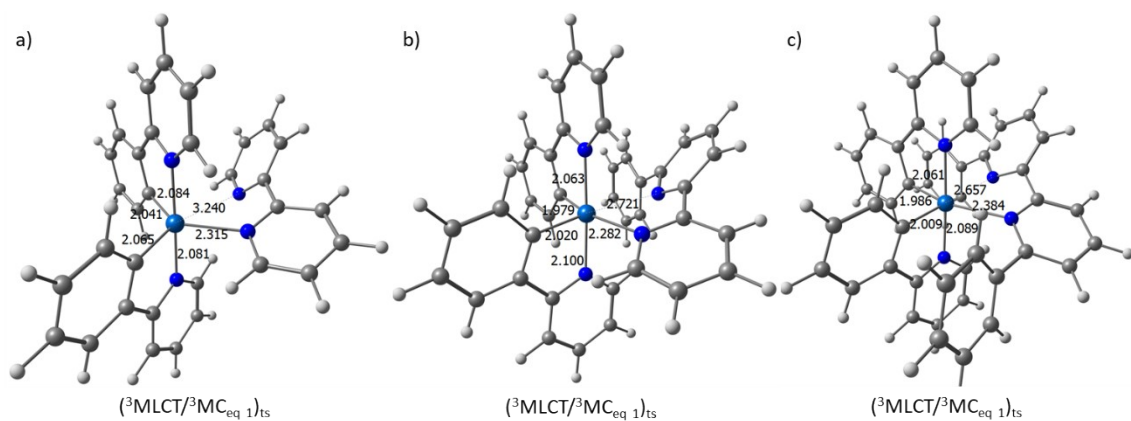

**Fig. S23** B3LYP/DEF2-SVP-CPCM( $\text{CH}_2\text{Cl}_2$ ) transition state geometries connecting the  ${}^3\text{MLCT}$  and  ${}^3\text{MC}_{\text{eq}}$  minima for complexes **1** (a), **2** (b) and **3** (c).



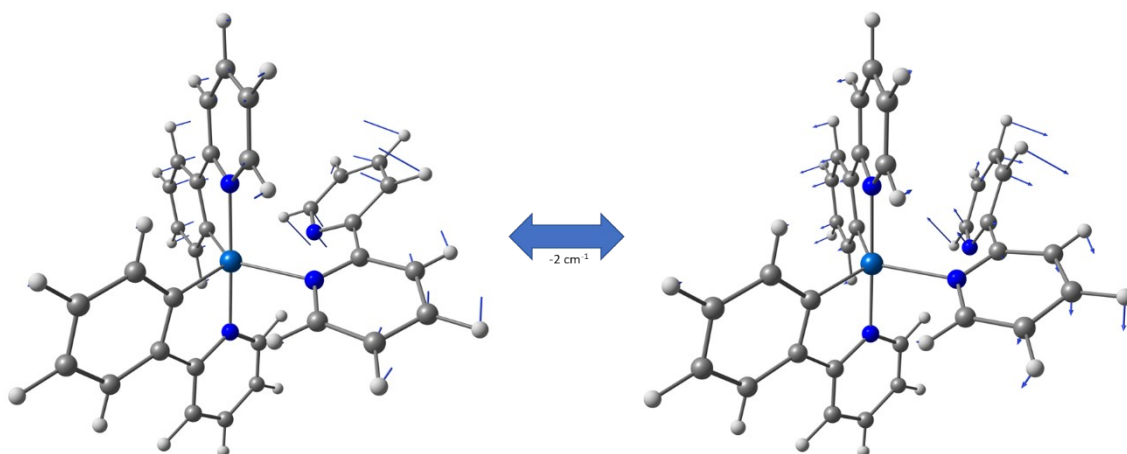

**Fig. S24** Imaginary frequency characterizing the ( ${}^3\text{MLCT}/{}^3\text{MC}_{\text{eq}1}$ )<sub>ts</sub> transition state in complex **1**.

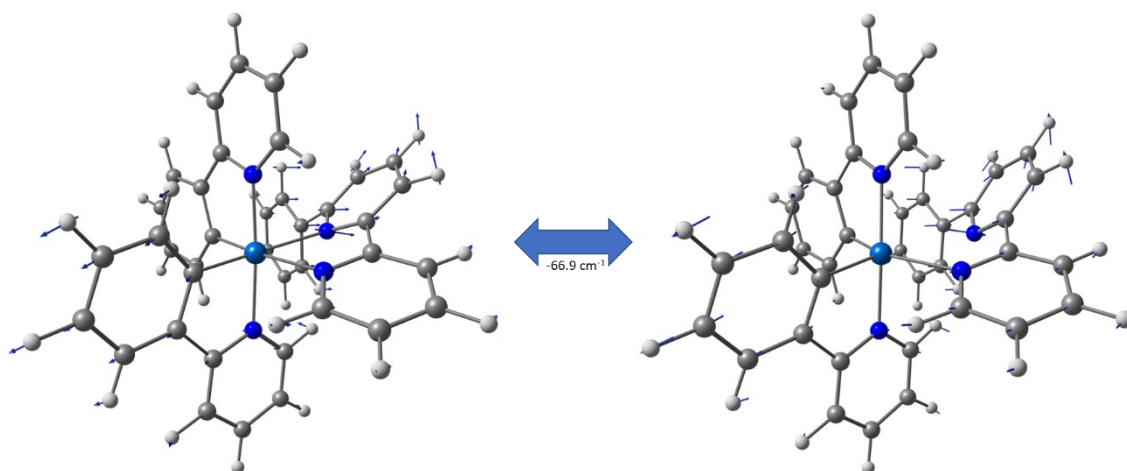

**Fig. S25** Imaginary frequency characterizing the ( ${}^3\text{MLCT}/{}^3\text{MC}_{\text{eq}1}$ )<sub>ts</sub> transition state in complex **2**.

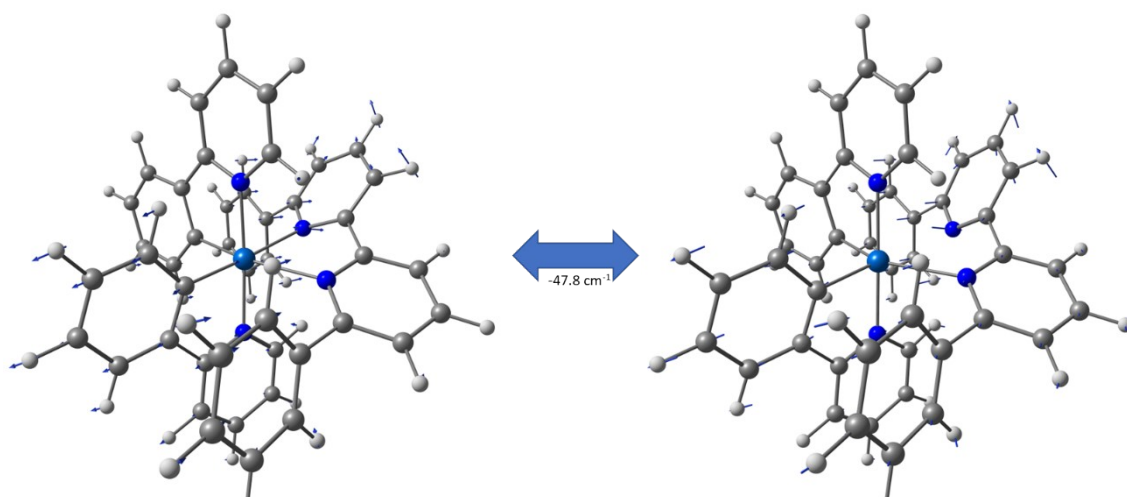

**Fig. S26** Imaginary frequency characterizing the ( ${}^3\text{MLCT}/{}^3\text{MC}_{\text{eq}1}$ )<sub>ts</sub> transition state in complex **3**.

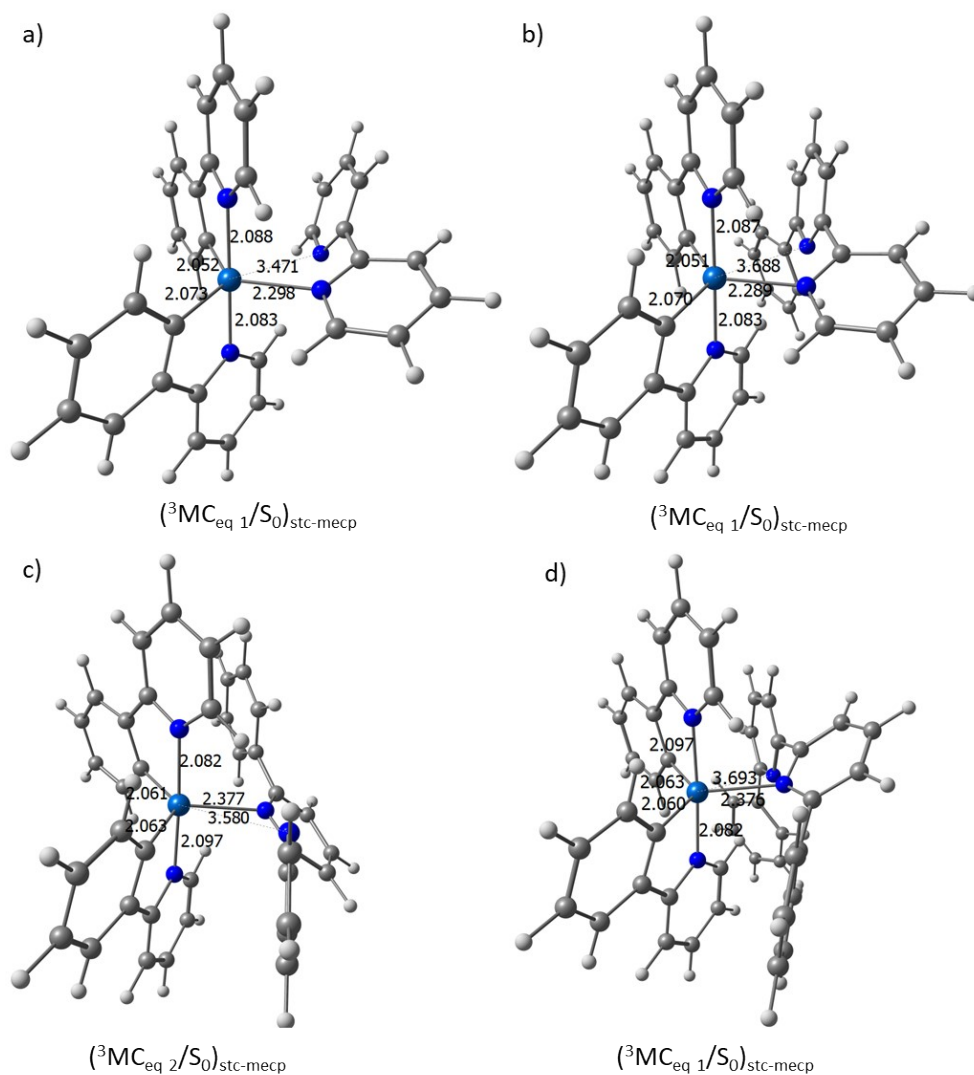

**Fig. S27** B3LYP/DEF2-SVP-CPCM(CH<sub>2</sub>Cl<sub>2</sub>) minimum energy crossing point geometries between the <sup>3</sup>MC<sub>eq</sub> and S<sub>0</sub> states for complexes **1** (a), **2** (b and c) and **3** (d).

**Table S2:** DFT B3LYP/DEF2-SVP-CPCM(CH<sub>2</sub>Cl<sub>2</sub>) energy differences (eV) for evolving from the (MLCT)<sub>min</sub> minimum to the (<sup>3</sup>MC<sub>ax</sub>)<sub>min</sub> and the (<sup>3</sup>MC<sub>eq</sub>)<sub>min</sub> minima for complexes **1**, **2** and **3**.

|                                                    | Complex  | $\Delta E^a$ | TS <sup>b</sup> | CI-NEB <sup>c</sup> |
|----------------------------------------------------|----------|--------------|-----------------|---------------------|
| ( <sup>3</sup> MC <sub>ax 1</sub> ) <sub>min</sub> | <b>1</b> | 0.61         | 0.76            | 0.78                |
| ( <sup>3</sup> MC <sub>ax 1</sub> ) <sub>min</sub> | <b>2</b> | 0.48         | 0.67            | 0.76                |
| ( <sup>3</sup> MC <sub>ax 2</sub> ) <sub>min</sub> | <b>2</b> | 0.55         | 0.70            | 0.74                |
| ( <sup>3</sup> MC <sub>ax 1</sub> ) <sub>min</sub> | <b>3</b> | 0.28         | 0.46            | 0.62                |
| ( <sup>3</sup> MC <sub>eq 1</sub> ) <sub>min</sub> | <b>1</b> | 0.61         | 0.61            | 0.63                |
| ( <sup>3</sup> MC <sub>eq 1</sub> ) <sub>min</sub> | <b>2</b> | 0.13         | 0.30            | 0.45                |
| ( <sup>3</sup> MC <sub>eq 2</sub> ) <sub>min</sub> | <b>2</b> | 0.46         | -               | 0.58                |
| ( <sup>3</sup> MC <sub>eq 1</sub> ) <sub>min</sub> | <b>3</b> | -0.18        | 0.16            | 0.31                |

<sup>a</sup> Energy difference between the (MLCT)<sub>min</sub> and the MC minimum.

<sup>b</sup> Energy difference between the (MLCT)<sub>min</sub> and the TS connecting the two minima.

<sup>c</sup> Energy difference between the (MLCT)<sub>min</sub> and the climbing image between the two minima.

```

!ZOOM-NEB-CI B3LYP DEF2-SVP SARC/J RIJCOSX RI-SOMF(1X) CPCM(CH2Cl2) UHF
%NEB
  PREOPT_ENDS FALSE
  NEB_END_XYZFILE "product.xyz"
  Restart_ALLXYZFile "orca_MEP.allxyz"
END
%SCF
  MAXITER 7500
END
%PAL
  NPROCS 64
END
%geom
  maxIter 950
end
* xyz 1 3

```

**Fig. S28** Orca input file used in order to perform a CI-NEB calculation between two given minima belonging to the same spin multiplicity, so to obtain the corresponding climbing-image geometry.

```

!OPTTS slowConv tightscf B3LYP DEF2-SVP SARC/J RIJCOSX RI-SOMF(1X) CPCM(CH2Cl2) UHF FREQ
%SCF
  MAXITER 7500
END
%PAL
  NPROCS 12
END
%geom
  maxIter 950
  Calc_hess TRUE
end
%MAXCORE 4000
* xyz 1 3

```

**Fig. S29** Orca input file used to localize the TS starting from the climbing image structure.

**Table S3:** Cartesian coordinates (*x*, *y*, *z*, in Å) of the optimized structures for the studied complexes. The level of theory employed in each optimization is specified.

### Complex 1 in CH<sub>2</sub>Cl<sub>2</sub>.

(S<sub>0</sub>)<sub>min</sub> DFT B3LYP/DEF2-SVP CPCM

|    |              |              |              |
|----|--------------|--------------|--------------|
| C  | 1.206330000  | 3.918871000  | -1.328508000 |
| C  | 1.067160000  | 2.692331000  | -0.657390000 |
| N  | 0.171109000  | 1.765914000  | -1.113317000 |
| C  | -0.569112000 | 2.027845000  | -2.208211000 |
| C  | 1.820767000  | 2.280126000  | 0.532571000  |
| C  | 1.518603000  | 0.979600000  | 1.028377000  |
| C  | 2.223187000  | 0.541256000  | 2.165545000  |
| C  | 3.178386000  | 1.353734000  | 2.788071000  |
| C  | 3.461323000  | 2.633158000  | 2.288431000  |
| C  | 2.782543000  | 3.094404000  | 1.161237000  |
| Ir | 0.068723000  | 0.000160000  | 0.000104000  |
| N  | 0.177063000  | -1.765190000 | 1.113539000  |
| C  | 1.075834000  | -2.688852000 | 0.657358000  |
| C  | 1.219106000  | -3.914873000 | 1.328566000  |
| C  | -0.456456000 | -3.224330000 | 2.911053000  |
| C  | -0.561908000 | -2.029301000 | 2.208751000  |
| C  | 1.827771000  | -2.274322000 | -0.532858000 |
| C  | 1.521569000  | -0.974650000 | -1.028405000 |
| C  | 2.224575000  | -0.533978000 | -2.165640000 |
| C  | 3.182087000  | -1.343449000 | -2.788527000 |
| C  | 3.468930000  | -2.622128000 | -2.289212000 |
| C  | 2.791788000  | -3.085617000 | -1.161949000 |
| H  | 4.208447000  | 3.265103000  | 2.775372000  |
| H  | 3.006396000  | 4.091363000  | 0.773487000  |

|   |              |              |              |
|---|--------------|--------------|--------------|
| H | 2.031644000  | -0.452251000 | 2.579195000  |
| H | 3.710245000  | 0.984894000  | 3.670516000  |
| H | 2.029913000  | 0.459018000  | -2.579055000 |
| H | 3.018623000  | -4.082004000 | -0.774473000 |
| H | 3.712660000  | -0.972840000 | -3.671005000 |
| H | 4.217794000  | -3.251766000 | -2.776470000 |
| H | -1.259856000 | 1.246286000  | -2.526266000 |
| C | 0.438726000  | 4.188394000  | -2.457220000 |
| H | 1.920556000  | 4.656447000  | -0.961844000 |
| H | 0.546082000  | 5.141206000  | -2.981484000 |
| C | -0.467667000 | 3.223277000  | -2.910429000 |
| H | -1.088753000 | 3.386429000  | -3.792779000 |
| C | 0.452750000  | -4.186673000 | 2.457585000  |
| H | -1.254974000 | -1.249869000 | 2.526979000  |
| H | -1.076703000 | -3.389318000 | 3.793651000  |
| H | 0.563267000  | -5.139089000 | 2.981913000  |
| H | 1.935542000  | -4.650243000 | 0.961762000  |
| C | -2.746451000 | -2.270055000 | -2.671140000 |
| C | -2.909651000 | 0.474851000  | 0.567441000  |
| C | -4.088494000 | 0.974778000  | 1.139488000  |
| C | -4.010634000 | 1.875803000  | 2.200801000  |
| C | -2.754131000 | 2.261331000  | 2.670910000  |
| C | -1.622196000 | 1.724014000  | 2.060035000  |
| N | -1.695268000 | 0.853055000  | 1.040555000  |
| H | -5.063301000 | 0.667380000  | 0.762434000  |
| H | -4.923525000 | 2.271007000  | 2.652378000  |
| H | -2.642099000 | 2.965296000  | 3.497610000  |
| H | -0.618038000 | 1.993063000  | 2.394584000  |
| C | -2.908020000 | -0.484696000 | -0.567160000 |
| C | -4.085145000 | -0.988591000 | -1.139239000 |
| C | -4.004248000 | -1.889040000 | -2.200815000 |
| C | -1.616352000 | -1.729007000 | -2.060161000 |
| N | -1.692368000 | -0.858610000 | -1.040413000 |
| H | -5.060971000 | -0.684637000 | -0.762054000 |
| H | -4.915796000 | -2.287272000 | -2.652441000 |
| H | -2.632030000 | -2.973366000 | -3.498067000 |
| H | -0.611287000 | -1.994495000 | -2.394834000 |

**(<sup>3</sup>MLCT)<sub>min</sub>** DFT B3LYP/DEF2-SVP CPCM

|    |              |              |              |
|----|--------------|--------------|--------------|
| C  | -3.889732000 | 1.167016000  | -1.477813000 |
| C  | -2.685158000 | 1.064891000  | -0.768272000 |
| N  | -1.706642000 | 0.219188000  | -1.204053000 |
| C  | -1.891717000 | -0.523546000 | -2.309070000 |
| C  | -2.349911000 | 1.800233000  | 0.458557000  |
| C  | -1.070547000 | 1.505908000  | 1.031979000  |
| C  | -0.705205000 | 2.167283000  | 2.225832000  |
| C  | -1.556133000 | 3.103224000  | 2.813270000  |
| C  | -2.799903000 | 3.393832000  | 2.227791000  |
| C  | -3.196259000 | 2.745628000  | 1.054095000  |
| Ir | 0.000019000  | 0.158314000  | -0.000034000 |
| N  | 1.706703000  | 0.218117000  | 1.204008000  |
| C  | 2.685710000  | 1.063285000  | 0.768295000  |
| C  | 3.890330000  | 1.164688000  | 1.477864000  |
| C  | 3.067957000  | -0.461798000 | 3.051006000  |
| C  | 1.891335000  | -0.524785000 | 2.308987000  |
| C  | 2.350915000  | 1.798876000  | -0.458507000 |
| C  | 1.071400000  | 1.505307000  | -1.031982000 |
| C  | 0.706497000  | 2.166918000  | -2.225840000 |

|   |              |              |              |
|---|--------------|--------------|--------------|
| C | 1.557999000  | 3.102369000  | -2.813226000 |
| C | 2.801906000  | 3.392253000  | -2.227683000 |
| C | 3.197833000  | 2.743801000  | -1.053980000 |
| H | -3.464202000 | 4.127594000  | 2.691137000  |
| H | -4.165764000 | 2.987209000  | 0.613143000  |
| H | 0.257265000  | 1.955592000  | 2.696641000  |
| H | -1.254906000 | 3.614920000  | 3.731339000  |
| H | -0.256077000 | 1.955805000  | -2.696701000 |
| H | 4.167456000  | 2.984818000  | -0.612979000 |
| H | 1.257113000  | 3.614249000  | -3.731304000 |
| H | 3.466651000  | 4.125640000  | -2.690985000 |
| H | -1.069001000 | -1.178993000 | -2.596992000 |
| C | -4.083315000 | 0.401817000  | -2.626236000 |
| H | -4.671312000 | 1.841293000  | -1.127543000 |
| H | -5.019802000 | 0.476102000  | -3.184123000 |
| C | -3.068320000 | -0.459858000 | -3.051058000 |
| H | -3.176727000 | -1.078701000 | -3.943296000 |
| C | 4.083450000  | 0.399325000  | 2.626256000  |
| H | 1.068241000  | -1.179782000 | 2.596851000  |
| H | 3.175993000  | -1.080746000 | 3.943217000  |
| H | 5.019965000  | 0.473056000  | 3.184169000  |
| H | 4.672300000  | 1.838533000  | 1.127636000  |
| C | 2.393315000  | -2.645714000 | -2.568201000 |
| C | -0.483597000 | -2.825895000 | 0.525755000  |
| C | -1.033330000 | -4.007595000 | 1.111214000  |
| C | -1.972033000 | -3.924923000 | 2.113783000  |
| C | -2.394811000 | -2.644419000 | 2.568149000  |
| C | -1.832708000 | -1.526791000 | 1.979792000  |
| N | -0.902948000 | -1.585143000 | 0.998371000  |
| H | -0.705316000 | -4.984596000 | 0.754824000  |
| H | -2.387306000 | -4.835054000 | 2.554022000  |
| H | -3.136703000 | -2.529254000 | 3.359795000  |
| H | -2.124523000 | -0.526170000 | 2.305501000  |
| C | 0.481995000  | -2.826159000 | -0.525816000 |
| C | 1.031171000  | -4.008158000 | -1.111198000 |
| C | 1.969927000  | -3.925989000 | -2.113760000 |
| C | 1.831744000  | -1.527782000 | -1.979913000 |
| N | 0.901949000  | -1.585635000 | -0.998495000 |
| H | 0.702695000  | -4.984983000 | -0.754751000 |
| H | 2.384776000  | -4.836345000 | -2.553934000 |
| H | 3.135265000  | -2.530950000 | -3.359852000 |
| H | 2.124034000  | -0.527319000 | -2.305678000 |

(<sup>3</sup>MC<sub>ax 1</sub>)<sub>min</sub> DFT B3LYP/DEF2-SVP CPCM

|    |              |              |              |
|----|--------------|--------------|--------------|
| Ir | -0.015920000 | 0.009100000  | -0.431145000 |
| N  | -1.124490000 | -0.925435000 | 1.739624000  |
| N  | 1.711666000  | 0.703485000  | -1.768586000 |
| C  | -3.119658000 | -2.044054000 | 2.433299000  |
| C  | -2.324320000 | -1.459774000 | 1.427251000  |
| C  | -0.681949000 | -0.952771000 | 2.999530000  |
| C  | -2.714846000 | -1.393571000 | 0.000638000  |
| C  | -1.828059000 | -0.786120000 | -0.924531000 |
| C  | -2.210525000 | -0.717120000 | -2.279035000 |
| C  | -3.426151000 | -1.252245000 | -2.720800000 |
| C  | -4.297074000 | -1.852637000 | -1.804392000 |
| C  | -3.942533000 | -1.915312000 | -0.457407000 |
| C  | 2.425806000  | -0.338750000 | -2.266843000 |
| C  | 3.410198000  | -0.100481000 | -3.242705000 |

|   |              |              |              |
|---|--------------|--------------|--------------|
| C | 2.888805000  | 2.254250000  | -3.162439000 |
| C | 1.928764000  | 1.955283000  | -2.199722000 |
| C | 2.077366000  | -1.666019000 | -1.720069000 |
| C | 0.957990000  | -1.741445000 | -0.838425000 |
| C | 0.635283000  | -3.008015000 | -0.313396000 |
| C | 1.375957000  | -4.150319000 | -0.635986000 |
| C | 2.471832000  | -4.059263000 | -1.503855000 |
| C | 2.818110000  | -2.820635000 | -2.042523000 |
| H | -5.251983000 | -2.267503000 | -2.137025000 |
| H | -4.637445000 | -2.380896000 | 0.244410000  |
| H | -1.548254000 | -0.245371000 | -3.013014000 |
| H | -3.691706000 | -1.195587000 | -3.780399000 |
| H | -0.216270000 | -3.110364000 | 0.362997000  |
| H | 3.679285000  | -2.757025000 | -2.711954000 |
| H | 1.095531000  | -5.118074000 | -0.209181000 |
| H | 3.054853000  | -4.948546000 | -1.757094000 |
| H | 0.300221000  | -0.510672000 | 3.188146000  |
| C | -2.659978000 | -2.070857000 | 3.747987000  |
| H | -4.090166000 | -2.477084000 | 2.191467000  |
| H | -3.271158000 | -2.523762000 | 4.533037000  |
| C | -1.411936000 | -1.516100000 | 4.046582000  |
| H | -1.008826000 | -1.517985000 | 5.061356000  |
| C | 3.641482000  | 1.198542000  | -3.690138000 |
| H | 1.313967000  | 2.740464000  | -1.751196000 |
| H | 3.040001000  | 3.285837000  | -3.485660000 |
| H | 4.403852000  | 1.386706000  | -4.450522000 |
| H | 3.985219000  | -0.929679000 | -3.655287000 |
| C | 3.166542000  | 0.966691000  | 2.636972000  |
| C | -0.329720000 | 2.737979000  | 0.994422000  |
| C | -0.845020000 | 3.990369000  | 1.357198000  |
| C | -1.971265000 | 4.487715000  | 0.702903000  |
| C | -2.557926000 | 3.721880000  | -0.305367000 |
| C | -1.999480000 | 2.481436000  | -0.610321000 |
| N | -0.918394000 | 1.996572000  | 0.021659000  |
| H | -0.371442000 | 4.578327000  | 2.142746000  |
| H | -2.380246000 | 5.462817000  | 0.977510000  |
| H | -3.437078000 | 4.068815000  | -0.851593000 |
| C | 0.886856000  | 2.161569000  | 1.619247000  |
| C | 1.633618000  | 2.824406000  | 2.604971000  |
| C | 2.781420000  | 2.220634000  | 3.117355000  |
| C | 2.376342000  | 0.360040000  | 1.662226000  |
| N | 1.271227000  | 0.943236000  | 1.174823000  |
| H | 1.328327000  | 3.804777000  | 2.969122000  |
| H | 3.370368000  | 2.728927000  | 3.884419000  |
| H | 4.059556000  | 0.460042000  | 3.007495000  |
| H | 2.626959000  | -0.622659000 | 1.256133000  |
| H | -2.433586000 | 1.846230000  | -1.384917000 |

(<sup>3</sup>MC<sub>eq 1</sub>)<sub>min</sub> DFT B3LYP/DEF2-SVP CPCM.

|    |              |              |              |
|----|--------------|--------------|--------------|
| Ir | -0.309345000 | 0.455344000  | 0.153507000  |
| N  | 0.684976000  | -1.996816000 | -1.770504000 |
| N  | -0.903296000 | -1.726529000 | 0.637282000  |
| N  | 1.444493000  | 0.304281000  | 1.269701000  |
| N  | -2.046210000 | 0.649088000  | -0.976230000 |
| C  | 1.636081000  | -1.934383000 | -2.706264000 |
| C  | 3.090496000  | -3.385941000 | -1.466347000 |
| C  | 2.098109000  | -3.461383000 | -0.486626000 |
| C  | 0.903469000  | -2.748791000 | -0.681380000 |

|   |              |              |              |
|---|--------------|--------------|--------------|
| C | -1.958648000 | -1.829691000 | 1.467479000  |
| C | -2.367008000 | -3.037717000 | 2.028036000  |
| C | -1.645010000 | -4.191373000 | 1.718997000  |
| C | -0.560711000 | -4.088960000 | 0.849042000  |
| C | -0.211717000 | -2.841790000 | 0.306937000  |
| C | 2.855626000  | -2.612227000 | -2.604812000 |
| C | 3.879810000  | 0.153076000  | 2.606464000  |
| C | -3.451005000 | 0.099447000  | -2.835281000 |
| C | -4.417464000 | 0.999966000  | -2.373813000 |
| C | 3.342389000  | 2.028489000  | -1.400285000 |
| C | 3.045050000  | 2.553587000  | -2.659047000 |
| C | 1.747786000  | 2.429736000  | -3.182159000 |
| C | 0.750261000  | 1.777793000  | -2.452262000 |
| C | 1.025911000  | 1.229784000  | -1.182478000 |
| C | 2.347528000  | 1.368196000  | -0.658181000 |
| C | 1.519201000  | -0.256802000 | 2.493332000  |
| C | 2.715240000  | -0.355150000 | 3.194612000  |
| C | 3.804317000  | 0.732146000  | 1.342749000  |
| C | 2.571760000  | 0.800275000  | 0.675012000  |
| C | -3.405482000 | 3.131923000  | 1.413558000  |
| C | -2.994163000 | 3.679455000  | 2.631260000  |
| C | -1.797093000 | 3.253145000  | 3.225408000  |
| C | -1.009586000 | 2.278779000  | 2.603176000  |
| C | -1.406871000 | 1.700798000  | 1.382118000  |
| C | -2.623900000 | 2.147784000  | 0.784859000  |
| C | -2.275470000 | -0.047694000 | -2.105819000 |
| C | -2.986835000 | 1.512627000  | -0.491300000 |
| C | -4.184398000 | 1.706030000  | -1.195419000 |
| H | 1.420193000  | -1.312235000 | -3.581790000 |
| H | 3.599428000  | -2.528863000 | -3.400443000 |
| H | 4.033898000  | -3.923026000 | -1.338864000 |
| H | 2.252786000  | -4.050146000 | 0.419684000  |
| H | -2.485769000 | -0.901920000 | 1.700427000  |
| H | -3.232035000 | -3.060000000 | 2.693542000  |
| H | -1.928873000 | -5.160305000 | 2.137083000  |
| H | 0.004136000  | -4.976343000 | 0.559316000  |
| H | 4.700654000  | 1.128601000  | 0.864953000  |
| H | 4.837742000  | 0.096364000  | 3.129042000  |
| H | 2.725625000  | -0.817766000 | 4.182990000  |
| H | 0.583349000  | -0.629294000 | 2.914304000  |
| H | -3.598078000 | -0.482500000 | -3.746760000 |
| H | -5.350110000 | 1.144646000  | -2.924684000 |
| H | -4.933674000 | 2.399758000  | -0.812801000 |
| H | -1.480967000 | -0.735729000 | -2.405588000 |
| H | 3.821985000  | 3.066106000  | -3.231987000 |
| H | 1.516211000  | 2.845103000  | -4.167417000 |
| H | 4.351881000  | 2.144241000  | -0.998096000 |
| H | -0.250911000 | 1.697543000  | -2.882984000 |
| H | -1.477861000 | 3.685243000  | 4.178401000  |
| H | -0.077532000 | 1.967388000  | 3.082428000  |
| H | -4.334910000 | 3.481771000  | 0.957672000  |
| H | -3.605458000 | 4.444861000  | 3.116249000  |

(<sup>3</sup>MC<sub>ax 2</sub>)<sub>min</sub> DFT B3LYP/DEF2-SVP CPCM.

|   |              |              |              |
|---|--------------|--------------|--------------|
| C | -4.126579000 | 1.412473000  | -1.472208000 |
| C | -2.900943000 | 1.120724000  | -0.839887000 |
| N | -2.074729000 | 0.196799000  | -1.373904000 |
| C | -2.407099000 | -0.454967000 | -2.491104000 |

|    |              |              |              |
|----|--------------|--------------|--------------|
| C  | -2.434503000 | 1.773075000  | 0.410703000  |
| C  | -1.130051000 | 1.464310000  | 0.915921000  |
| C  | -0.711828000 | 2.116822000  | 2.098236000  |
| C  | -1.536013000 | 3.017465000  | 2.776714000  |
| C  | -2.810378000 | 3.306693000  | 2.272573000  |
| C  | -3.249107000 | 2.692076000  | 1.097536000  |
| Ir | 0.000073000  | 0.051955000  | 0.000024000  |
| N  | 2.074936000  | 0.195433000  | 1.373897000  |
| C  | 2.901488000  | 1.119261000  | 0.840243000  |
| C  | 4.127016000  | 1.410667000  | 1.472923000  |
| C  | 3.604215000  | -0.223219000 | 3.168192000  |
| C  | 2.406854000  | -0.456528000 | 2.491116000  |
| C  | 2.435642000  | 1.771709000  | -0.410519000 |
| C  | 1.131135000  | 1.463557000  | -0.915938000 |
| C  | 0.713454000  | 2.116165000  | -2.098390000 |
| C  | 1.538217000  | 3.016311000  | -2.776821000 |
| C  | 2.812650000  | 3.304919000  | -2.272498000 |
| C  | 3.250856000  | 2.690193000  | -1.097327000 |
| H  | -3.463469000 | 4.013228000  | 2.791571000  |
| H  | -4.245044000 | 2.936488000  | 0.723286000  |
| H  | 0.284523000  | 1.908963000  | 2.495947000  |
| H  | -1.185087000 | 3.499792000  | 3.693620000  |
| H  | -0.282939000 | 1.908776000  | -2.496248000 |
| H  | 4.246876000  | 2.934079000  | -0.722949000 |
| H  | 1.187691000  | 3.498741000  | -3.693825000 |
| H  | 3.466201000  | 4.011048000  | -2.791470000 |
| H  | -1.685361000 | -1.191934000 | -2.860048000 |
| C  | -4.476400000 | 0.736938000  | -2.640004000 |
| H  | -4.802234000 | 2.162684000  | -1.061004000 |
| H  | -5.424831000 | 0.958635000  | -3.136291000 |
| C  | -3.604619000 | -0.221363000 | -3.167789000 |
| H  | -3.842359000 | -0.773484000 | -4.079493000 |
| C  | 4.476350000  | 0.734959000  | 2.640764000  |
| H  | 1.684859000  | -1.193374000 | 2.859796000  |
| H  | 3.841568000  | -0.775477000 | 4.079913000  |
| H  | 5.424669000  | 0.956424000  | 3.137368000  |
| H  | 4.802943000  | 2.160771000  | 1.061976000  |
| C  | 2.683937000  | -2.789532000 | -2.243796000 |
| C  | -0.570747000 | -2.947158000 | 0.473963000  |
| C  | -1.164821000 | -4.125063000 | 0.950044000  |
| C  | -2.231836000 | -4.046044000 | 1.843221000  |
| C  | -2.685737000 | -2.788001000 | 2.243227000  |
| C  | -2.055657000 | -1.657598000 | 1.727068000  |
| N  | -1.026899000 | -1.731110000 | 0.865421000  |
| H  | -0.801192000 | -5.099606000 | 0.626107000  |
| H  | -2.700834000 | -4.957837000 | 2.220228000  |
| H  | -3.515909000 | -2.673013000 | 2.942628000  |
| H  | -2.380845000 | -0.655042000 | 2.011141000  |
| C  | 0.569105000  | -2.947469000 | -0.474251000 |
| C  | 1.162396000  | -4.125712000 | -0.950450000 |
| C  | 2.229328000  | -4.047313000 | -1.843785000 |
| C  | 2.054648000  | -1.658767000 | -1.727461000 |
| N  | 1.025974000  | -1.731674000 | -0.865670000 |
| H  | 0.798222000  | -5.100047000 | -0.626510000 |
| H  | 2.697700000  | -4.959380000 | -2.220906000 |
| H  | 3.514075000  | -2.675021000 | -2.943316000 |
| H  | 2.380446000  | -0.656401000 | -2.011507000 |



(<sup>3</sup>MLCT/<sup>3</sup>MC<sub>ax 1</sub>)<sub>CI-NEB</sub> DFT B3LYP/DEF2-SVP CPCM.

|    |              |              |              |
|----|--------------|--------------|--------------|
| Ir | 0.043970656  | -0.049833869 | -0.269752400 |
| N  | -1.149984932 | -0.918437969 | 1.605485711  |
| N  | 1.519468188  | 0.615355430  | -1.681403247 |
| C  | -3.190253659 | -1.965888371 | 2.290653856  |
| C  | -2.363298292 | -1.427785502 | 1.287904511  |
| C  | -0.725646195 | -0.931897484 | 2.874393727  |
| C  | -2.703088345 | -1.363814159 | -0.144026255 |
| C  | -1.759902248 | -0.742878291 | -0.997503193 |
| C  | -2.053775584 | -0.628811672 | -2.367265535 |
| C  | -3.241970855 | -1.158127272 | -2.889346048 |
| C  | -4.168146372 | -1.778538718 | -2.041760797 |
| C  | -3.901856245 | -1.875443051 | -0.675059545 |
| C  | 2.285302384  | -0.390464722 | -2.206162488 |
| C  | 3.193317618  | -0.105119692 | -3.235502460 |
| C  | 2.504440605  | 2.206235718  | -3.180444103 |
| C  | 1.623920948  | 1.873282137  | -2.157608438 |
| C  | 2.054294805  | -1.715694189 | -1.607761793 |
| C  | 1.010228257  | -1.798218477 | -0.639972679 |
| C  | 0.760522331  | -3.051306744 | -0.050960738 |
| C  | 1.508597544  | -4.181157467 | -0.401134470 |
| C  | 2.533540537  | -4.084026729 | -1.351593879 |
| C  | 2.805096361  | -2.853836621 | -1.953166295 |
| H  | -5.100695007 | -2.181561329 | -2.445052277 |
| H  | -4.634425378 | -2.356426889 | -0.022493247 |
| H  | -1.350321673 | -0.135230593 | -3.044933537 |
| H  | -3.445849980 | -1.077106712 | -3.961041666 |
| H  | -0.035274118 | -3.155321068 | 0.689775296  |
| H  | 3.609361314  | -2.787146404 | -2.689601066 |
| H  | 1.287721456  | -5.144799357 | 0.066877922  |
| H  | 3.119859870  | -4.965481891 | -1.623617687 |
| H  | 0.260943060  | -0.509060165 | 3.065842388  |
| C  | -2.747941529 | -1.982740585 | 3.611791717  |
| H  | -4.172337469 | -2.366629636 | 2.037365687  |
| H  | -3.380622835 | -2.401800459 | 4.398607803  |
| C  | -1.488551940 | -1.458002258 | 3.915933285  |
| H  | -1.097502305 | -1.451084896 | 4.935403904  |
| C  | 3.306962017  | 1.196008385  | -3.724842366 |
| H  | 0.989090707  | 2.627479462  | -1.689109901 |
| H  | 2.564991488  | 3.238577987  | -3.530068633 |
| H  | 4.017477099  | 1.420712376  | -4.524121990 |
| H  | 3.810673926  | -0.902106420 | -3.651459708 |
| C  | 3.295027065  | 0.956771867  | 2.590954793  |
| C  | -0.269653748 | 2.699486947  | 1.101838529  |
| C  | -0.794428546 | 3.955717320  | 1.467637297  |
| C  | -1.931380520 | 4.439728224  | 0.833983167  |
| C  | -2.534454257 | 3.663114593  | -0.166746672 |
| C  | -1.979266614 | 2.424851413  | -0.470259836 |
| N  | -0.884082862 | 1.942107520  | 0.144980752  |
| H  | -0.310779536 | 4.543502232  | 2.247536851  |
| H  | -2.344904295 | 5.411761416  | 1.113048350  |
| H  | -3.422941723 | 4.005091200  | -0.700869883 |
| C  | 0.960872329  | 2.148168134  | 1.669381853  |
| C  | 1.833141899  | 2.872234870  | 2.508161961  |
| C  | 2.994236455  | 2.277563080  | 2.981033169  |
| C  | 2.407086099  | 0.291491186  | 1.762663982  |
| N  | 1.258297685  | 0.858319212  | 1.324932519  |

|   |              |              |              |
|---|--------------|--------------|--------------|
| H | 1.597572825  | 3.900929287  | 2.781650956  |
| H | 3.667158677  | 2.830278654  | 3.640512424  |
| H | 4.196242570  | 0.448665775  | 2.938842628  |
| H | 2.588590534  | -0.736384931 | 1.441165338  |
| H | -2.424670245 | 1.784730169  | -1.233717541 |

**(<sup>3</sup>MLCT/<sup>3</sup>MC<sub>eq 1</sub>)<sub>CI-NEB</sub> DFT B3LYP/DEF2-SVP CPCM.**

|    |              |              |              |
|----|--------------|--------------|--------------|
| Ir | -0.228945660 | 0.419112913  | 0.113849727  |
| N  | 0.756240766  | -1.849660969 | -1.541606288 |
| N  | -0.875008183 | -1.729348360 | 0.743942502  |
| N  | 1.518636095  | 0.313116806  | 1.244064106  |
| N  | -1.962476734 | 0.561138914  | -1.032830756 |
| C  | 1.686034604  | -1.787708813 | -2.499140827 |
| C  | 2.820010364  | -3.722148245 | -1.646609484 |
| C  | 1.849406360  | -3.791619381 | -0.645517587 |
| C  | 0.818097377  | -2.836943970 | -0.635820193 |
| C  | -1.892916385 | -1.766581749 | 1.622876161  |
| C  | -2.361356373 | -2.948809435 | 2.191862725  |
| C  | -1.753499588 | -4.149109027 | 1.821576719  |
| C  | -0.710156412 | -4.114642072 | 0.898468664  |
| C  | -0.280183881 | -2.886239632 | 0.370685360  |
| C  | 2.733164070  | -2.708004537 | -2.603456803 |
| C  | 3.955999788  | 0.238992115  | 2.590180614  |
| C  | -3.357293193 | -0.039964805 | -2.884907662 |
| C  | -4.347103835 | 0.837801341  | -2.428497998 |
| C  | 3.315296261  | 2.303760982  | -1.305102535 |
| C  | 2.996211388  | 2.863059230  | -2.542756449 |
| C  | 1.719252476  | 2.663522142  | -3.096195660 |
| C  | 0.765422832  | 1.903904595  | -2.416519552 |
| C  | 1.064397555  | 1.316464698  | -1.167225256 |
| C  | 2.367635651  | 1.527169064  | -0.615445899 |
| C  | 1.622151380  | -0.300875690 | 2.441195774  |
| C  | 2.819058131  | -0.364455087 | 3.144034675  |
| C  | 3.850125277  | 0.878957988  | 1.359365560  |
| C  | 2.618291395  | 0.907841749  | 0.686425491  |
| C  | -3.372703122 | 3.062805766  | 1.304500244  |
| C  | -2.980611303 | 3.639368659  | 2.514664231  |
| C  | -1.781974841 | 3.242297136  | 3.127342515  |
| C  | -0.975835493 | 2.266564657  | 2.532512454  |
| C  | -1.357261865 | 1.651810716  | 1.322890665  |
| C  | -2.575142206 | 2.072840368  | 0.706647185  |
| C  | -2.177208996 | -0.150129788 | -2.156473846 |
| C  | -2.922694692 | 1.408208439  | -0.557789831 |
| C  | -4.127475634 | 1.562004668  | -1.259208035 |
| H  | 1.592216444  | -0.965957970 | -3.216995543 |
| H  | 3.461953557  | -2.623354419 | -3.412730830 |
| H  | 3.635693328  | -4.449073842 | -1.673967651 |
| H  | 1.903295612  | -4.564969810 | 0.122276898  |
| H  | -2.339741029 | -0.805513255 | 1.886182725  |
| H  | -3.185655924 | -2.915860995 | 2.906796592  |
| H  | -2.092665735 | -5.101677211 | 2.235702082  |
| H  | -0.241671250 | -5.040683175 | 0.563796283  |
| H  | 4.722518174  | 1.351719419  | 0.907334629  |
| H  | 4.914391984  | 0.208029114  | 3.114057389  |
| H  | 2.852788226  | -0.874882624 | 4.108177684  |
| H  | 0.709263000  | -0.747394606 | 2.839014187  |
| H  | -3.490482053 | -0.632257348 | -3.791882765 |
| H  | -5.286216585 | 0.950761145  | -2.975623010 |

|   |              |              |              |
|---|--------------|--------------|--------------|
| H | -4.892680206 | 2.238939047  | -0.878712132 |
| H | -1.366580174 | -0.818427897 | -2.454664141 |
| H | 3.739211754  | 3.460482772  | -3.076912331 |
| H | 1.471959953  | 3.104856409  | -4.066148602 |
| H | 4.304303590  | 2.482651460  | -0.876076100 |
| H | -0.221294809 | 1.769271837  | -2.866850020 |
| H | -1.478291176 | 3.698808701  | 4.074016057  |
| H | -0.041463253 | 1.980382659  | 3.023834576  |
| H | -4.298777717 | 3.394692451  | 0.828738325  |
| H | -3.607659088 | 4.404956752  | 2.978654987  |

**(<sup>3</sup>MLCT/<sup>3</sup>MC<sub>ax 2</sub>)<sub>CI-NEB</sub> DFT B3LYP/DEF2-SVP CPCM.**

|    |              |              |              |
|----|--------------|--------------|--------------|
| C  | -4.065958979 | 1.320726467  | -1.494508912 |
| C  | -2.847487145 | 1.102276318  | -0.823979199 |
| N  | -1.981487030 | 0.197172365  | -1.322475918 |
| C  | -2.237226385 | -0.489412818 | -2.435152407 |
| C  | -2.413134017 | 1.792963404  | 0.422824007  |
| C  | -1.112681751 | 1.500968429  | 0.947447629  |
| C  | -0.714238706 | 2.155607376  | 2.136513757  |
| C  | -1.551992738 | 3.060436402  | 2.794016185  |
| C  | -2.814321883 | 3.350128667  | 2.259782358  |
| C  | -3.236745726 | 2.722429915  | 1.084033357  |
| Ir | 0.000053987  | 0.091072908  | -0.000025859 |
| N  | 1.981705396  | 0.195813579  | 1.322350613  |
| C  | 2.848120958  | 1.100667144  | 0.824115289  |
| C  | 4.066514516  | 1.318672051  | 1.494932421  |
| C  | 3.419767825  | -0.324085517 | 3.150774819  |
| C  | 2.236930153  | -0.490860621 | 2.435091102  |
| C  | 2.414256643  | 1.791589062  | -0.422719884 |
| C  | 1.113672179  | 1.500330082  | -0.947425835 |
| C  | 0.715713515  | 2.155133536  | -2.136563756 |
| C  | 1.554057761  | 3.059426146  | -2.794053277 |
| C  | 2.816486121  | 3.348457341  | -2.259698283 |
| C  | 3.238440162  | 2.720586300  | -1.083874513 |
| H  | -3.471015574 | 4.067295233  | 2.759512797  |
| H  | -4.225169557 | 2.965599482  | 0.689819540  |
| H  | 0.271793966  | 1.950219163  | 2.562827797  |
| H  | -1.221871453 | 3.546570194  | 3.717596459  |
| H  | -0.270391055 | 1.950272704  | -2.562965837 |
| H  | 4.226961854  | 2.963223264  | -0.689580398 |
| H  | 1.224324341  | 3.545644388  | -3.717726518 |
| H  | 3.473636824  | 4.065217838  | -2.759408505 |
| H  | -1.460538107 | -1.192652997 | -2.757781015 |
| C  | -4.348624161 | 0.601682546  | -2.657272448 |
| H  | -4.788441898 | 2.043343377  | -1.115205293 |
| H  | -5.294176560 | 0.761318900  | -3.180299305 |
| C  | -3.420166993 | -0.322195595 | -3.150562564 |
| H  | -3.602143273 | -0.900761259 | -4.058501812 |
| C  | 4.348668996  | 0.599475455  | 2.657725772  |
| H  | 1.459885849  | -1.193781912 | 2.757552145  |
| H  | 3.601330252  | -0.902741267 | 4.058740506  |
| H  | 5.294158220  | 0.758761041  | 3.180973287  |
| H  | 4.789313386  | 2.041095072  | 1.115858299  |
| C  | 2.566730842  | -2.745643558 | -2.389504104 |
| C  | -0.546591463 | -2.907830706 | 0.505769435  |
| C  | -1.116130418 | -4.083284574 | 1.018185331  |
| C  | -2.135122288 | -4.002209464 | 1.966889277  |
| C  | -2.568417850 | -2.744237232 | 2.389189209  |

|   |              |              |              |
|---|--------------|--------------|--------------|
| C | -1.964331739 | -1.616120727 | 1.837335283  |
| N | -0.983919357 | -1.691729253 | 0.921487924  |
| H | -0.772712180 | -5.060077808 | 0.678582888  |
| H | -2.586630159 | -4.911202620 | 2.371813182  |
| H | -3.362389608 | -2.629423617 | 3.129642563  |
| H | -2.273386190 | -0.612703448 | 2.138317931  |
| C | 0.544913659  | -2.908133394 | -0.505979259 |
| C | 1.113787894  | -4.083900827 | -1.018419526 |
| C | 2.132769506  | -4.003379159 | -1.967181858 |
| C | 1.963310120  | -1.617197877 | -1.837597759 |
| N | 0.982901504  | -1.692272796 | -0.921705526 |
| H | 0.769862399  | -5.060511867 | -0.678803112 |
| H | 2.583751572  | -4.912617893 | -2.372139804 |
| H | 3.360713814  | -2.631259249 | -3.130011167 |
| H | 2.272910026  | -0.613948093 | -2.138577506 |

(<sup>3</sup>MLCT/<sup>3</sup>MC<sub>ax 1</sub>)<sub>ts</sub> DFT B3LYP/DEF2-SVP CPCM.

|    |              |              |              |
|----|--------------|--------------|--------------|
| Ir | 0.061211000  | -0.050083000 | -0.199436000 |
| N  | -1.197092000 | -0.950241000 | 1.630375000  |
| N  | 1.544603000  | 0.620111000  | -1.607172000 |
| C  | -3.250812000 | -2.037370000 | 2.203589000  |
| C  | -2.385709000 | -1.473748000 | 1.249042000  |
| C  | -0.835203000 | -0.968038000 | 2.917765000  |
| C  | -2.668958000 | -1.388772000 | -0.195170000 |
| C  | -1.712934000 | -0.720578000 | -0.996685000 |
| C  | -1.965120000 | -0.566759000 | -2.371654000 |
| C  | -3.118514000 | -1.111129000 | -2.951652000 |
| C  | -4.052797000 | -1.786458000 | -2.156627000 |
| C  | -3.832166000 | -1.917501000 | -0.784359000 |
| C  | 2.215849000  | -0.406667000 | -2.217160000 |
| C  | 2.994392000  | -0.151159000 | -3.353532000 |
| C  | 2.397583000  | 2.182050000  | -3.215138000 |
| C  | 1.634666000  | 1.875773000  | -2.095023000 |
| C  | 2.024010000  | -1.723294000 | -1.587109000 |
| C  | 1.034688000  | -1.795347000 | -0.562203000 |
| C  | 0.838728000  | -3.035584000 | 0.073665000  |
| C  | 1.582460000  | -4.163995000 | -0.290205000 |
| C  | 2.546655000  | -4.078956000 | -1.303934000 |
| C  | 2.765914000  | -2.861493000 | -1.950747000 |
| H  | -4.957917000 | -2.204251000 | -2.604746000 |
| H  | -4.573138000 | -2.439094000 | -0.174193000 |
| H  | -1.253289000 | -0.031479000 | -3.007863000 |
| H  | -3.289416000 | -0.999820000 | -4.026299000 |
| H  | 0.088742000  | -3.130639000 | 0.861976000  |
| H  | 3.527348000  | -2.801175000 | -2.732259000 |
| H  | 1.406739000  | -5.117161000 | 0.217049000  |
| H  | 3.129365000  | -4.959384000 | -1.586942000 |
| H  | 0.134036000  | -0.527692000 | 3.159623000  |
| C  | -2.872708000 | -2.062260000 | 3.544246000  |
| H  | -4.212933000 | -2.449458000 | 1.897654000  |
| H  | -3.536346000 | -2.500503000 | 4.293973000  |
| C  | -1.639034000 | -1.518514000 | 3.915413000  |
| H  | -1.300821000 | -1.516812000 | 4.953467000  |
| C  | 3.089367000  | 1.146550000  | -3.857331000 |
| H  | 1.086403000  | 2.650345000  | -1.554977000 |
| H  | 2.452197000  | 3.213565000  | -3.568067000 |
| H  | 3.695173000  | 1.348162000  | -4.744038000 |
| H  | 3.520330000  | -0.970578000 | -3.844920000 |

|   |              |              |              |
|---|--------------|--------------|--------------|
| C | 3.341637000  | 0.992538000  | 2.627909000  |
| C | -0.219459000 | 2.735463000  | 1.130401000  |
| C | -0.729337000 | 3.997392000  | 1.486998000  |
| C | -1.888191000 | 4.468306000  | 0.880200000  |
| C | -2.520448000 | 3.670922000  | -0.081893000 |
| C | -1.972736000 | 2.426170000  | -0.378580000 |
| N | -0.858972000 | 1.958100000  | 0.211408000  |
| H | -0.223832000 | 4.598530000  | 2.242714000  |
| H | -2.295376000 | 5.444514000  | 1.154130000  |
| H | -3.427615000 | 3.999100000  | -0.592473000 |
| C | 1.025125000  | 2.188189000  | 1.687121000  |
| C | 1.947437000  | 2.948112000  | 2.430646000  |
| C | 3.108000000  | 2.350466000  | 2.907817000  |
| C | 2.403983000  | 0.297414000  | 1.878772000  |
| N | 1.271101000  | 0.874272000  | 1.421266000  |
| H | 1.759611000  | 4.005099000  | 2.621275000  |
| H | 3.829141000  | 2.932643000  | 3.485976000  |
| H | 4.234378000  | 0.479452000  | 2.990309000  |
| H | 2.540740000  | -0.758155000 | 1.632719000  |
| H | -2.440741000 | 1.770907000  | -1.115111000 |

(<sup>3</sup>MLCT/<sup>3</sup>MC<sub>eq 1</sub>)<sub>ts</sub> DFT B3LYP/DEF2-SVP CPCM.

|    |              |              |              |
|----|--------------|--------------|--------------|
| Ir | -0.302367000 | 0.452601000  | 0.146642000  |
| N  | 0.703177000  | -1.979909000 | -1.743052000 |
| N  | -0.904102000 | -1.727155000 | 0.642754000  |
| N  | 1.453090000  | 0.303625000  | 1.259979000  |
| N  | -2.040494000 | 0.645308000  | -0.981451000 |
| C  | 1.659469000  | -1.917635000 | -2.673548000 |
| C  | 3.076408000  | -3.426972000 | -1.459582000 |
| C  | 2.078492000  | -3.501753000 | -0.485509000 |
| C  | 0.899932000  | -2.759952000 | -0.669709000 |
| C  | -1.961920000 | -1.823326000 | 1.470408000  |
| C  | -2.382285000 | -3.029053000 | 2.027167000  |
| C  | -1.670411000 | -4.188350000 | 1.716196000  |
| C  | -0.582953000 | -4.093186000 | 0.849416000  |
| C  | -0.220766000 | -2.847601000 | 0.312290000  |
| C  | 2.863246000  | -2.624393000 | -2.582250000 |
| C  | 3.891086000  | 0.157134000  | 2.592803000  |
| C  | -3.445828000 | 0.097289000  | -2.840654000 |
| C  | -4.413148000 | 0.995731000  | -2.376889000 |
| C  | 3.336970000  | 2.059245000  | -1.399266000 |
| C  | 3.035299000  | 2.589689000  | -2.654693000 |
| C  | 1.738968000  | 2.458402000  | -3.178637000 |
| C  | 0.746779000  | 1.794259000  | -2.452644000 |
| C  | 1.026724000  | 1.241062000  | -1.185847000 |
| C  | 2.347738000  | 1.385982000  | -0.661276000 |
| C  | 1.532563000  | -0.265031000 | 2.479880000  |
| C  | 2.729989000  | -0.361478000 | 3.178926000  |
| C  | 3.810656000  | 0.744566000  | 1.333313000  |
| C  | 2.576873000  | 0.810430000  | 0.667542000  |
| C  | -3.400553000 | 3.123919000  | 1.412458000  |
| C  | -2.989611000 | 3.669309000  | 2.631274000  |
| C  | -1.792847000 | 3.241811000  | 3.225249000  |
| C  | -1.005101000 | 2.268628000  | 2.601516000  |
| C  | -1.401897000 | 1.692706000  | 1.379274000  |
| C  | -2.618910000 | 2.140606000  | 0.782554000  |
| C  | -2.269707000 | -0.049612000 | -2.112153000 |
| C  | -2.981790000 | 1.507029000  | -0.494512000 |

|   |              |              |              |
|---|--------------|--------------|--------------|
| C | -4.180099000 | 1.700056000  | -1.197463000 |
| H | 1.460997000  | -1.271561000 | -3.535690000 |
| H | 3.612093000  | -2.540252000 | -3.373032000 |
| H | 4.007531000  | -3.986720000 | -1.339673000 |
| H | 2.217557000  | -4.112380000 | 0.408686000  |
| H | -2.481465000 | -0.891637000 | 1.704381000  |
| H | -3.248832000 | -3.045273000 | 2.690854000  |
| H | -1.964275000 | -5.155964000 | 2.130373000  |
| H | -0.026163000 | -4.985204000 | 0.558574000  |
| H | 4.704165000  | 1.149166000  | 0.857041000  |
| H | 4.850005000  | 0.101901000  | 3.113701000  |
| H | 2.744128000  | -0.830652000 | 4.164155000  |
| H | 0.599336000  | -0.645441000 | 2.899492000  |
| H | -3.592725000 | -0.483064000 | -3.753161000 |
| H | -5.346383000 | 1.140142000  | -2.926808000 |
| H | -4.930048000 | 2.392044000  | -0.813045000 |
| H | -1.474418000 | -0.735656000 | -2.414128000 |
| H | 3.808002000  | 3.112079000  | -3.224420000 |
| H | 1.504100000  | 2.877586000  | -4.161484000 |
| H | 4.345445000  | 2.181003000  | -0.996319000 |
| H | -0.253782000 | 1.708710000  | -2.883713000 |
| H | -1.474123000 | 3.672121000  | 4.179215000  |
| H | -0.073254000 | 1.956161000  | 3.080535000  |
| H | -4.329607000 | 3.474894000  | 0.956680000  |
| H | -3.600956000 | 4.434018000  | 3.117284000  |

(<sup>3</sup>MC<sub>ax 1/S<sub>0</sub></sub>)<sub>stc-mecp</sub> DFT B3LYP/DEF2-SVP CPCM.

|    |              |              |              |
|----|--------------|--------------|--------------|
| Ir | 0.392263000  | -0.201739000 | -0.118266000 |
| N  | -0.162184000 | -1.047436000 | 2.398534000  |
| N  | 1.892987000  | 0.500132000  | -1.708804000 |
| C  | -1.946096000 | -2.121887000 | 3.574153000  |
| C  | -1.384438000 | -1.618301000 | 2.383053000  |
| C  | 0.524040000  | -0.964386000 | 3.540917000  |
| C  | -2.060151000 | -1.679394000 | 1.067051000  |
| C  | -1.429038000 | -1.103788000 | -0.064772000 |
| C  | -2.089589000 | -1.162899000 | -1.308291000 |
| C  | -3.330518000 | -1.794548000 | -1.448532000 |
| C  | -3.948585000 | -2.364192000 | -0.330050000 |
| C  | -3.318022000 | -2.299268000 | 0.911699000  |
| C  | 2.582069000  | -0.535847000 | -2.253347000 |
| C  | 3.421337000  | -0.306570000 | -3.358244000 |
| C  | 2.812727000  | 2.027864000  | -3.307783000 |
| C  | 1.998683000  | 1.737454000  | -2.216372000 |
| C  | 2.366995000  | -1.849557000 | -1.611677000 |
| C  | 1.382490000  | -1.927612000 | -0.581656000 |
| C  | 1.190339000  | -3.179178000 | 0.034813000  |
| C  | 1.929391000  | -4.306362000 | -0.340789000 |
| C  | 2.891572000  | -4.213548000 | -1.354436000 |
| C  | 3.106902000  | -2.988805000 | -1.985609000 |
| H  | -4.920700000 | -2.854973000 | -0.423285000 |
| H  | -3.817557000 | -2.746781000 | 1.773129000  |
| H  | -1.628305000 | -0.715874000 | -2.196462000 |
| H  | -3.812300000 | -1.835509000 | -2.429544000 |
| H  | 0.445071000  | -3.280399000 | 0.826752000  |
| H  | 3.865916000  | -2.923930000 | -2.768846000 |
| H  | 1.753235000  | -5.263201000 | 0.159912000  |
| H  | 3.473476000  | -5.090632000 | -1.649347000 |
| H  | 1.511431000  | -0.496787000 | 3.491194000  |

|   |              |              |              |
|---|--------------|--------------|--------------|
| C | -1.229681000 | -2.034729000 | 4.765548000  |
| H | -2.935931000 | -2.578028000 | 3.572734000  |
| H | -1.658216000 | -2.424594000 | 5.692585000  |
| C | 0.037986000  | -1.445886000 | 4.757276000  |
| H | 0.638908000  | -1.359117000 | 5.664878000  |
| C | 3.536069000  | 0.978081000  | -3.885382000 |
| H | 1.412775000  | 2.519208000  | -1.725267000 |
| H | 2.875098000  | 3.048126000  | -3.690670000 |
| H | 4.185191000  | 1.159368000  | -4.745966000 |
| H | 3.974437000  | -1.131418000 | -3.807694000 |
| C | 3.945536000  | 1.147464000  | 2.369399000  |
| C | 0.131191000  | 2.605240000  | 1.195301000  |
| C | -0.406696000 | 3.845271000  | 1.567973000  |
| C | -1.644490000 | 4.239978000  | 1.062247000  |
| C | -2.318475000 | 3.385236000  | 0.189228000  |
| C | -1.730947000 | 2.162457000  | -0.131589000 |
| N | -0.541829000 | 1.775740000  | 0.358002000  |
| H | 0.135388000  | 4.502702000  | 2.246935000  |
| H | -2.071943000 | 5.204470000  | 1.346054000  |
| H | -3.286934000 | 3.649584000  | -0.239540000 |
| C | 1.461766000  | 2.139783000  | 1.660057000  |
| C | 2.307740000  | 2.910972000  | 2.472011000  |
| C | 3.558418000  | 2.408329000  | 2.829552000  |
| C | 3.052984000  | 0.431327000  | 1.572989000  |
| N | 1.849997000  | 0.917216000  | 1.237494000  |
| H | 2.000815000  | 3.897173000  | 2.818661000  |
| H | 4.225505000  | 3.000745000  | 3.460140000  |
| H | 4.917165000  | 0.718412000  | 2.621102000  |
| H | 3.300301000  | -0.562472000 | 1.192141000  |
| H | -2.232267000 | 1.460212000  | -0.800240000 |

(<sup>3</sup>MC<sub>eq 1/S<sub>0</sub></sub>)<sub>stc-mecp</sub> DFT B3LYP/DEF2-SVP CPCM.

|    |              |              |              |
|----|--------------|--------------|--------------|
| Ir | -0.460030000 | -0.212255000 | -0.079492000 |
| N  | 2.001279000  | 1.660634000  | 1.495092000  |
| N  | -1.801672000 | 0.673597000  | 1.245484000  |
| N  | 0.881871000  | -1.127075000 | -1.391990000 |
| C  | 2.701219000  | -2.673097000 | -1.626785000 |
| C  | 1.750823000  | -2.018889000 | -0.828465000 |
| C  | 0.949043000  | -0.863127000 | -2.711672000 |
| C  | 1.584488000  | -2.191362000 | 0.619883000  |
| C  | 0.633443000  | -1.332831000 | 1.246784000  |
| C  | 0.413878000  | -1.477988000 | 2.630504000  |
| C  | 1.123549000  | -2.426600000 | 3.373229000  |
| C  | 2.066191000  | -3.256734000 | 2.747741000  |
| C  | 2.293541000  | -3.141866000 | 1.375010000  |
| C  | -3.124869000 | 0.421814000  | 1.022250000  |
| C  | -4.094324000 | 0.978329000  | 1.869300000  |
| C  | -2.344763000 | 2.080480000  | 3.105452000  |
| C  | -1.421928000 | 1.493013000  | 2.245450000  |
| C  | -3.392300000 | -0.420710000 | -0.153511000 |
| C  | -2.258807000 | -0.765150000 | -0.948725000 |
| C  | -2.462472000 | -1.574132000 | -2.082258000 |
| C  | -3.744796000 | -2.010396000 | -2.433763000 |
| C  | -4.851297000 | -1.656845000 | -1.648522000 |
| C  | -4.676129000 | -0.867246000 | -0.509618000 |
| H  | 2.618007000  | -3.998581000 | 3.330672000  |
| H  | 3.018710000  | -3.803549000 | 0.895013000  |
| H  | -0.313714000 | -0.844589000 | 3.143928000  |

|   |              |              |              |
|---|--------------|--------------|--------------|
| H | 0.942814000  | -2.520804000 | 4.448098000  |
| H | -1.617138000 | -1.871970000 | -2.708293000 |
| H | -5.545193000 | -0.607544000 | 0.099809000  |
| H | -3.883690000 | -2.630984000 | -3.323915000 |
| H | -5.851868000 | -2.001897000 | -1.921627000 |
| H | 0.227468000  | -0.141976000 | -3.100574000 |
| C | 2.767472000  | -2.402136000 | -2.991090000 |
| H | 3.389913000  | -3.385306000 | -1.171474000 |
| H | 3.507784000  | -2.906897000 | -3.616594000 |
| C | 1.877928000  | -1.475007000 | -3.546043000 |
| H | 1.893691000  | -1.228389000 | -4.609057000 |
| C | -3.704122000 | 1.807947000  | 2.918435000  |
| H | -0.346351000 | 1.672506000  | 2.330157000  |
| H | -1.996680000 | 2.737872000  | 3.904096000  |
| H | -4.455781000 | 2.246833000  | 3.579232000  |
| H | -5.150251000 | 0.769638000  | 1.695051000  |
| C | -0.492938000 | 3.603253000  | -2.346614000 |
| C | 2.405141000  | 1.844250000  | 0.229061000  |
| C | 3.719225000  | 1.582334000  | -0.190099000 |
| C | 4.639623000  | 1.110077000  | 0.748368000  |
| C | 4.221164000  | 0.927702000  | 2.067697000  |
| C | 2.890190000  | 1.217079000  | 2.387960000  |
| H | 4.009183000  | 1.735505000  | -1.231700000 |
| H | 5.668000000  | 0.888818000  | 0.451103000  |
| H | 4.906759000  | 0.567875000  | 2.838195000  |
| C | 1.404821000  | 2.419856000  | -0.720954000 |
| C | 1.741399000  | 3.556798000  | -1.471634000 |
| C | 0.788256000  | 4.154243000  | -2.295346000 |
| C | -0.754763000 | 2.461178000  | -1.593737000 |
| N | 0.171287000  | 1.871907000  | -0.812660000 |
| H | 2.742969000  | 3.980424000  | -1.379737000 |
| H | 1.039661000  | 5.044741000  | -2.876803000 |
| H | -1.283104000 | 4.038154000  | -2.961529000 |
| H | -1.737265000 | 1.984774000  | -1.624503000 |
| H | 2.528201000  | 1.082996000  | 3.413319000  |

(<sup>3</sup>MC<sub>ax 2/S<sub>0</sub></sub>)<sub>stc-mecp</sub> DFT B3LYP/DEF2-SVP CPCM.

|    |              |              |              |
|----|--------------|--------------|--------------|
| C  | 3.883264000  | 2.027026000  | 1.282836000  |
| C  | 3.004383000  | 1.173251000  | 0.586585000  |
| N  | 2.655303000  | -0.023952000 | 1.095018000  |
| C  | 3.161062000  | -0.411843000 | 2.268586000  |
| C  | 2.419613000  | 1.560649000  | -0.730376000 |
| C  | 1.130871000  | 1.084504000  | -1.151413000 |
| C  | 0.656973000  | 1.502604000  | -2.424753000 |
| C  | 1.388995000  | 2.358190000  | -3.245529000 |
| C  | 2.641660000  | 2.816512000  | -2.816324000 |
| C  | 3.144783000  | 2.420408000  | -1.572726000 |
| Ir | 0.002890000  | -0.139972000 | -0.029254000 |
| N  | -2.436887000 | 0.231008000  | -1.166836000 |
| C  | -2.854994000 | 1.390155000  | -0.621954000 |
| C  | -3.860180000 | 2.152866000  | -1.249252000 |
| C  | -4.000738000 | 0.477340000  | -2.973352000 |
| C  | -2.987694000 | -0.210834000 | -2.299476000 |
| C  | -2.202061000 | 1.816317000  | 0.649832000  |
| C  | -0.943899000 | 1.256443000  | 1.057698000  |
| C  | -0.386841000 | 1.697727000  | 2.287260000  |
| C  | -1.010945000 | 2.659637000  | 3.079556000  |
| C  | -2.236965000 | 3.198130000  | 2.666429000  |



|   |              |              |              |
|---|--------------|--------------|--------------|
| C | -2.820789000 | 2.778164000  | 1.467063000  |
| H | 3.236015000  | 3.475699000  | -3.454755000 |
| H | 4.134125000  | 2.771974000  | -1.272210000 |
| H | -0.318953000 | 1.149378000  | -2.766678000 |
| H | 0.991077000  | 2.667292000  | -4.215928000 |
| H | 0.566170000  | 1.276603000  | 2.617275000  |
| H | -3.787332000 | 3.199927000  | 1.185599000  |
| H | -0.551476000 | 2.987278000  | 4.016059000  |
| H | -2.748751000 | 3.940986000  | 3.284107000  |
| H | 2.845728000  | -1.396177000 | 2.634083000  |
| C | 4.408903000  | 1.617240000  | 2.508833000  |
| H | 4.136656000  | 3.009665000  | 0.882391000  |
| H | 5.087309000  | 2.271926000  | 3.062260000  |
| C | 4.047151000  | 0.368066000  | 3.018157000  |
| H | 4.434996000  | 0.004245000  | 3.972293000  |
| C | -4.436880000 | 1.688891000  | -2.431992000 |
| H | -2.604159000 | -1.160104000 | -2.690636000 |
| H | -4.426384000 | 0.074878000  | -3.895148000 |
| H | -5.215772000 | 2.274014000  | -2.927916000 |
| H | -4.179347000 | 3.108245000  | -0.832048000 |
| C | -2.334865000 | -2.762356000 | 2.797997000  |
| C | 0.250508000  | -3.196093000 | -0.525286000 |
| C | 0.634904000  | -4.414109000 | -1.103123000 |
| C | 1.502911000  | -4.414574000 | -2.192863000 |
| C | 1.968303000  | -3.192647000 | -2.681118000 |
| C | 1.545502000  | -2.019009000 | -2.061612000 |
| N | 0.706022000  | -2.015235000 | -1.009504000 |
| H | 0.259163000  | -5.356483000 | -0.706052000 |
| H | 1.809766000  | -5.357084000 | -2.652009000 |
| H | 2.650788000  | -3.136473000 | -3.531163000 |
| H | 1.888651000  | -1.047089000 | -2.416424000 |
| C | -0.661286000 | -3.104747000 | 0.635015000  |
| C | -1.201225000 | -4.229506000 | 1.274282000  |
| C | -2.046672000 | -4.058578000 | 2.368442000  |
| C | -1.765310000 | -1.689151000 | 2.116650000  |
| N | -0.947276000 | -1.850469000 | 1.060432000  |
| H | -0.961366000 | -5.232521000 | 0.923161000  |
| H | -2.472371000 | -4.926882000 | 2.876497000  |
| H | -2.991438000 | -2.572260000 | 3.649059000  |
| H | -1.969169000 | -0.663412000 | 2.424254000  |

**Complex 2 in CH<sub>2</sub>Cl<sub>2</sub>.**

(S<sub>0</sub>)<sub>min</sub> DFT B3LYP/DEF2-SVP CPCM.

|    |              |              |              |
|----|--------------|--------------|--------------|
| Ir | 0.368764000  | -0.157354000 | 0.103613000  |
| N  | -0.753324000 | -0.794563000 | 1.739217000  |
| N  | 1.466471000  | 0.258059000  | -1.636883000 |
| C  | -2.551134000 | -2.196959000 | 2.484634000  |
| C  | -1.766021000 | -1.666596000 | 1.446771000  |
| C  | -0.525863000 | -0.431418000 | 3.016838000  |
| C  | -1.940216000 | -1.946837000 | 0.018365000  |
| C  | -1.061560000 | -1.243139000 | -0.852202000 |
| C  | -1.213861000 | -1.458536000 | -2.234595000 |
| C  | -2.186421000 | -2.333419000 | -2.732858000 |
| C  | -3.036031000 | -3.028063000 | -1.859771000 |
| C  | -2.913175000 | -2.831285000 | -0.484977000 |
| C  | 2.385566000  | -0.694557000 | -1.977319000 |
| C  | 3.183040000  | -0.525665000 | -3.121198000 |

|   |              |              |              |
|---|--------------|--------------|--------------|
| C | 2.072035000  | 1.560365000  | -3.562252000 |
| C | 1.313871000  | 1.345943000  | -2.416642000 |
| C | 2.425948000  | -1.852258000 | -1.077336000 |
| C | 1.490042000  | -1.831276000 | -0.006591000 |
| C | 1.483339000  | -2.926199000 | 0.876364000  |
| C | 2.371529000  | -3.995968000 | 0.709743000  |
| C | 3.291175000  | -4.002021000 | -0.347827000 |
| C | 3.316862000  | -2.930323000 | -1.239332000 |
| H | -3.789079000 | -3.717165000 | -2.250796000 |
| H | -3.578668000 | -3.370159000 | 0.194214000  |
| H | -0.561468000 | -0.943614000 | -2.944614000 |
| H | -2.279243000 | -2.481308000 | -3.813307000 |
| H | 0.781365000  | -2.956663000 | 1.712647000  |
| H | 4.035303000  | -2.936654000 | -2.062596000 |
| H | 2.343928000  | -4.834401000 | 1.412307000  |
| H | 3.983119000  | -4.838355000 | -0.475466000 |
| H | 0.290614000  | 0.271630000  | 3.184528000  |
| C | -2.309391000 | -1.826722000 | 3.803566000  |
| H | -3.353372000 | -2.896389000 | 2.248188000  |
| H | -2.919682000 | -2.237595000 | 4.611663000  |
| C | -1.278718000 | -0.919956000 | 4.078148000  |
| H | -1.054165000 | -0.594989000 | 5.095497000  |
| C | 3.030522000  | 0.605365000  | -3.917189000 |
| H | 0.550807000  | 2.061946000  | -2.113612000 |
| H | 1.906346000  | 2.458949000  | -4.158967000 |
| H | 3.647551000  | 0.738724000  | -4.809210000 |
| H | 3.916330000  | -1.288175000 | -3.384759000 |
| C | 3.888539000  | 1.123817000  | 2.566932000  |
| C | 0.574491000  | 2.901985000  | 0.592079000  |
| C | 0.525008000  | 4.270880000  | 0.301717000  |
| C | -0.591264000 | 4.789966000  | -0.349198000 |
| C | -1.651211000 | 3.936403000  | -0.631281000 |
| C | -1.562513000 | 2.573851000  | -0.291415000 |
| N | -0.434864000 | 2.054648000  | 0.250013000  |
| H | 1.358968000  | 4.922509000  | 0.558390000  |
| H | -0.640689000 | 5.850273000  | -0.607772000 |
| H | -2.569677000 | 4.312391000  | -1.084194000 |
| C | 1.753291000  | 2.321764000  | 1.287182000  |
| C | 2.681731000  | 3.116420000  | 1.978348000  |
| C | 3.760235000  | 2.512751000  | 2.622279000  |
| C | 2.926876000  | 0.395389000  | 1.870681000  |
| N | 1.885642000  | 0.976687000  | 1.249974000  |
| H | 2.556771000  | 4.197348000  | 2.030631000  |
| H | 4.486637000  | 3.121870000  | 3.165424000  |
| H | 4.714358000  | 0.603571000  | 3.055779000  |
| H | 2.983513000  | -0.692581000 | 1.804005000  |
| C | -3.405709000 | 1.173558000  | 0.663838000  |
| C | -4.644801000 | 0.538478000  | 0.543136000  |
| C | -2.789549000 | 1.746367000  | -0.461679000 |
| H | -5.120276000 | 0.108191000  | 1.428569000  |
| C | -5.276050000 | 0.456633000  | -0.702668000 |
| C | -3.435951000 | 1.672466000  | -1.708013000 |
| H | -6.244671000 | -0.041902000 | -0.795163000 |
| H | -2.969197000 | 2.122962000  | -2.588016000 |
| C | -4.665802000 | 1.020125000  | -1.829309000 |
| H | -5.152385000 | 0.957900000  | -2.806306000 |
| H | -2.925511000 | 1.252872000  | 1.641594000  |

(<sup>3</sup>MLCT)<sub>min</sub> DFT B3LYP/DEF2-SVP CPCM.

|    |              |              |              |
|----|--------------|--------------|--------------|
| Ir | 0.424150000  | -0.202187000 | 0.088337000  |
| N  | -0.788057000 | -0.957374000 | 1.605802000  |
| N  | 1.653131000  | 0.369969000  | -1.508348000 |
| C  | -2.662905000 | -2.362464000 | 2.106628000  |
| C  | -1.820581000 | -1.739804000 | 1.175670000  |
| C  | -0.592266000 | -0.749937000 | 2.919048000  |
| C  | -1.941886000 | -1.827798000 | -0.283908000 |
| C  | -0.973592000 | -1.074436000 | -1.031100000 |
| C  | -1.047609000 | -1.114638000 | -2.446078000 |
| C  | -2.027750000 | -1.864485000 | -3.090409000 |
| C  | -2.959877000 | -2.603622000 | -2.340366000 |
| C  | -2.918089000 | -2.584388000 | -0.941562000 |
| C  | 2.630591000  | -0.529698000 | -1.822326000 |
| C  | 3.542007000  | -0.243931000 | -2.849524000 |
| C  | 2.420107000  | 1.851763000  | -3.226331000 |
| C  | 1.547588000  | 1.523076000  | -2.193295000 |
| C  | 2.609049000  | -1.763076000 | -1.024096000 |
| C  | 1.592615000  | -1.853722000 | -0.029708000 |
| C  | 1.522277000  | -3.015076000 | 0.760292000  |
| C  | 2.416949000  | -4.069677000 | 0.557894000  |
| C  | 3.409016000  | -3.975743000 | -0.429436000 |
| C  | 3.504829000  | -2.827502000 | -1.218051000 |
| H  | -3.723319000 | -3.196851000 | -2.849981000 |
| H  | -3.651957000 | -3.165000000 | -0.378654000 |
| H  | -0.327085000 | -0.555297000 | -3.046055000 |
| H  | -2.071691000 | -1.884866000 | -4.182608000 |
| H  | 0.763842000  | -3.110102000 | 1.540036000  |
| H  | 4.280182000  | -2.769643000 | -1.985029000 |
| H  | 2.342237000  | -4.970840000 | 1.172628000  |
| H  | 4.110676000  | -4.799368000 | -0.582900000 |
| H  | 0.244661000  | -0.105017000 | 3.189027000  |
| C  | -2.455474000 | -2.160430000 | 3.469937000  |
| H  | -3.480426000 | -2.995113000 | 1.760354000  |
| H  | -3.108624000 | -2.641362000 | 4.201952000  |
| C  | -1.408458000 | -1.332738000 | 3.885586000  |
| H  | -1.215091000 | -1.138733000 | 4.941883000  |
| C  | 3.438704000  | 0.952523000  | -3.554925000 |
| H  | 0.735553000  | 2.190161000  | -1.905031000 |
| H  | 2.295028000  | 2.797352000  | -3.756342000 |
| H  | 4.144594000  | 1.179716000  | -4.357395000 |
| H  | 4.325803000  | -0.961114000 | -3.093038000 |
| C  | 4.006894000  | 0.648260000  | 2.720673000  |
| C  | 0.833766000  | 2.718006000  | 0.853922000  |
| C  | 0.775109000  | 4.126951000  | 0.656732000  |
| C  | -0.330982000 | 4.707213000  | 0.085030000  |
| C  | -1.440423000 | 3.881881000  | -0.242020000 |
| C  | -1.370279000 | 2.510091000  | -0.027432000 |
| N  | -0.231570000 | 1.906949000  | 0.439168000  |
| H  | 1.628789000  | 4.741896000  | 0.942794000  |
| H  | -0.372258000 | 5.785655000  | -0.085078000 |
| H  | -2.375144000 | 4.315731000  | -0.598816000 |
| C  | 1.955740000  | 2.071745000  | 1.459527000  |
| C  | 3.015835000  | 2.764414000  | 2.118183000  |
| C  | 4.027591000  | 2.067184000  | 2.740566000  |
| C  | 2.972429000  | 0.022849000  | 2.046816000  |
| N  | 1.979542000  | 0.688099000  | 1.418360000  |

|   |              |              |              |
|---|--------------|--------------|--------------|
| H | 3.008349000  | 3.854041000  | 2.150989000  |
| H | 4.829107000  | 2.604241000  | 3.254369000  |
| H | 4.779264000  | 0.053079000  | 3.210163000  |
| H | 2.927984000  | -1.066838000 | 1.996586000  |
| C | -3.309782000 | 1.196407000  | 0.881241000  |
| C | -4.580913000 | 0.633428000  | 0.733124000  |
| C | -2.635536000 | 1.740205000  | -0.226461000 |
| H | -5.099227000 | 0.229716000  | 1.607179000  |
| C | -5.193289000 | 0.596724000  | -0.524975000 |
| C | -3.262321000 | 1.705811000  | -1.484706000 |
| H | -6.188207000 | 0.157757000  | -0.639179000 |
| H | -2.753193000 | 2.137038000  | -2.350531000 |
| C | -4.528340000 | 1.130763000  | -1.634403000 |
| H | -4.999494000 | 1.106029000  | -2.620837000 |
| H | -2.848294000 | 1.246146000  | 1.870439000  |

( $^3\text{MC}_{\text{ax } 1}$ )<sub>min</sub> DFT B3LYP/DEF2-SVP CPCM.

|    |              |              |              |
|----|--------------|--------------|--------------|
| Ir | 0.435646000  | -0.212008000 | -0.133198000 |
| N  | -0.270487000 | -0.915497000 | 2.317654000  |
| N  | 1.871767000  | 0.524099000  | -1.765114000 |
| C  | -2.215888000 | -1.724600000 | 3.447013000  |
| C  | -1.509991000 | -1.446895000 | 2.258381000  |
| C  | 0.306951000  | -0.684590000 | 3.500499000  |
| C  | -2.029207000 | -1.738979000 | 0.904118000  |
| C  | -1.280865000 | -1.327453000 | -0.228707000 |
| C  | -1.734740000 | -1.714988000 | -1.504500000 |
| C  | -2.915680000 | -2.444102000 | -1.670518000 |
| C  | -3.670433000 | -2.817437000 | -0.551567000 |
| C  | -3.223456000 | -2.469866000 | 0.721013000  |
| C  | 2.557024000  | -0.499484000 | -2.337617000 |
| C  | 3.371434000  | -0.248166000 | -3.457591000 |
| C  | 2.782148000  | 2.088039000  | -3.334516000 |
| C  | 1.986478000  | 1.775509000  | -2.236496000 |
| C  | 2.389315000  | -1.815177000 | -1.691087000 |
| C  | 1.459155000  | -1.905273000 | -0.614638000 |
| C  | 1.340333000  | -3.146279000 | 0.038947000  |
| C  | 2.095516000  | -4.257054000 | -0.351838000 |
| C  | 2.995531000  | -4.158901000 | -1.421397000 |
| C  | 3.140759000  | -2.941638000 | -2.084617000 |
| H  | -4.593432000 | -3.390940000 | -0.669854000 |
| H  | -3.805811000 | -2.792441000 | 1.586504000  |
| H  | -1.160862000 | -1.441238000 | -2.394484000 |
| H  | -3.241930000 | -2.725279000 | -2.676053000 |
| H  | 0.638774000  | -3.251014000 | 0.869873000  |
| H  | 3.855523000  | -2.869355000 | -2.907816000 |
| H  | 1.977807000  | -5.207166000 | 0.178043000  |
| H  | 3.584964000  | -5.025367000 | -1.732181000 |
| H  | 1.322384000  | -0.278830000 | 3.484045000  |
| C  | -1.620082000 | -1.470124000 | 4.679606000  |
| H  | -3.224473000 | -2.135984000 | 3.408634000  |
| H  | -2.162396000 | -1.682491000 | 5.604726000  |
| C  | -0.323716000 | -0.947286000 | 4.716589000  |
| H  | 0.189175000  | -0.744708000 | 5.659029000  |
| C  | 3.480062000  | 1.046555000  | -3.958387000 |
| H  | 1.427025000  | 2.550156000  | -1.704954000 |
| H  | 2.850900000  | 3.118778000  | -3.687125000 |
| H  | 4.110001000  | 1.244685000  | -4.829407000 |
| H  | 3.915137000  | -1.064483000 | -3.933336000 |

|   |              |              |              |
|---|--------------|--------------|--------------|
| C | 4.168972000  | 0.988468000  | 2.101514000  |
| C | 0.194508000  | 2.392915000  | 1.505966000  |
| C | -0.367590000 | 3.412323000  | 2.282736000  |
| C | -1.666326000 | 3.836882000  | 2.011855000  |
| C | -2.344443000 | 3.266007000  | 0.942229000  |
| C | -1.733655000 | 2.248536000  | 0.185514000  |
| N | -0.502042000 | 1.784863000  | 0.507147000  |
| H | 0.193434000  | 3.861723000  | 3.100702000  |
| H | -2.130440000 | 4.621808000  | 2.613385000  |
| H | -3.337584000 | 3.617810000  | 0.660818000  |
| C | 1.592342000  | 1.941571000  | 1.744920000  |
| C | 2.501629000  | 2.674806000  | 2.524477000  |
| C | 3.797814000  | 2.192860000  | 2.703780000  |
| C | 3.222067000  | 0.315851000  | 1.332388000  |
| N | 1.977241000  | 0.785739000  | 1.161822000  |
| H | 2.211116000  | 3.622167000  | 2.976978000  |
| H | 4.512075000  | 2.758255000  | 3.307005000  |
| H | 5.172090000  | 0.573839000  | 2.216594000  |
| H | 3.458326000  | -0.627600000 | 0.835459000  |
| C | -3.820014000 | 1.452763000  | -0.964345000 |
| C | -4.521049000 | 1.099866000  | -2.120002000 |
| C | -2.446429000 | 1.752907000  | -1.024205000 |
| H | -5.585252000 | 0.858420000  | -2.054475000 |
| C | -3.865146000 | 1.057557000  | -3.355782000 |
| C | -1.796592000 | 1.705405000  | -2.270286000 |
| H | -4.416710000 | 0.790864000  | -4.261309000 |
| H | -0.741256000 | 1.969201000  | -2.341643000 |
| C | -2.501999000 | 1.363575000  | -3.427016000 |
| H | -1.984196000 | 1.344916000  | -4.389695000 |
| H | -4.341249000 | 1.482976000  | -0.004206000 |

(<sup>3</sup>MC<sub>eq 1</sub>)<sub>min</sub> DFT B3LYP/DEF2-SVP CPCM.

|    |              |              |              |
|----|--------------|--------------|--------------|
| Ir | 0.874471000  | -0.938162000 | 0.240499000  |
| N  | 1.814841000  | 1.027437000  | 0.958312000  |
| N  | -0.848752000 | 2.270900000  | 0.253875000  |
| N  | 1.535843000  | -0.533226000 | -1.692015000 |
| N  | 0.183176000  | -1.385988000 | 2.156387000  |
| C  | -2.297139000 | 3.584731000  | -3.519394000 |
| C  | -1.840125000 | 3.322193000  | -2.225728000 |
| C  | -3.592315000 | 3.212003000  | -3.898495000 |
| C  | -2.672267000 | 2.687411000  | -1.283360000 |
| C  | -4.427858000 | 2.578436000  | -2.971801000 |
| C  | -3.974216000 | 2.321640000  | -1.674810000 |
| C  | 3.162527000  | 1.034084000  | 0.961682000  |
| C  | 3.231866000  | 3.017245000  | 2.306336000  |
| C  | 1.837032000  | 3.021416000  | 2.286285000  |
| C  | 1.147541000  | 2.022600000  | 1.584534000  |
| C  | -2.173852000 | 2.432853000  | 0.097707000  |
| C  | -3.048218000 | 2.398325000  | 1.203205000  |
| C  | -2.524190000 | 2.204180000  | 2.479263000  |
| C  | -1.143307000 | 2.060190000  | 2.634123000  |
| C  | -0.346030000 | 2.095033000  | 1.482097000  |
| C  | 3.909296000  | 2.010970000  | 1.615486000  |
| C  | 2.523156000  | -0.105600000 | -4.251489000 |
| C  | 0.435907000  | -1.625241000 | 4.529758000  |
| C  | -0.912430000 | -1.984389000 | 4.642037000  |
| C  | 3.781897000  | -3.476839000 | -1.620919000 |
| C  | 4.124637000  | -4.453822000 | -0.683316000 |

|   |              |              |              |
|---|--------------|--------------|--------------|
| C | 3.572313000  | -4.414435000 | 0.605204000  |
| C | 2.677176000  | -3.398897000 | 0.958426000  |
| C | 2.324900000  | -2.394938000 | 0.036787000  |
| C | 2.887907000  | -2.450136000 | -1.273028000 |
| C | 1.106050000  | 0.516670000  | -2.418081000 |
| C | 1.574672000  | 0.765400000  | -3.704138000 |
| C | 2.977454000  | -1.181705000 | -3.492217000 |
| C | 2.477302000  | -1.383381000 | -2.197526000 |
| C | -3.187057000 | -2.129390000 | 0.815541000  |
| C | -3.787172000 | -2.121289000 | -0.445220000 |
| C | -3.052892000 | -1.711072000 | -1.568724000 |
| C | -1.723808000 | -1.299957000 | -1.432635000 |
| C | -1.098140000 | -1.285547000 | -0.169747000 |
| C | -1.850436000 | -1.720721000 | 0.963392000  |
| C | 0.944183000  | -1.338111000 | 3.267843000  |
| C | -1.138390000 | -1.724118000 | 2.246373000  |
| C | -1.699098000 | -2.034881000 | 3.494359000  |
| H | -4.634861000 | 1.810980000  | -0.970528000 |
| H | -1.640801000 | 4.088887000  | -4.234129000 |
| H | -0.834881000 | 3.624653000  | -1.926143000 |
| H | -3.949543000 | 3.416001000  | -4.911528000 |
| H | -5.438550000 | 2.277377000  | -3.260383000 |
| H | 3.655201000  | 0.214026000  | 0.434274000  |
| H | 4.999672000  | 1.968363000  | 1.584408000  |
| H | 3.780091000  | 3.795641000  | 2.842867000  |
| H | 1.270609000  | 3.808094000  | 2.788085000  |
| H | -4.119858000 | 2.550543000  | 1.066826000  |
| H | -3.184066000 | 2.178227000  | 3.350227000  |
| H | -0.693568000 | 1.917332000  | 3.618633000  |
| H | 3.726350000  | -1.863968000 | -3.895455000 |
| H | 2.910852000  | 0.056195000  | -5.260279000 |
| H | 1.196215000  | 1.625688000  | -4.258779000 |
| H | 0.368567000  | 1.162798000  | -1.936106000 |
| H | 1.090839000  | -1.572044000 | 5.401085000  |
| H | -1.346242000 | -2.221454000 | 5.616452000  |
| H | -2.752335000 | -2.309211000 | 3.560347000  |
| H | 1.992083000  | -1.065250000 | 3.127820000  |
| H | 4.819954000  | -5.250821000 | -0.958951000 |
| H | 3.841101000  | -5.181804000 | 1.337032000  |
| H | 4.211580000  | -3.524475000 | -2.624559000 |
| H | 2.255442000  | -3.396265000 | 1.966894000  |
| H | -3.522938000 | -1.710142000 | -2.556388000 |
| H | -1.176336000 | -0.985063000 | -2.324104000 |
| H | -3.764932000 | -2.463703000 | 1.680493000  |
| H | -4.826100000 | -2.442477000 | -0.554980000 |

(<sup>3</sup>MC<sub>ax 2</sub>)<sub>min</sub> DFT B3LYP/DEF2-SVP CPCM.

|    |              |              |              |
|----|--------------|--------------|--------------|
| Ir | 0.466432000  | -0.536812000 | 0.395148000  |
| N  | -1.096878000 | -0.646164000 | 1.985997000  |
| N  | 1.587967000  | 0.528204000  | -1.672233000 |
| C  | -3.117111000 | -1.759108000 | 2.615221000  |
| C  | -2.139190000 | -1.455310000 | 1.651823000  |
| C  | -0.983308000 | -0.153613000 | 3.231266000  |
| C  | -2.125125000 | -1.959379000 | 0.267163000  |
| C  | -1.008636000 | -1.596150000 | -0.539893000 |
| C  | -0.986220000 | -2.073302000 | -1.864556000 |
| C  | -2.011891000 | -2.875206000 | -2.373923000 |
| C  | -3.101520000 | -3.227435000 | -1.565273000 |

|   |              |              |              |
|---|--------------|--------------|--------------|
| C | -3.156231000 | -2.768274000 | -0.249870000 |
| C | 2.473630000  | -0.340301000 | -2.207124000 |
| C | 3.210514000  | 0.016355000  | -3.354009000 |
| C | 2.118804000  | 2.160379000  | -3.350391000 |
| C | 1.424318000  | 1.737980000  | -2.216801000 |
| C | 2.608253000  | -1.638710000 | -1.512646000 |
| C | 1.816846000  | -1.875590000 | -0.362826000 |
| C | 1.955182000  | -3.104760000 | 0.309495000  |
| C | 2.847581000  | -4.083825000 | -0.141653000 |
| C | 3.626932000  | -3.846425000 | -1.280059000 |
| C | 3.506656000  | -2.632402000 | -1.954348000 |
| H | -3.904280000 | -3.856114000 | -1.959293000 |
| H | -4.011120000 | -3.042279000 | 0.372797000  |
| H | -0.146091000 | -1.820603000 | -2.516021000 |
| H | -1.960010000 | -3.232656000 | -3.406867000 |
| H | 1.354509000  | -3.314081000 | 1.200898000  |
| H | 4.125221000  | -2.461007000 | -2.837744000 |
| H | 2.930894000  | -5.031944000 | 0.397376000  |
| H | 4.327381000  | -4.604302000 | -1.640000000 |
| H | -0.115908000 | 0.480455000  | 3.430143000  |
| C | -3.008395000 | -1.239345000 | 3.902666000  |
| H | -3.955733000 | -2.405356000 | 2.355675000  |
| H | -3.767232000 | -1.474145000 | 4.653474000  |
| C | -1.918410000 | -0.421784000 | 4.225343000  |
| H | -1.793825000 | 0.003654000  | 5.222737000  |
| C | 3.028440000  | 1.271056000  | -3.929778000 |
| H | 0.709782000  | 2.404613000  | -1.728468000 |
| H | 1.946615000  | 3.157513000  | -3.760514000 |
| H | 3.595179000  | 1.552992000  | -4.820934000 |
| H | 3.923375000  | -0.682360000 | -3.791640000 |
| C | 4.349811000  | 0.479389000  | 2.372680000  |
| C | 0.780557000  | 2.523749000  | 1.316859000  |
| C | 0.543194000  | 3.819299000  | 1.798214000  |
| C | -0.691320000 | 4.416727000  | 1.564709000  |
| C | -1.652219000 | 3.704838000  | 0.858110000  |
| C | -1.365872000 | 2.406831000  | 0.392591000  |
| N | -0.162599000 | 1.833665000  | 0.628264000  |
| H | 1.301627000  | 4.348009000  | 2.373164000  |
| H | -0.898829000 | 5.424646000  | 1.931622000  |
| H | -2.624195000 | 4.147569000  | 0.638292000  |
| C | 2.069235000  | 1.846327000  | 1.620905000  |
| C | 3.191169000  | 2.559432000  | 2.074469000  |
| C | 4.343756000  | 1.872524000  | 2.448852000  |
| C | 3.216540000  | -0.161940000 | 1.878683000  |
| N | 2.111249000  | 0.499875000  | 1.492663000  |
| H | 3.171076000  | 3.647033000  | 2.127012000  |
| H | 5.221165000  | 2.420697000  | 2.800037000  |
| H | 5.218207000  | -0.110003000 | 2.672775000  |
| H | 3.192309000  | -1.247353000 | 1.774835000  |
| C | -3.743212000 | 1.682772000  | 0.148046000  |
| C | -4.805045000 | 1.168986000  | -0.599678000 |
| C | -2.439403000 | 1.720839000  | -0.384601000 |
| H | -5.807971000 | 1.137008000  | -0.165652000 |
| C | -4.585428000 | 0.706498000  | -1.902284000 |
| C | -2.227260000 | 1.235013000  | -1.685043000 |
| H | -5.417831000 | 0.318651000  | -2.495565000 |
| H | -1.229872000 | 1.263021000  | -2.122493000 |
| C | -3.295503000 | 0.743185000  | -2.440672000 |

|   |              |             |              |
|---|--------------|-------------|--------------|
| H | -3.115227000 | 0.384409000 | -3.457062000 |
| H | -3.925506000 | 2.053849000 | 1.159907000  |

(<sup>3</sup>MC<sub>eq 2</sub>)<sub>min</sub> DFT B3LYP/DEF2-SVP CPCM.

|    |              |              |              |
|----|--------------|--------------|--------------|
| Ir | -0.097498000 | -0.412221000 | 0.142767000  |
| N  | -0.766091000 | 0.785076000  | -3.113895000 |
| N  | 0.295760000  | 1.838042000  | -0.590621000 |
| N  | -1.768027000 | 0.345435000  | 1.152543000  |
| N  | 1.523738000  | -1.281442000 | -0.828898000 |
| H  | -0.810068000 | -0.532070000 | -4.711742000 |
| C  | 3.709508000  | 1.810697000  | 2.811708000  |
| C  | 2.535672000  | 2.274622000  | 2.212244000  |
| C  | 4.665618000  | 1.129212000  | 2.049786000  |
| C  | 2.292252000  | 2.041556000  | 0.846082000  |
| C  | 4.441427000  | 0.912823000  | 0.685356000  |
| C  | 3.261918000  | 1.362832000  | 0.086387000  |
| C  | -1.417106000 | 0.113524000  | -4.066414000 |
| C  | -3.534364000 | 1.031357000  | -3.413664000 |
| C  | -2.861151000 | 1.741392000  | -2.417345000 |
| C  | -1.469022000 | 1.590550000  | -2.301156000 |
| C  | 1.092804000  | 2.621260000  | 0.178463000  |
| C  | 0.842471000  | 3.996197000  | 0.321499000  |
| C  | -0.220222000 | 4.577149000  | -0.363037000 |
| C  | -0.982823000 | 3.778870000  | -1.213571000 |
| C  | -0.694825000 | 2.411598000  | -1.318661000 |
| C  | -2.799618000 | 0.203650000  | -4.263856000 |
| C  | -4.099879000 | 1.230439000  | 2.388211000  |
| C  | 2.865447000  | -1.766720000 | -2.751856000 |
| C  | 3.690998000  | -2.587345000 | -1.974859000 |
| C  | -3.933467000 | -2.187988000 | -0.461677000 |
| C  | -3.751629000 | -3.212780000 | -1.392964000 |
| C  | -2.494435000 | -3.410302000 | -1.983832000 |
| C  | -1.419128000 | -2.583439000 | -1.646656000 |
| C  | -1.577777000 | -1.536699000 | -0.716718000 |
| C  | -2.859607000 | -1.348789000 | -0.119159000 |
| C  | -1.731699000 | 1.363946000  | 2.033831000  |
| C  | -2.872468000 | 1.840238000  | 2.670403000  |
| C  | -4.139333000 | 0.174767000  | 1.481035000  |
| C  | -2.958329000 | -0.260792000 | 0.861341000  |
| C  | 2.625714000  | -2.836825000 | 2.344464000  |
| C  | 2.230420000  | -2.771840000 | 3.682291000  |
| C  | 1.173405000  | -1.930281000 | 4.062058000  |
| C  | 0.508314000  | -1.157146000 | 3.106413000  |
| C  | 0.894385000  | -1.195044000 | 1.751207000  |
| C  | 1.972412000  | -2.054195000 | 1.377647000  |
| C  | 1.788381000  | -1.131321000 | -2.141634000 |
| C  | 2.336775000  | -2.048495000 | -0.044360000 |
| C  | 3.425743000  | -2.724011000 | -0.614259000 |
| H  | 3.100990000  | 1.212565000  | -0.982936000 |
| H  | 3.879762000  | 1.986056000  | 3.877262000  |
| H  | 1.795092000  | 2.811120000  | 2.811266000  |
| H  | 5.588021000  | 0.773830000  | 2.516973000  |
| H  | 5.192132000  | 0.396677000  | 0.081248000  |
| H  | -3.281227000 | -0.365866000 | -5.061826000 |
| H  | -4.618143000 | 1.124126000  | -3.521635000 |
| H  | -3.407040000 | 2.392623000  | -1.732114000 |
| H  | 1.503879000  | 4.596760000  | 0.947657000  |
| H  | -0.430015000 | 5.645110000  | -0.265186000 |



|   |              |              |              |
|---|--------------|--------------|--------------|
| H | -1.780760000 | 4.210834000  | -1.818943000 |
| H | -5.085634000 | -0.311272000 | 1.242430000  |
| H | -5.017419000 | 1.575522000  | 2.870934000  |
| H | -2.791049000 | 2.668716000  | 3.376032000  |
| H | -0.751272000 | 1.798532000  | 2.236745000  |
| H | 3.045271000  | -1.618476000 | -3.818121000 |
| H | 4.539775000  | -3.108911000 | -2.424012000 |
| H | 4.067206000  | -3.343829000 | 0.013026000  |
| H | 1.106005000  | -0.474673000 | -2.689369000 |
| H | -4.589515000 | -3.864215000 | -1.654201000 |
| H | -2.354165000 | -4.214485000 | -2.712073000 |
| H | -4.914380000 | -2.056353000 | 0.001562000  |
| H | -0.450189000 | -2.760284000 | -2.119396000 |
| H | 0.867029000  | -1.879679000 | 5.110993000  |
| H | -0.316304000 | -0.516622000 | 3.428563000  |
| H | 3.443550000  | -3.502861000 | 2.059120000  |
| H | 2.743801000  | -3.380431000 | 4.431095000  |

**(<sup>3</sup>MLCT/<sup>3</sup>MC<sub>ax 1</sub>)<sub>CI-NEB</sub> DFT B3LYP/DEF2-SVP CPCM.**

|    |              |              |              |
|----|--------------|--------------|--------------|
| Ir | 0.483004861  | -0.148434880 | -0.022379854 |
| N  | -0.552242613 | -0.887113394 | 2.030739427  |
| N  | 1.757283266  | 0.464995007  | -1.657438537 |
| C  | -2.432555261 | -2.069465048 | 2.914574039  |
| C  | -1.675494240 | -1.611284095 | 1.820887776  |
| C  | -0.134668470 | -0.628542303 | 3.274104170  |
| C  | -1.989177947 | -1.882078500 | 0.407268015  |
| C  | -1.107168524 | -1.351398152 | -0.563871505 |
| C  | -1.330653756 | -1.655275552 | -1.918281761 |
| C  | -2.442220726 | -2.410598516 | -2.308537506 |
| C  | -3.321350872 | -2.920947265 | -1.344538948 |
| C  | -3.089713316 | -2.663921659 | 0.006457612  |
| C  | 2.581119038  | -0.515800575 | -2.134229640 |
| C  | 3.423416510  | -0.246019919 | -3.225854050 |
| C  | 2.563466937  | 2.004738332  | -3.306631898 |
| C  | 1.749544439  | 1.687202959  | -2.227173290 |
| C  | 2.502808070  | -1.791375778 | -1.416476822 |
| C  | 1.548635547  | -1.861286972 | -0.365830063 |
| C  | 1.459085971  | -3.061232251 | 0.359810425  |
| C  | 2.275217679  | -4.156254747 | 0.054345915  |
| C  | 3.208339429  | -4.078134063 | -0.989636872 |
| C  | 3.322864116  | -2.897989678 | -1.720616070 |
| H  | -4.179402818 | -3.527593057 | -1.645320891 |
| H  | -3.771686939 | -3.080453485 | 0.751008146  |
| H  | -0.643691356 | -1.289811148 | -2.687245639 |
| H  | -2.614534145 | -2.611912696 | -3.369828663 |
| H  | 0.737062599  | -3.155192044 | 1.173936825  |
| H  | 4.059187283  | -2.838885945 | -2.525836098 |
| H  | 2.178117002  | -5.080443297 | 0.631844134  |
| H  | 3.844472942  | -4.934549748 | -1.227571069 |
| H  | 0.793880111  | -0.061976516 | 3.370845866  |
| C  | -2.007371339 | -1.790692245 | 4.210818466  |
| H  | -3.343627440 | -2.645347664 | 2.750510949  |
| H  | -2.588129545 | -2.143565217 | 5.066696261  |
| C  | -0.828015468 | -1.063605754 | 4.402147318  |
| H  | -0.447843838 | -0.836965355 | 5.399687000  |
| C  | 3.417762201  | 1.015315675  | -3.812840742 |
| H  | 1.078182090  | 2.427661300  | -1.787311340 |
| H  | 2.533439340  | 3.008310750  | -3.734271713 |

|   |              |              |              |
|---|--------------|--------------|--------------|
| H | 4.075513989  | 1.228698129  | -4.659063462 |
| H | 4.083922303  | -1.025808711 | -3.606050911 |
| C | 4.182598103  | 0.727565448  | 2.328943896  |
| C | 0.513618542  | 2.613187358  | 1.304189819  |
| C | 0.196600941  | 3.916678351  | 1.731789551  |
| C | -1.007931355 | 4.493397261  | 1.363639448  |
| C | -1.881262664 | 3.751459951  | 0.566505335  |
| C | -1.528396345 | 2.460672026  | 0.153463452  |
| N | -0.351201784 | 1.890244920  | 0.517978600  |
| H | 0.889492136  | 4.473719463  | 2.359044398  |
| H | -1.265576625 | 5.503789291  | 1.688779016  |
| H | -2.840547874 | 4.161736656  | 0.248268759  |
| C | 1.793942332  | 1.995057935  | 1.676246067  |
| C | 2.813654832  | 2.706949680  | 2.341405818  |
| C | 4.002277959  | 2.077680789  | 2.681617490  |
| C | 3.159942110  | 0.076001238  | 1.661010352  |
| N | 1.986540008  | 0.677539428  | 1.353610884  |
| H | 2.675879598  | 3.757569706  | 2.592964033  |
| H | 4.781816641  | 2.628827327  | 3.212234056  |
| H | 5.098046393  | 0.188500973  | 2.579196525  |
| H | 3.253272184  | -0.971950011 | 1.370725886  |
| C | -3.745245599 | 1.339949358  | -0.125575203 |
| C | -4.805147954 | 0.902231754  | -0.924888889 |
| C | -2.540916690 | 1.771602218  | -0.708997193 |
| H | -5.737650127 | 0.574662751  | -0.456809569 |
| C | -4.678575866 | 0.902907932  | -2.318462291 |
| C | -2.415307502 | 1.754505285  | -2.107305935 |
| H | -5.515729155 | 0.581883767  | -2.944449549 |
| H | -1.493827605 | 2.110155705  | -2.575098327 |
| C | -3.480580296 | 1.323835903  | -2.906018102 |
| H | -3.379234142 | 1.331245418  | -3.994585058 |
| H | -3.857327306 | 1.365426198  | 0.961731736  |

**(<sup>3</sup>MLCT/<sup>3</sup>MC<sub>eq 1</sub>)<sub>CI-NEB</sub>** DFT B3LYP/DEF2-SVP CPCM.

|    |              |              |              |
|----|--------------|--------------|--------------|
| Ir | 0.552401146  | -0.500123072 | 0.153739578  |
| N  | 2.035138751  | 0.870399176  | 1.249684994  |
| N  | -0.409493327 | 2.135335741  | 0.457802605  |
| N  | 1.573912133  | 0.002345916  | -1.614880836 |
| N  | -0.482953111 | -1.048567391 | 1.854241934  |
| C  | -3.460377261 | 1.946126090  | -2.957166814 |
| C  | -2.448979235 | 2.287735246  | -2.053148120 |
| C  | -4.657693332 | 1.387360308  | -2.496699248 |
| C  | -2.628041444 | 2.082989060  | -0.675403877 |
| C  | -4.840722897 | 1.168900906  | -1.126808010 |
| C  | -3.836138187 | 1.523261585  | -0.222738275 |
| C  | 3.247012515  | 0.354632493  | 1.540119894  |
| C  | 4.082864042  | 2.468045189  | 2.288676883  |
| C  | 2.833595136  | 3.005452781  | 1.997569729  |
| C  | 1.801751781  | 2.180989126  | 1.507795363  |
| C  | -1.657951876 | 2.631647442  | 0.323126430  |
| C  | -2.108659102 | 3.726675927  | 1.079964010  |
| C  | -1.256479167 | 4.320604846  | 2.007195115  |
| C  | 0.028664426  | 3.808318828  | 2.144862303  |
| C  | 0.426163947  | 2.721906217  | 1.344655929  |
| C  | 4.289422879  | 1.102905616  | 2.075521284  |
| C  | 3.068252759  | 0.515222192  | -3.902262092 |
| C  | -0.746102100 | -1.367568550 | 4.220822631  |
| C  | -1.929533191 | -2.104797839 | 4.005335045  |

|   |              |              |              |
|---|--------------|--------------|--------------|
| C | 3.476287255  | -3.173107225 | -1.438573260 |
| C | 3.565416327  | -4.235936096 | -0.537484264 |
| C | 2.782700009  | -4.239199854 | 0.628445124  |
| C | 1.907494439  | -3.181771871 | 0.892912428  |
| C | 1.815037544  | -2.089416100 | 0.008742461  |
| C | 2.614255668  | -2.095325887 | -1.172994090 |
| C | 1.409857910  | 1.154868739  | -2.289401289 |
| C | 2.134807971  | 1.449720988  | -3.439910411 |
| C | 3.250151936  | -0.669895875 | -3.193760072 |
| C | 2.494168435  | -0.914506503 | -2.037354596 |
| C | -3.057281266 | -2.645708474 | -0.278933100 |
| C | -3.299357708 | -2.704541010 | -1.647216229 |
| C | -2.448128294 | -2.031963504 | -2.559652958 |
| C | -1.360344472 | -1.309797200 | -2.094268948 |
| C | -1.079095491 | -1.220661089 | -0.701889101 |
| C | -1.972461451 | -1.896441599 | 0.218832784  |
| C | -0.059882005 | -0.865100903 | 3.128386282  |
| C | -1.640171549 | -1.769628175 | 1.621196326  |
| C | -2.367098676 | -2.301053502 | 2.703312956  |
| H | -3.992135535 | 1.374511148  | 0.848771930  |
| H | -3.319639538 | 2.134581214  | -4.024937526 |
| H | -1.532249183 | 2.757901981  | -2.416854739 |
| H | -5.451651664 | 1.131187771  | -3.202416629 |
| H | -5.775055243 | 0.737067371  | -0.757482032 |
| H | 3.377546660  | -0.709245796 | 1.340384999  |
| H | 5.239478982  | 0.618097374  | 2.307063777  |
| H | 4.879871875  | 3.104105457  | 2.680871156  |
| H | 2.653840212  | 4.069429607  | 2.148696962  |
| H | -3.116175439 | 4.111280815  | 0.914465001  |
| H | -1.588076014 | 5.167945391  | 2.611859247  |
| H | 0.707539703  | 4.232966280  | 2.883542182  |
| H | 3.984527839  | -1.403695092 | -3.526976676 |
| H | 3.655765778  | 0.712317569  | -4.802268332 |
| H | 1.963811102  | 2.393931509  | -3.960005272 |
| H | 0.670674358  | 1.844749547  | -1.880256883 |
| H | -0.358737064 | -1.190347853 | 5.225842014  |
| H | -2.490273583 | -2.517296156 | 4.846927471  |
| H | -3.278594147 | -2.867781358 | 2.507405840  |
| H | 0.866979983  | -0.304372615 | 3.253468937  |
| H | 4.247218236  | -5.065232994 | -0.743335659 |
| H | 2.861222786  | -5.071572259 | 1.333680531  |
| H | 4.085999825  | -3.188875087 | -2.345114134 |
| H | 1.303773799  | -3.206375100 | 1.803998540  |
| H | -2.656011572 | -2.082495462 | -3.631846726 |
| H | -0.712104404 | -0.802469323 | -2.812056576 |
| H | -3.716156737 | -3.185879153 | 0.405400221  |
| H | -4.153802881 | -3.274767475 | -2.021224122 |

**(<sup>3</sup>MLCT/<sup>3</sup>MC<sub>ax 2</sub>)<sub>CI-NEB</sub> DFT B3LYP/DEF2-SVP CPCM.**

|    |              |              |              |
|----|--------------|--------------|--------------|
| Ir | 0.408554370  | -0.400141292 | 0.219372241  |
| N  | -0.963592279 | -0.672349713 | 1.806070177  |
| N  | 1.513751154  | 0.379041456  | -1.632681810 |
| C  | -2.915463533 | -1.879882985 | 2.518998452  |
| C  | -2.016067739 | -1.506261843 | 1.514800184  |
| C  | -0.787187423 | -0.235231992 | 3.074881702  |
| C  | -2.069608214 | -1.931719276 | 0.110905629  |
| C  | -1.012806064 | -1.459717570 | -0.729262417 |
| C  | -1.013146903 | -1.865049933 | -2.081635704 |

|   |              |              |              |
|---|--------------|--------------|--------------|
| C | -2.008247427 | -2.701942418 | -2.587635646 |
| C | -3.039561557 | -3.155796417 | -1.749182693 |
| C | -3.070500846 | -2.770567292 | -0.407173120 |
| C | 2.468899739  | -0.456611554 | -2.112414249 |
| C | 3.258371921  | -0.075516156 | -3.211257027 |
| C | 2.086450836  | 2.022723315  | -3.284497142 |
| C | 1.338373697  | 1.583320724  | -2.194964975 |
| C | 2.592197183  | -1.733354002 | -1.392154091 |
| C | 1.773558074  | -1.897783714 | -0.249839443 |
| C | 1.866517633  | -3.094641952 | 0.479866472  |
| C | 2.734524041  | -4.116065267 | 0.072296602  |
| C | 3.543348911  | -3.944336190 | -1.059198630 |
| C | 3.476476719  | -2.755059460 | -1.785175223 |
| H | -3.819896334 | -3.812341249 | -2.143111226 |
| H | -3.880239926 | -3.131095402 | 0.231824455  |
| H | -0.214564503 | -1.529389379 | -2.747433239 |
| H | -1.981055988 | -3.013050289 | -3.635750820 |
| H | 1.247893706  | -3.246076088 | 1.369908370  |
| H | 4.112608342  | -2.629513403 | -2.664525858 |
| H | 2.780343406  | -5.049287066 | 0.641053950  |
| H | 4.226460239  | -4.736923190 | -1.374847111 |
| H | 0.065148060  | 0.423520073  | 3.249269125  |
| C | -2.744242869 | -1.411483591 | 3.823308884  |
| H | -3.754147329 | -2.533513627 | 2.276045612  |
| H | -3.451399300 | -1.691729197 | 4.607327533  |
| C | -1.652796491 | -0.577405290 | 4.105511267  |
| H | -1.480354219 | -0.180262331 | 5.107763510  |
| C | 3.063745483  | 1.168858662  | -3.804487079 |
| H | 0.575324193  | 2.221341486  | -1.749508374 |
| H | 1.901323716  | 3.011972522  | -3.707730990 |
| H | 3.672488592  | 1.472438693  | -4.659799309 |
| H | 4.025317109  | -0.749998392 | -3.592592139 |
| C | 4.250832235  | 0.506947412  | 2.417858313  |
| C | 0.786972813  | 2.635635752  | 1.227457196  |
| C | 0.548521583  | 3.936148044  | 1.706580326  |
| C | -0.677216898 | 4.539828935  | 1.464062220  |
| C | -1.654843188 | 3.813236557  | 0.781755755  |
| C | -1.375534043 | 2.515710210  | 0.327853038  |
| N | -0.155377722 | 1.953365771  | 0.521106312  |
| H | 1.307983603  | 4.461429756  | 2.284496442  |
| H | -0.877405084 | 5.555379104  | 1.812721610  |
| H | -2.631532069 | 4.250206789  | 0.568967553  |
| C | 2.049039983  | 1.939215912  | 1.548326252  |
| C | 3.169273934  | 2.619898576  | 2.065368173  |
| C | 4.278485790  | 1.903351202  | 2.498294603  |
| C | 3.133346061  | -0.100488971 | 1.854519167  |
| N | 2.066160419  | 0.587366934  | 1.408161931  |
| H | 3.172664249  | 3.707720659  | 2.124710830  |
| H | 5.150104846  | 2.426085566  | 2.899186139  |
| H | 5.082711482  | -0.107228982 | 2.768005382  |
| H | 3.089678057  | -1.184217853 | 1.745426835  |
| C | -3.714847365 | 1.655901379  | 0.282287837  |
| C | -4.815974979 | 1.096059984  | -0.370158747 |
| C | -2.480730719 | 1.799436753  | -0.380971186 |
| H | -5.762838437 | 0.983408994  | 0.164698942  |
| C | -4.707899784 | 0.690767982  | -1.705161889 |
| C | -2.380712151 | 1.378162227  | -1.716491217 |
| H | -5.571627478 | 0.263181476  | -2.221578349 |

|   |              |             |              |
|---|--------------|-------------|--------------|
| H | -1.441324725 | 1.491868909 | -2.258029954 |
| C | -3.488937803 | 0.836407887 | -2.374896997 |
| H | -3.396160018 | 0.524147765 | -3.418172065 |
| H | -3.809610771 | 1.981945862 | 1.321269694  |

**(<sup>3</sup>MLCT/<sup>3</sup>MC<sub>eq 2</sub>)<sub>CI-NEB</sub>** DFT B3LYP/DEF2-SVP CPCM.

|    |              |              |              |
|----|--------------|--------------|--------------|
| Ir | -0.202007371 | -0.412348446 | -0.044122591 |
| N  | -1.112501254 | 0.645274185  | -2.453339173 |
| N  | 0.313070808  | 1.990946065  | -0.546421234 |
| N  | -1.902993171 | 0.285334031  | 0.960530543  |
| N  | 1.462054192  | -1.198483218 | -0.994631668 |
| H  | -1.417490478 | -1.085644145 | -3.546997963 |
| C  | 3.701429020  | 1.571770099  | 2.854833505  |
| C  | 2.548784459  | 2.100983647  | 2.268739716  |
| C  | 4.668525250  | 0.944705380  | 2.060435861  |
| C  | 2.335563106  | 1.987513307  | 0.882958491  |
| C  | 4.471418700  | 0.842447115  | 0.678707986  |
| C  | 3.310657806  | 1.355496770  | 0.092384378  |
| C  | -1.777796973 | -0.068696376 | -3.366478785 |
| C  | -3.321523900 | 1.717377590  | -3.761664553 |
| C  | -2.620532319 | 2.469466892  | -2.817453609 |
| C  | -1.495597469 | 1.903697919  | -2.190501812 |
| C  | 1.174507114  | 2.671334940  | 0.241767186  |
| C  | 1.045574781  | 4.057732051  | 0.439818189  |
| C  | 0.042717786  | 4.753638252  | -0.225700595 |
| C  | -0.793422743 | 4.055206359  | -1.093327720 |
| C  | -0.638126364 | 2.668791674  | -1.234871421 |
| C  | -2.884538548 | 0.424551683  | -4.059999742 |
| C  | -4.262746617 | 1.046962205  | 2.234280489  |
| C  | 2.839449589  | -1.651398876 | -2.900605335 |
| C  | 3.677289700  | -2.450069438 | -2.110761866 |
| C  | -3.823817454 | -2.669789836 | -0.175374688 |
| C  | -3.558094808 | -3.792012902 | -0.960350634 |
| C  | -2.303807931 | -3.937627335 | -1.578768385 |
| C  | -1.323678415 | -2.955340135 | -1.424067474 |
| C  | -1.571219261 | -1.802473513 | -0.648565622 |
| C  | -2.843519425 | -1.674150905 | -0.011463217 |
| C  | -1.948663617 | 1.404981023  | 1.711710223  |
| C  | -3.104373826 | 1.825098825  | 2.358018273  |
| C  | -4.218241966 | -0.112127869 | 1.466317411  |
| C  | -3.026631435 | -0.484687826 | 0.822747353  |
| C  | 2.550944565  | -2.705083873 | 2.202824494  |
| C  | 2.134699453  | -2.635707171 | 3.533571171  |
| C  | 1.064263007  | -1.798367473 | 3.895347988  |
| C  | 0.411343217  | -1.033958775 | 2.928624397  |
| C  | 0.818799004  | -1.068088419 | 1.574413727  |
| C  | 1.912282629  | -1.928306891 | 1.221703161  |
| C  | 1.740102202  | -1.046191244 | -2.304304893 |
| C  | 2.291879384  | -1.934137060 | -0.194082441 |
| C  | 3.402104573  | -2.586988137 | -0.752531469 |
| H  | 3.171464310  | 1.291038046  | -0.988822489 |
| H  | 3.847279805  | 1.653888691  | 3.935446012  |
| H  | 1.799929739  | 2.596183569  | 2.892323478  |
| H  | 5.577061708  | 0.542707235  | 2.516862264  |
| H  | 5.229611201  | 0.366322672  | 0.051178316  |
| H  | -3.389991466 | -0.196599234 | -4.802046347 |
| H  | -4.199617295 | 2.138976359  | -4.257148209 |
| H  | -2.955732712 | 3.477891246  | -2.577881574 |

|   |              |              |              |
|---|--------------|--------------|--------------|
| H | 1.756733581  | 4.574153887  | 1.086728035  |
| H | -0.069430833 | 5.832670608  | -0.095573722 |
| H | -1.549798655 | 4.590641227  | -1.665370576 |
| H | -5.107117284 | -0.733894864 | 1.356733832  |
| H | -5.188142502 | 1.342287453  | 2.734214151  |
| H | -3.087166096 | 2.741163485  | 2.950710292  |
| H | -1.019595028 | 1.968903412  | 1.801879214  |
| H | 3.025824737  | -1.501432813 | -3.965518117 |
| H | 4.541997910  | -2.952674545 | -2.550442525 |
| H | 4.053339707  | -3.187072084 | -0.116488590 |
| H | 1.044659884  | -0.420738637 | -2.865398001 |
| H | -4.323703617 | -4.561836186 | -1.084921202 |
| H | -2.097054497 | -4.822660363 | -2.187022557 |
| H | -4.795593633 | -2.579880061 | 0.316029563  |
| H | -0.357585131 | -3.088654312 | -1.918257695 |
| H | 0.740938827  | -1.749009228 | 4.938762626  |
| H | -0.423658501 | -0.398462359 | 3.233505993  |
| H | 3.371761356  | -3.374732024 | 1.935167347  |
| H | 2.637449481  | -3.240811328 | 4.292002830  |

(<sup>3</sup>MLCT/<sup>3</sup>MC<sub>ax 1</sub>)<sub>ts</sub> DFT B3LYP/DEF2-SVP CPCM.

|    |              |              |              |
|----|--------------|--------------|--------------|
| Ir | 0.483824000  | -0.169041000 | 0.024361000  |
| N  | -0.519875000 | -0.845315000 | 2.091034000  |
| N  | 1.714858000  | 0.444801000  | -1.613791000 |
| C  | -2.468130000 | -1.866418000 | 3.033259000  |
| C  | -1.684494000 | -1.514345000 | 1.919557000  |
| C  | -0.097833000 | -0.530185000 | 3.321664000  |
| C  | -2.013099000 | -1.842506000 | 0.522348000  |
| C  | -1.121615000 | -1.377908000 | -0.473933000 |
| C  | -1.342037000 | -1.761156000 | -1.808380000 |
| C  | -2.463142000 | -2.521331000 | -2.159471000 |
| C  | -3.360589000 | -2.951198000 | -1.173128000 |
| C  | -3.131117000 | -2.619170000 | 0.161903000  |
| C  | 2.415421000  | -0.569983000 | -2.210600000 |
| C  | 3.095106000  | -0.330861000 | -3.416421000 |
| C  | 2.380712000  | 1.971142000  | -3.339458000 |
| C  | 1.714163000  | 1.682005000  | -2.157571000 |
| C  | 2.387968000  | -1.837794000 | -1.479119000 |
| C  | 1.533550000  | -1.879766000 | -0.344039000 |
| C  | 1.513202000  | -3.054616000 | 0.424783000  |
| C  | 2.301258000  | -4.157792000 | 0.077051000  |
| C  | 3.128316000  | -4.112713000 | -1.055296000 |
| C  | 3.173092000  | -2.955292000 | -1.829453000 |
| H  | -4.228284000 | -3.558428000 | -1.443312000 |
| H  | -3.824297000 | -2.977882000 | 0.926061000  |
| H  | -0.642028000 | -1.459372000 | -2.592770000 |
| H  | -2.627454000 | -2.790843000 | -3.206809000 |
| H  | 0.868820000  | -3.119631000 | 1.304872000  |
| H  | 3.831453000  | -2.917395000 | -2.700831000 |
| H  | 2.265116000  | -5.063362000 | 0.689880000  |
| H  | 3.739926000  | -4.976761000 | -1.327218000 |
| H  | 0.862876000  | -0.017029000 | 3.392030000  |
| C  | -2.038966000 | -1.524438000 | 4.313338000  |
| H  | -3.404660000 | -2.407452000 | 2.895920000  |
| H  | -2.643473000 | -1.790402000 | 5.184226000  |
| C  | -0.825793000 | -0.846132000 | 4.467646000  |
| H  | -0.443740000 | -0.568514000 | 5.451957000  |
| C  | 3.076199000  | 0.938383000  | -3.986326000 |

|   |              |              |              |
|---|--------------|--------------|--------------|
| H | 1.175383000  | 2.455269000  | -1.606766000 |
| H | 2.360316000  | 2.986711000  | -3.738882000 |
| H | 3.604278000  | 1.127128000  | -4.924153000 |
| H | 3.638292000  | -1.143823000 | -3.899524000 |
| C | 4.321559000  | 0.886811000  | 2.045392000  |
| C | 0.425775000  | 2.493754000  | 1.518947000  |
| C | -0.028342000 | 3.619311000  | 2.229102000  |
| C | -1.313800000 | 4.093644000  | 2.010042000  |
| C | -2.105630000 | 3.463522000  | 1.047275000  |
| C | -1.606696000 | 2.356115000  | 0.347041000  |
| N | -0.377975000 | 1.845828000  | 0.618549000  |
| H | 0.616114000  | 4.096100000  | 2.967010000  |
| H | -1.692543000 | 4.952892000  | 2.568407000  |
| H | -3.102338000 | 3.837021000  | 0.809667000  |
| C | 1.788440000  | 1.975310000  | 1.717885000  |
| C | 2.829119000  | 2.767810000  | 2.240049000  |
| C | 4.097880000  | 2.227493000  | 2.410092000  |
| C | 3.269956000  | 0.158667000  | 1.514728000  |
| N | 2.031036000  | 0.679004000  | 1.354268000  |
| H | 2.644496000  | 3.812479000  | 2.491403000  |
| H | 4.908116000  | 2.840011000  | 2.811869000  |
| H | 5.297578000  | 0.414996000  | 2.173552000  |
| H | 3.395483000  | -0.882757000 | 1.212234000  |
| C | -3.777139000 | 1.416380000  | -0.499086000 |
| C | -4.612987000 | 1.017026000  | -1.545798000 |
| C | -2.447798000 | 1.799627000  | -0.752661000 |
| H | -5.640831000 | 0.712172000  | -1.331495000 |
| C | -4.138908000 | 1.013172000  | -2.862631000 |
| C | -1.980475000 | 1.789272000  | -2.078213000 |
| H | -4.796210000 | 0.710045000  | -3.682019000 |
| H | -0.964264000 | 2.117393000  | -2.299172000 |
| C | -2.821342000 | 1.402364000  | -3.125256000 |
| H | -2.445204000 | 1.412040000  | -4.151789000 |
| H | -4.156576000 | 1.425908000  | 0.525966000  |

(<sup>3</sup>MLCT/<sup>3</sup>MC<sub>eq 1</sub>)<sub>ts</sub> DFT B3LYP/DEF2-SVP CPCM.

|    |              |              |              |
|----|--------------|--------------|--------------|
| Ir | 0.610011000  | -0.416222000 | 0.132382000  |
| N  | 2.125251000  | 1.014721000  | 1.061435000  |
| N  | -0.468870000 | 2.036646000  | 0.602148000  |
| N  | 1.589995000  | -0.035367000 | -1.685419000 |
| N  | -0.401340000 | -0.858912000 | 1.875372000  |
| C  | -2.843089000 | 2.153859000  | -3.061677000 |
| C  | -2.073837000 | 2.348568000  | -1.911626000 |
| C  | -4.135044000 | 1.625131000  | -2.961799000 |
| C  | -2.584318000 | 2.025083000  | -0.641626000 |
| C  | -4.654405000 | 1.300038000  | -1.703071000 |
| C  | -3.889193000 | 1.505164000  | -0.551881000 |
| C  | 3.436971000  | 0.715982000  | 1.024463000  |
| C  | 4.026618000  | 2.797771000  | 2.056320000  |
| C  | 2.669269000  | 3.109705000  | 2.096903000  |
| C  | 1.730272000  | 2.193995000  | 1.596095000  |
| C  | -1.792724000 | 2.323721000  | 0.582960000  |
| C  | -2.415115000 | 2.979384000  | 1.659739000  |
| C  | -1.653084000 | 3.398198000  | 2.749808000  |
| C  | -0.277284000 | 3.167721000  | 2.730634000  |
| C  | 0.274083000  | 2.481087000  | 1.640673000  |
| C  | 4.419997000  | 1.572063000  | 1.514476000  |
| C  | 2.965678000  | 0.268418000  | -4.081321000 |

|   |              |              |              |
|---|--------------|--------------|--------------|
| C | -0.660928000 | -0.994570000 | 4.260764000  |
| C | -1.885292000 | -1.680574000 | 4.105058000  |
| C | 3.223641000  | -3.355135000 | -1.486124000 |
| C | 3.302859000  | -4.367242000 | -0.527579000 |
| C | 2.642240000  | -4.228162000 | 0.704488000  |
| C | 1.886251000  | -3.084955000 | 0.973248000  |
| C | 1.797256000  | -2.047036000 | 0.024803000  |
| C | 2.489202000  | -2.187692000 | -1.216487000 |
| C | 1.497634000  | 1.112401000  | -2.380840000 |
| C | 2.168208000  | 1.306608000  | -3.583685000 |
| C | 3.084906000  | -0.908495000 | -3.347101000 |
| C | 2.397242000  | -1.044666000 | -2.131010000 |
| C | -3.062645000 | -2.493214000 | -0.125104000 |
| C | -3.311737000 | -2.646035000 | -1.484074000 |
| C | -2.441174000 | -2.075156000 | -2.447351000 |
| C | -1.326433000 | -1.359534000 | -2.038197000 |
| C | -1.037364000 | -1.176755000 | -0.658164000 |
| C | -1.947409000 | -1.748982000 | 0.314089000  |
| C | 0.044125000  | -0.613465000 | 3.132249000  |
| C | -1.596912000 | -1.537885000 | 1.700543000  |
| C | -2.339434000 | -1.952839000 | 2.822201000  |
| H | -4.302663000 | 1.243186000  | 0.425352000  |
| H | -2.434614000 | 2.423906000  | -4.039415000 |
| H | -1.079314000 | 2.791092000  | -1.991272000 |
| H | -4.737351000 | 1.470769000  | -3.861171000 |
| H | -5.661765000 | 0.883969000  | -1.616381000 |
| H | 3.704988000  | -0.249791000 | 0.592532000  |
| H | 5.469453000  | 1.276125000  | 1.463846000  |
| H | 4.767267000  | 3.505984000  | 2.435760000  |
| H | 2.332157000  | 4.067992000  | 2.493885000  |
| H | -3.482869000 | 3.200049000  | 1.612890000  |
| H | -2.120172000 | 3.912719000  | 3.592780000  |
| H | 0.355113000  | 3.493493000  | 3.557843000  |
| H | 3.720164000  | -1.719476000 | -3.704713000 |
| H | 3.498801000  | 0.381204000  | -5.028418000 |
| H | 2.059056000  | 2.252199000  | -4.117447000 |
| H | 0.858865000  | 1.882444000  | -1.947910000 |
| H | -0.256831000 | -0.765126000 | 5.248411000  |
| H | -2.462141000 | -1.997319000 | 4.976782000  |
| H | -3.278687000 | -2.487427000 | 2.671658000  |
| H | 1.006063000  | -0.105727000 | 3.215300000  |
| H | 3.880817000  | -5.270322000 | -0.739786000 |
| H | 2.716169000  | -5.020760000 | 1.454484000  |
| H | 3.736002000  | -3.482605000 | -2.442693000 |
| H | 1.364091000  | -3.002957000 | 1.929853000  |
| H | -2.653103000 | -2.201067000 | -3.512397000 |
| H | -0.662610000 | -0.931970000 | -2.792601000 |
| H | -3.735442000 | -2.958984000 | 0.598988000  |
| H | -4.185523000 | -3.214970000 | -1.812872000 |

(<sup>3</sup>MLCT/<sup>3</sup>MC<sub>ax 2</sub>)<sub>ts</sub> DFT B3LYP/DEF2-SVP CPCM.

|    |              |              |              |
|----|--------------|--------------|--------------|
| Ir | 0.426881000  | -0.386099000 | 0.257372000  |
| N  | -0.923639000 | -0.616465000 | 1.881180000  |
| N  | 1.545639000  | 0.306616000  | -1.659393000 |
| C  | -2.731577000 | -1.980594000 | 2.687796000  |
| C  | -1.940506000 | -1.507862000 | 1.634478000  |
| C  | -0.684430000 | -0.210657000 | 3.150260000  |
| C  | -2.064353000 | -1.900206000 | 0.224665000  |



|   |              |              |              |
|---|--------------|--------------|--------------|
| C | -1.050582000 | -1.409638000 | -0.653713000 |
| C | -1.125429000 | -1.769806000 | -2.015223000 |
| C | -2.149451000 | -2.589787000 | -2.492478000 |
| C | -3.134081000 | -3.071242000 | -1.614768000 |
| C | -3.091810000 | -2.727023000 | -0.262742000 |
| C | 2.409471000  | -0.615124000 | -2.154043000 |
| C | 3.174776000  | -0.327633000 | -3.297300000 |
| C | 2.188181000  | 1.865690000  | -3.364521000 |
| C | 1.455355000  | 1.513376000  | -2.232451000 |
| C | 2.490997000  | -1.869148000 | -1.384663000 |
| C | 1.741077000  | -1.922247000 | -0.185937000 |
| C | 1.838292000  | -3.064802000 | 0.626279000  |
| C | 2.634007000  | -4.150891000 | 0.238957000  |
| C | 3.360715000  | -4.098811000 | -0.957850000 |
| C | 3.294813000  | -2.960044000 | -1.763237000 |
| H | -3.935743000 | -3.714568000 | -1.986880000 |
| H | -3.866949000 | -3.104731000 | 0.408448000  |
| H | -0.364543000 | -1.412405000 | -2.712937000 |
| H | -2.182195000 | -2.861924000 | -3.551325000 |
| H | 1.279930000  | -3.122332000 | 1.565952000  |
| H | 3.872190000  | -2.929340000 | -2.690350000 |
| H | 2.688618000  | -5.038998000 | 0.875298000  |
| H | 3.984717000  | -4.943664000 | -1.260417000 |
| H | 0.135058000  | 0.496670000  | 3.289989000  |
| C | -2.492074000 | -1.548688000 | 3.993571000  |
| H | -3.531089000 | -2.694098000 | 2.484020000  |
| H | -3.109038000 | -1.914488000 | 4.817537000  |
| C | -1.443860000 | -0.647107000 | 4.227497000  |
| H | -1.220861000 | -0.276186000 | 5.229771000  |
| C | 3.057417000  | 0.916850000  | -3.911478000 |
| H | 0.777246000  | 2.224277000  | -1.757561000 |
| H | 2.076062000  | 2.860656000  | -3.799566000 |
| H | 3.648961000  | 1.148931000  | -4.800705000 |
| H | 3.867681000  | -1.071238000 | -3.691915000 |
| C | 4.389924000  | 0.782381000  | 2.109797000  |
| C | 0.648498000  | 2.629992000  | 1.380287000  |
| C | 0.286294000  | 3.769047000  | 2.116557000  |
| C | -1.002939000 | 4.274694000  | 1.993513000  |
| C | -1.891922000 | 3.627247000  | 1.137258000  |
| C | -1.477610000 | 2.494683000  | 0.417172000  |
| N | -0.218596000 | 2.003628000  | 0.545174000  |
| H | 0.995892000  | 4.231164000  | 2.802535000  |
| H | -1.313010000 | 5.155956000  | 2.559757000  |
| H | -2.904967000 | 4.006241000  | 0.995582000  |
| C | 1.989725000  | 2.028901000  | 1.563158000  |
| C | 3.084501000  | 2.791661000  | 2.006095000  |
| C | 4.297853000  | 2.166120000  | 2.276741000  |
| C | 3.277111000  | 0.094284000  | 1.633429000  |
| N | 2.108301000  | 0.695547000  | 1.345717000  |
| H | 2.986630000  | 3.870858000  | 2.123997000  |
| H | 5.156840000  | 2.750428000  | 2.615252000  |
| H | 5.309736000  | 0.236695000  | 2.328080000  |
| H | 3.320595000  | -0.982339000 | 1.467512000  |
| C | -3.747843000 | 1.544359000  | -0.027573000 |
| C | -4.733513000 | 1.058080000  | -0.890279000 |
| C | -2.467705000 | 1.874541000  | -0.512100000 |
| H | -5.718169000 | 0.795273000  | -0.494392000 |
| C | -4.462363000 | 0.912506000  | -2.255405000 |

|   |              |             |              |
|---|--------------|-------------|--------------|
| C | -2.205750000 | 1.719860000 | -1.883239000 |
| H | -5.235778000 | 0.541119000 | -2.933059000 |
| H | -1.231936000 | 1.996294000 | -2.286766000 |
| C | -3.197258000 | 1.248608000 | -2.748275000 |
| H | -2.979014000 | 1.146548000 | -3.814607000 |
| H | -3.969407000 | 1.660399000 | 1.036467000  |

**(<sup>3</sup>MC<sub>ax 1</sub>/S<sub>0</sub>)<sub>stc-mecp</sub>** DFT B3LYP/DEF2-SVP CPCM.

|    |              |              |              |
|----|--------------|--------------|--------------|
| Ir | 0.367502000  | -0.129233000 | 0.138986000  |
| N  | -0.702714000 | 2.062702000  | 1.355535000  |
| N  | 2.001509000  | -1.244032000 | -1.029694000 |
| C  | -2.792679000 | 2.624133000  | 2.373246000  |
| C  | -1.870958000 | 1.666629000  | 1.901158000  |
| C  | -0.396281000 | 3.361700000  | 1.297496000  |
| C  | -2.085663000 | 0.205542000  | 1.995096000  |
| C  | -1.182836000 | -0.680687000 | 1.353067000  |
| C  | -1.352163000 | -2.065230000 | 1.551010000  |
| C  | -2.404895000 | -2.573292000 | 2.317446000  |
| C  | -3.312791000 | -1.696659000 | 2.923163000  |
| C  | -3.145650000 | -0.323144000 | 2.763896000  |
| C  | 2.909838000  | -1.823120000 | -0.202315000 |
| C  | 3.909938000  | -2.652844000 | -0.742398000 |
| C  | 3.031087000  | -2.238330000 | -2.950635000 |
| C  | 2.061912000  | -1.435562000 | -2.356604000 |
| C  | 2.764817000  | -1.496408000 | 1.229962000  |
| C  | 1.650930000  | -0.693681000 | 1.614726000  |
| C  | 1.546185000  | -0.336894000 | 2.972516000  |
| C  | 2.488809000  | -0.757270000 | 3.917007000  |
| C  | 3.570065000  | -1.558999000 | 3.528001000  |
| C  | 3.705733000  | -1.922840000 | 2.189190000  |
| H  | -4.135766000 | -2.080878000 | 3.531298000  |
| H  | -3.841667000 | 0.350092000  | 3.268320000  |
| H  | -0.651579000 | -2.771503000 | 1.095936000  |
| H  | -2.508065000 | -3.654382000 | 2.447621000  |
| H  | 0.707748000  | 0.281417000  | 3.301776000  |
| H  | 4.559211000  | -2.535663000 | 1.890563000  |
| H  | 2.377181000  | -0.461071000 | 4.964454000  |
| H  | 4.306582000  | -1.892852000 | 4.263408000  |
| H  | 0.575192000  | 3.620565000  | 0.866018000  |
| C  | -2.477790000 | 3.978756000  | 2.301187000  |
| H  | -3.750438000 | 2.312851000  | 2.790365000  |
| H  | -3.187391000 | 4.726765000  | 2.664495000  |
| C  | -1.246501000 | 4.365386000  | 1.762991000  |
| H  | -0.949948000 | 5.414338000  | 1.698702000  |
| C  | 3.967832000  | -2.862221000 | -2.117826000 |
| H  | 1.309739000  | -0.918264000 | -2.958315000 |
| H  | 3.048285000  | -2.368441000 | -4.034239000 |
| H  | 4.742413000  | -3.507492000 | -2.540183000 |
| H  | 4.637339000  | -3.132241000 | -0.087047000 |
| C  | 3.423040000  | 3.070698000  | -0.782998000 |
| C  | -0.457671000 | 1.874202000  | -2.062149000 |
| C  | -1.258052000 | 2.676763000  | -2.882745000 |
| C  | -2.513015000 | 2.214567000  | -3.272355000 |
| C  | -2.911097000 | 0.946224000  | -2.869414000 |
| C  | -2.067639000 | 0.173085000  | -2.050274000 |
| N  | -0.881848000 | 0.661020000  | -1.613537000 |
| H  | -0.916760000 | 3.659802000  | -3.203598000 |
| H  | -3.159504000 | 2.829719000  | -3.902317000 |

|   |              |              |              |
|---|--------------|--------------|--------------|
| H | -3.860978000 | 0.527121000  | -3.203152000 |
| C | 0.900102000  | 2.326532000  | -1.653202000 |
| C | 1.559675000  | 3.399780000  | -2.273703000 |
| C | 2.828716000  | 3.773970000  | -1.833151000 |
| C | 2.721049000  | 2.005978000  | -0.221466000 |
| N | 1.502304000  | 1.650084000  | -0.652123000 |
| H | 1.098062000  | 3.934020000  | -3.103238000 |
| H | 3.348475000  | 4.607761000  | -2.311051000 |
| H | 4.412611000  | 3.332095000  | -0.403704000 |
| H | 3.139236000  | 1.416264000  | 0.597155000  |
| C | -3.799414000 | -1.495184000 | -1.327129000 |
| C | -4.226676000 | -2.812017000 | -1.139726000 |
| C | -2.481282000 | -1.222746000 | -1.737366000 |
| H | -5.250402000 | -3.006675000 | -0.809254000 |
| C | -3.350075000 | -3.877179000 | -1.376211000 |
| C | -1.607929000 | -2.299858000 | -1.970924000 |
| H | -3.688626000 | -4.907654000 | -1.239061000 |
| H | -0.595616000 | -2.108792000 | -2.327605000 |
| C | -2.040733000 | -3.616804000 | -1.794411000 |
| H | -1.353511000 | -4.443009000 | -1.995080000 |
| H | -4.491799000 | -0.670714000 | -1.139467000 |

(<sup>3</sup>MC<sub>eq 1</sub>/S<sub>0</sub>)<sub>stc-mecp</sub> DFT B3LYP/DEF2-SVP CPCM.

|    |              |              |              |
|----|--------------|--------------|--------------|
| Ir | -1.054245000 | 0.106003000  | 0.173587000  |
| N  | 2.256279000  | -0.561002000 | -1.307853000 |
| N  | -0.636382000 | 2.128487000  | -0.100730000 |
| N  | -1.473420000 | -1.913947000 | 0.487943000  |
| C  | -0.962210000 | -3.881591000 | 1.760643000  |
| C  | -0.761110000 | -2.520896000 | 1.484004000  |
| C  | -2.353797000 | -2.627178000 | -0.241872000 |
| C  | 0.184597000  | -1.636242000 | 2.175319000  |
| C  | 0.308152000  | -0.315662000 | 1.647095000  |
| C  | 1.178274000  | 0.582959000  | 2.294997000  |
| C  | 1.916649000  | 0.185610000  | 3.413973000  |
| C  | 1.796869000  | -1.119148000 | 3.915742000  |
| C  | 0.931352000  | -2.026053000 | 3.300655000  |
| C  | -1.674028000 | 2.992300000  | 0.104669000  |
| C  | -1.478826000 | 4.370893000  | -0.063180000 |
| C  | 0.808165000  | 3.945873000  | -0.689777000 |
| C  | 0.564548000  | 2.589260000  | -0.500393000 |
| C  | -2.940670000 | 2.341690000  | 0.472976000  |
| C  | -2.936930000 | 0.915295000  | 0.467703000  |
| C  | -4.122014000 | 0.243565000  | 0.821445000  |
| C  | -5.281373000 | 0.956290000  | 1.147122000  |
| C  | -5.274523000 | 2.358391000  | 1.139494000  |
| C  | -4.107313000 | 3.050118000  | 0.806945000  |
| H  | 2.373248000  | -1.426213000 | 4.792208000  |
| H  | 0.835547000  | -3.034704000 | 3.710269000  |
| H  | 1.290118000  | 1.605969000  | 1.928201000  |
| H  | 2.592039000  | 0.896527000  | 3.898775000  |
| H  | -4.152843000 | -0.849016000 | 0.843687000  |
| H  | -4.112477000 | 4.142829000  | 0.815935000  |
| H  | -6.195899000 | 0.416897000  | 1.410640000  |
| H  | -6.179542000 | 2.913584000  | 1.399248000  |
| H  | -2.890679000 | -2.085252000 | -1.023110000 |
| C  | -1.875168000 | -4.616734000 | 1.009068000  |
| H  | -0.394157000 | -4.359781000 | 2.559076000  |
| H  | -2.032321000 | -5.677576000 | 1.218828000  |

|   |              |              |              |
|---|--------------|--------------|--------------|
| C | -2.582435000 | -3.980181000 | -0.017411000 |
| H | -3.305489000 | -4.515721000 | -0.635035000 |
| C | -0.232095000 | 4.851999000  | -0.457529000 |
| H | 1.335644000  | 1.834113000  | -0.673130000 |
| H | 1.797407000  | 4.276337000  | -1.011045000 |
| H | -0.075416000 | 5.925296000  | -0.590497000 |
| H | -2.306835000 | 5.060153000  | 0.105299000  |
| C | -1.735826000 | -0.082683000 | -4.213683000 |
| C | 1.413496000  | -1.511859000 | -1.727342000 |
| C | 1.615067000  | -2.875418000 | -1.475591000 |
| C | 2.748452000  | -3.244545000 | -0.746993000 |
| C | 3.633169000  | -2.257325000 | -0.319509000 |
| C | 3.357914000  | -0.907653000 | -0.619542000 |
| H | 0.903676000  | -3.620051000 | -1.838133000 |
| H | 2.947049000  | -4.296666000 | -0.527099000 |
| H | 4.541848000  | -2.532075000 | 0.217933000  |
| C | 0.267312000  | -1.055584000 | -2.579644000 |
| C | 0.224007000  | -1.438941000 | -3.927492000 |
| C | -0.787031000 | -0.951610000 | -4.755425000 |
| C | -1.649602000 | 0.236546000  | -2.861045000 |
| N | -0.681594000 | -0.247569000 | -2.057521000 |
| H | 1.000395000  | -2.099535000 | -4.318028000 |
| H | -0.825663000 | -1.237989000 | -5.809425000 |
| H | -2.540556000 | 0.340258000  | -4.818082000 |
| C | 5.139819000  | 0.058817000  | 0.892462000  |
| C | 6.015833000  | 1.089718000  | 1.243592000  |
| C | 4.288908000  | 0.185968000  | -0.222209000 |
| H | 6.661623000  | 0.975055000  | 2.118440000  |
| C | 6.062991000  | 2.264563000  | 0.484733000  |
| C | 4.343352000  | 1.374936000  | -0.975513000 |
| H | 6.751245000  | 3.068845000  | 0.758528000  |
| H | 3.696711000  | 1.477540000  | -1.849100000 |
| C | 5.223883000  | 2.401983000  | -0.627655000 |
| H | 5.259809000  | 3.312886000  | -1.231754000 |
| H | 5.107001000  | -0.842413000 | 1.508920000  |
| H | -2.388702000 | 0.890556000  | -2.392717000 |

(<sup>3</sup>MC<sub>ax 2/S<sub>0</sub></sub>)<sub>stc-mecp</sub> DFT B3LYP/DEF2-SVP CPCM.

|    |              |              |              |
|----|--------------|--------------|--------------|
| Ir | -0.307224000 | -0.184348000 | -0.562711000 |
| N  | 1.498383000  | 0.340741000  | -1.788617000 |
| N  | -1.623069000 | -0.113952000 | 1.802217000  |
| C  | 3.486854000  | -0.574214000 | -2.749454000 |
| C  | 2.383056000  | -0.687990000 | -1.886160000 |
| C  | 1.659236000  | 1.454235000  | -2.522240000 |
| C  | 2.076141000  | -1.866323000 | -1.053227000 |
| C  | 0.881195000  | -1.820184000 | -0.277712000 |
| C  | 0.586308000  | -2.939842000 | 0.524121000  |
| C  | 1.423372000  | -4.059116000 | 0.559272000  |
| C  | 2.592118000  | -4.090856000 | -0.213600000 |
| C  | 2.916002000  | -2.996220000 | -1.014852000 |
| C  | -2.712574000 | -0.902923000 | 1.698573000  |
| C  | -3.619906000 | -1.006046000 | 2.773114000  |
| C  | -2.258835000 | 0.529709000  | 4.027810000  |
| C  | -1.409087000 | 0.582428000  | 2.922532000  |
| C  | -2.882904000 | -1.618627000 | 0.414727000  |
| C  | -1.947747000 | -1.402291000 | -0.626725000 |
| C  | -2.132735000 | -2.081779000 | -1.847206000 |
| C  | -3.204101000 | -2.959850000 | -2.042370000 |

|   |              |              |              |
|---|--------------|--------------|--------------|
| C | -4.124009000 | -3.172807000 | -1.009487000 |
| C | -3.961108000 | -2.504328000 | 0.202199000  |
| H | 3.248477000  | -4.964708000 | -0.190697000 |
| H | 3.831937000  | -3.027704000 | -1.609393000 |
| H | -0.321373000 | -2.942987000 | 1.132479000  |
| H | 1.161801000  | -4.914296000 | 1.189820000  |
| H | -1.425042000 | -1.933741000 | -2.670485000 |
| H | -4.689246000 | -2.681248000 | 0.996150000  |
| H | -3.316258000 | -3.475918000 | -3.000149000 |
| H | -4.965804000 | -3.856074000 | -1.147888000 |
| H | 0.904464000  | 2.234919000  | -2.399988000 |
| C | 3.662176000  | 0.584521000  | -3.502130000 |
| H | 4.201273000  | -1.393138000 | -2.833652000 |
| H | 4.519149000  | 0.675693000  | -4.174467000 |
| C | 2.730728000  | 1.623805000  | -3.393386000 |
| H | 2.829068000  | 2.547000000  | -3.967269000 |
| C | -3.388998000 | -0.288382000 | 3.943654000  |
| H | -0.518591000 | 1.215501000  | 2.946898000  |
| H | -2.035833000 | 1.115054000  | 4.922188000  |
| H | -4.087469000 | -0.365035000 | 4.781049000  |
| H | -4.502986000 | -1.639580000 | 2.693584000  |
| C | -3.626316000 | 2.385345000  | -2.103719000 |
| C | -0.232624000 | 2.876354000  | 0.402634000  |
| C | 0.153153000  | 4.148416000  | 0.848746000  |
| C | 1.354292000  | 4.294737000  | 1.535055000  |
| C | 2.136968000  | 3.168316000  | 1.754660000  |
| C | 1.702588000  | 1.909449000  | 1.296176000  |
| N | 0.531094000  | 1.779452000  | 0.632654000  |
| H | -0.462613000 | 5.022099000  | 0.643053000  |
| H | 1.674606000  | 5.276952000  | 1.890300000  |
| H | 3.078637000  | 3.240270000  | 2.299960000  |
| C | -1.469200000 | 2.712693000  | -0.406634000 |
| C | -2.410735000 | 3.745941000  | -0.544690000 |
| C | -3.501224000 | 3.580993000  | -1.395437000 |
| C | -2.674677000 | 1.390292000  | -1.895530000 |
| N | -1.633069000 | 1.538430000  | -1.058097000 |
| H | -2.300092000 | 4.675129000  | 0.011916000  |
| H | -4.237985000 | 4.380110000  | -1.505958000 |
| H | -4.450435000 | 2.210423000  | -2.797810000 |
| H | -2.751814000 | 0.430599000  | -2.408063000 |
| C | 3.949980000  | 0.824380000  | 1.250141000  |
| C | 4.842538000  | -0.180166000 | 1.631159000  |
| C | 2.587496000  | 0.745777000  | 1.598956000  |
| H | 5.894456000  | -0.108979000 | 1.341851000  |
| C | 4.392063000  | -1.267198000 | 2.389103000  |
| C | 2.142442000  | -0.359123000 | 2.342575000  |
| H | 5.092028000  | -2.046549000 | 2.702079000  |
| H | 1.094360000  | -0.436420000 | 2.630264000  |
| C | 3.042243000  | -1.350717000 | 2.744264000  |
| H | 2.682140000  | -2.195554000 | 3.336517000  |
| H | 4.312012000  | 1.678179000  | 0.671412000  |

(<sup>3</sup>MC<sub>eq 2/S<sub>0</sub></sub>)<sub>stc-mecp</sub> DFT B3LYP/DEF2-SVP CPCM.

|    |              |              |              |
|----|--------------|--------------|--------------|
| Ir | 0.007485000  | -0.314628000 | 0.291380000  |
| N  | -2.145476000 | 0.078369000  | -2.541670000 |
| N  | -0.118396000 | 1.624772000  | -1.077354000 |
| N  | -1.072507000 | 0.783361000  | 1.714308000  |
| N  | 1.068641000  | -1.496482000 | -1.054603000 |

|   |              |              |              |
|---|--------------|--------------|--------------|
| H | -2.832779000 | -1.549804000 | -3.621915000 |
| C | 4.520268000  | 2.269796000  | 0.110520000  |
| C | 3.169018000  | 2.623403000  | 0.081339000  |
| C | 5.032545000  | 1.372393000  | -0.833764000 |
| C | 2.306378000  | 2.065393000  | -0.879882000 |
| C | 4.185734000  | 0.829479000  | -1.806606000 |
| C | 2.830815000  | 1.170381000  | -1.829277000 |
| C | -3.118359000 | -0.749505000 | -2.929247000 |
| C | -4.762818000 | 0.394753000  | -1.611150000 |
| C | -3.752936000 | 1.268901000  | -1.204237000 |
| C | -2.451136000 | 1.075556000  | -1.695997000 |
| C | 0.894429000  | 2.525274000  | -0.993891000 |
| C | 0.647993000  | 3.905540000  | -1.083472000 |
| C | -0.646996000 | 4.362433000  | -1.303882000 |
| C | -1.661450000 | 3.425002000  | -1.487994000 |
| C | -1.367411000 | 2.059049000  | -1.385027000 |
| C | -4.445045000 | -0.633793000 | -2.499311000 |
| C | -2.640834000 | 2.104998000  | 3.594733000  |
| C | 1.393646000  | -2.580731000 | -3.164458000 |
| C | 2.565443000  | -3.174779000 | -2.683097000 |
| C | -3.628359000 | -1.888668000 | 1.896168000  |
| C | -3.853464000 | -3.107994000 | 1.253279000  |
| C | -3.006824000 | -3.519237000 | 0.213996000  |
| C | -1.936947000 | -2.711605000 | -0.185462000 |
| C | -1.692838000 | -1.472938000 | 0.437897000  |
| C | -2.557553000 | -1.070281000 | 1.498028000  |
| C | -0.689522000 | 1.976922000  | 2.207468000  |
| C | -1.444249000 | 2.673341000  | 3.145104000  |
| C | -3.039290000 | 0.871714000  | 3.085118000  |
| C | -2.243706000 | 0.217366000  | 2.132604000  |
| C | 3.691550000  | -2.095184000 | 1.487437000  |
| C | 3.980587000  | -1.614341000 | 2.766250000  |
| C | 3.165045000  | -0.631395000 | 3.345713000  |
| C | 2.059670000  | -0.131438000 | 2.649918000  |
| C | 1.752005000  | -0.588157000 | 1.353709000  |
| C | 2.589744000  | -1.589509000 | 0.776792000  |
| C | 0.670237000  | -1.747374000 | -2.316767000 |
| C | 2.231698000  | -2.029174000 | -0.579029000 |
| C | 2.987516000  | -2.891778000 | -1.386054000 |
| H | 2.178830000  | 0.763177000  | -2.604580000 |
| H | 5.176769000  | 2.700149000  | 0.871389000  |
| H | 2.776471000  | 3.328912000  | 0.818322000  |
| H | 6.091937000  | 1.102641000  | -0.816426000 |
| H | 4.582707000  | 0.141525000  | -2.557618000 |
| H | -5.202517000 | -1.337311000 | -2.851933000 |
| H | -5.782958000 | 0.517358000  | -1.238170000 |
| H | -3.967271000 | 2.081570000  | -0.507596000 |
| H | 1.484837000  | 4.601410000  | -1.009543000 |
| H | -0.857270000 | 5.432366000  | -1.375161000 |
| H | -2.674138000 | 3.740395000  | -1.742161000 |
| H | -3.973115000 | 0.415646000  | 3.414630000  |
| H | -3.258959000 | 2.620171000  | 4.334007000  |
| H | -1.091502000 | 3.637845000  | 3.514136000  |
| H | 0.257345000  | 2.375436000  | 1.838864000  |
| H | 1.037033000  | -2.757786000 | -4.180646000 |
| H | 3.152209000  | -3.843462000 | -3.317740000 |
| H | 3.910422000  | -3.325813000 | -1.000256000 |
| H | -0.248203000 | -1.244225000 | -2.632447000 |

|   |              |              |              |
|---|--------------|--------------|--------------|
| H | -4.685389000 | -3.743104000 | 1.568320000  |
| H | -3.182396000 | -4.475813000 | -0.286888000 |
| H | -4.285323000 | -1.588914000 | 2.716307000  |
| H | -1.291735000 | -3.059217000 | -0.995753000 |
| H | 3.392337000  | -0.255117000 | 4.347447000  |
| H | 1.438438000  | 0.627836000  | 3.131082000  |
| H | 4.326868000  | -2.869170000 | 1.050213000  |
| H | 4.839717000  | -2.009264000 | 3.314556000  |

**Complex 3 in CH<sub>2</sub>Cl<sub>2</sub>.**

(S<sub>0</sub>)<sub>min</sub> DFT B3LYP/DEF2-SVP CPCM.

|    |              |              |              |
|----|--------------|--------------|--------------|
| Ir | 0.054799000  | 0.016143000  | 0.100997000  |
| N  | 0.530805000  | -0.936489000 | -1.690972000 |
| N  | -0.357905000 | 0.816440000  | 1.985880000  |
| C  | 1.676638000  | -2.780047000 | -2.712829000 |
| C  | 1.304044000  | -2.057245000 | -1.567079000 |
| C  | 0.169015000  | -0.501118000 | -2.913129000 |
| C  | 1.695545000  | -2.373913000 | -0.191185000 |
| C  | 1.279397000  | -1.436150000 | 0.794030000  |
| C  | 1.636252000  | -1.693230000 | 2.129364000  |
| C  | 2.370649000  | -2.831902000 | 2.476597000  |
| C  | 2.773160000  | -3.749898000 | 1.495918000  |
| C  | 2.438729000  | -3.516392000 | 0.162878000  |
| C  | -1.322943000 | 0.165125000  | 2.701041000  |
| C  | -1.682509000 | 0.630777000  | 3.976853000  |
| C  | -0.044980000 | 2.383154000  | 3.776854000  |
| C  | 0.265055000  | 1.887263000  | 2.515446000  |
| C  | -1.878298000 | -1.014983000 | 2.032497000  |
| C  | -1.363266000 | -1.285095000 | 0.734788000  |
| C  | -1.828614000 | -2.435285000 | 0.075852000  |
| C  | -2.767463000 | -3.283091000 | 0.673519000  |
| C  | -3.272340000 | -3.001685000 | 1.951604000  |
| C  | -2.829894000 | -1.866095000 | 2.627447000  |
| H  | 3.342587000  | -4.641292000 | 1.771163000  |
| H  | 2.751297000  | -4.231719000 | -0.601980000 |
| H  | 1.334774000  | -1.004035000 | 2.921436000  |
| H  | 2.628773000  | -3.008127000 | 3.525395000  |
| H  | -1.456218000 | -2.682902000 | -0.920826000 |
| H  | -3.220117000 | -1.649684000 | 3.625186000  |
| H  | -3.108626000 | -4.174312000 | 0.138032000  |
| H  | -4.004394000 | -3.666929000 | 2.416619000  |
| H  | -0.413916000 | 0.420161000  | -2.941704000 |
| C  | 1.278354000  | -2.343464000 | -3.972526000 |
| H  | 2.288197000  | -3.676724000 | -2.608401000 |
| H  | 1.566985000  | -2.903686000 | -4.865374000 |
| C  | 0.517764000  | -1.172915000 | -4.079242000 |
| H  | 0.196895000  | -0.781535000 | -5.046142000 |
| C  | -1.045181000 | 1.743160000  | 4.517803000  |
| H  | 1.039856000  | 2.348963000  | 1.902125000  |
| H  | 0.489878000  | 3.252556000  | 4.162904000  |
| H  | -1.321247000 | 2.106596000  | 5.510827000  |
| H  | -2.458901000 | 0.113370000  | 4.540986000  |
| C  | -3.436616000 | 2.933617000  | -0.174105000 |
| C  | 0.697198000  | 2.846246000  | -0.991883000 |
| C  | 1.219091000  | 3.911641000  | -1.735904000 |
| C  | 2.541657000  | 3.855579000  | -2.165295000 |
| C  | 3.305818000  | 2.756188000  | -1.796338000 |

|   |              |              |              |
|---|--------------|--------------|--------------|
| C | 2.740237000  | 1.729283000  | -1.017450000 |
| N | 1.433635000  | 1.757148000  | -0.654237000 |
| H | 0.582391000  | 4.753805000  | -2.006400000 |
| H | 2.969239000  | 4.660982000  | -2.767103000 |
| H | 4.358433000  | 2.689155000  | -2.074304000 |
| C | -0.740849000 | 2.882836000  | -0.614068000 |
| C | -1.351597000 | 4.100560000  | -0.291072000 |
| C | -2.719044000 | 4.115027000  | -0.024837000 |
| C | -2.770668000 | 1.741682000  | -0.516391000 |
| N | -1.420214000 | 1.712300000  | -0.645800000 |
| H | -0.761128000 | 5.015033000  | -0.231074000 |
| H | -3.222704000 | 5.042993000  | 0.256134000  |
| H | -4.521929000 | 2.926292000  | -0.066832000 |
| C | 4.457637000  | -0.037942000 | -1.481766000 |
| C | 5.455425000  | -0.915568000 | -1.050184000 |
| C | 3.673466000  | 0.665747000  | -0.549333000 |
| H | 6.050001000  | -1.464698000 | -1.785284000 |
| C | 5.699808000  | -1.080707000 | 0.318086000  |
| C | 3.915091000  | 0.482549000  | 0.821818000  |
| H | 6.490962000  | -1.755088000 | 0.656723000  |
| H | 3.324198000  | 1.036356000  | 1.554405000  |
| C | 4.929070000  | -0.378333000 | 1.250752000  |
| H | 5.116505000  | -0.501651000 | 2.320409000  |
| H | 4.282784000  | 0.102663000  | -2.551628000 |
| C | -3.604463000 | 0.557940000  | -0.863859000 |
| C | -4.723551000 | 0.210262000  | -0.084485000 |
| H | -4.906748000 | 0.722787000  | 0.863068000  |
| C | -5.597511000 | -0.795499000 | -0.503801000 |
| H | -6.456049000 | -1.059959000 | 0.119273000  |
| C | -5.377747000 | -1.459226000 | -1.716376000 |
| H | -6.068855000 | -2.238480000 | -2.048851000 |
| C | -4.272447000 | -1.116019000 | -2.502307000 |
| H | -4.099378000 | -1.620866000 | -3.456572000 |
| C | -3.391502000 | -0.118041000 | -2.078247000 |
| H | -2.551351000 | 0.165437000  | -2.712356000 |

(<sup>3</sup>MLCT)<sub>min</sub> DFT B3LYP/DEF2-SVP CPCM.

|    |              |              |              |
|----|--------------|--------------|--------------|
| Ir | 0.047003000  | 0.214113000  | 0.163565000  |
| N  | 0.696096000  | -1.366237000 | -1.027329000 |
| N  | -0.605507000 | 1.683722000  | 1.514318000  |
| C  | 1.887302000  | -3.446188000 | -1.044242000 |
| C  | 1.476354000  | -2.281946000 | -0.380979000 |
| C  | 0.412726000  | -1.519844000 | -2.330457000 |
| C  | 1.861669000  | -1.886213000 | 0.976325000  |
| C  | 1.380158000  | -0.605688000 | 1.401715000  |
| C  | 1.773401000  | -0.130963000 | 2.673397000  |
| C  | 2.584456000  | -0.904942000 | 3.501562000  |
| C  | 3.021682000  | -2.173295000 | 3.082561000  |
| C  | 2.663890000  | -2.662000000 | 1.821994000  |
| C  | -1.660003000 | 1.310148000  | 2.295796000  |
| C  | -2.222103000 | 2.222808000  | 3.200640000  |
| C  | -0.586129000 | 3.854250000  | 2.528397000  |
| C  | -0.075335000 | 2.914092000  | 1.637590000  |
| C  | -2.085244000 | -0.082837000 | 2.119194000  |
| C  | -1.402641000 | -0.827214000 | 1.109815000  |
| C  | -1.730881000 | -2.187716000 | 0.945772000  |
| C  | -2.675357000 | -2.798870000 | 1.768271000  |
| C  | -3.334917000 | -2.057865000 | 2.762753000  |



|   |              |              |              |
|---|--------------|--------------|--------------|
| C | -3.044351000 | -0.703719000 | 2.935035000  |
| H | 3.648481000  | -2.780198000 | 3.740686000  |
| H | 3.017810000  | -3.646589000 | 1.508808000  |
| H | 1.433044000  | 0.844754000  | 3.025682000  |
| H | 2.875344000  | -0.528277000 | 4.485898000  |
| H | -1.245508000 | -2.781284000 | 0.169661000  |
| H | -3.555335000 | -0.142513000 | 3.720115000  |
| H | -2.906500000 | -3.859131000 | 1.636488000  |
| H | -4.077738000 | -2.539646000 | 3.403512000  |
| H | -0.152068000 | -0.713045000 | -2.796557000 |
| C | 1.547843000  | -3.634222000 | -2.382486000 |
| H | 2.488571000  | -4.186640000 | -0.516301000 |
| H | 1.866537000  | -4.537294000 | -2.908570000 |
| C | 0.821512000  | -2.641574000 | -3.047491000 |
| H | 0.564861000  | -2.728391000 | -4.104586000 |
| C | -1.686813000 | 3.503771000  | 3.314720000  |
| H | 0.787390000  | 3.140902000  | 1.013160000  |
| H | -0.121335000 | 4.839258000  | 2.595086000  |
| H | -2.119524000 | 4.219227000  | 4.018159000  |
| H | -3.072788000 | 1.925471000  | 3.814061000  |
| C | -3.648030000 | 1.974443000  | -1.916938000 |
| C | 0.479445000  | 2.700993000  | -1.512738000 |
| C | 1.078712000  | 3.947372000  | -1.861543000 |
| C | 2.433676000  | 4.133811000  | -1.743358000 |
| C | 3.235948000  | 3.044275000  | -1.319951000 |
| C | 2.637701000  | 1.832324000  | -0.997252000 |
| N | 1.276495000  | 1.663542000  | -1.017715000 |
| H | 0.457683000  | 4.764194000  | -2.224624000 |
| H | 2.889647000  | 5.091407000  | -2.006002000 |
| H | 4.323143000  | 3.123348000  | -1.296299000 |
| C | -0.931631000 | 2.476905000  | -1.632542000 |
| C | -1.812344000 | 3.505119000  | -2.082357000 |
| C | -3.159251000 | 3.269777000  | -2.202807000 |
| C | -2.770239000 | 0.982986000  | -1.483534000 |
| N | -1.437535000 | 1.224980000  | -1.281941000 |
| H | -1.417330000 | 4.489022000  | -2.328184000 |
| H | -3.835598000 | 4.058815000  | -2.540528000 |
| H | -4.696266000 | 1.723810000  | -2.079904000 |
| C | 3.751208000  | -0.323981000 | -1.655910000 |
| C | 4.765527000  | -1.273208000 | -1.496664000 |
| C | 3.580536000  | 0.705555000  | -0.714283000 |
| H | 4.892727000  | -2.059643000 | -2.245489000 |
| C | 5.622940000  | -1.210299000 | -0.392260000 |
| C | 4.455519000  | 0.767824000  | 0.385190000  |
| H | 6.418400000  | -1.950664000 | -0.270752000 |
| H | 4.348843000  | 1.576694000  | 1.112425000  |
| C | 5.463116000  | -0.187813000 | 0.549695000  |
| H | 6.131102000  | -0.127727000 | 1.413340000  |
| H | 3.106825000  | -0.361339000 | -2.537398000 |
| C | -3.374627000 | -0.380275000 | -1.350000000 |
| C | -4.496470000 | -0.574084000 | -0.522523000 |
| H | -4.832321000 | 0.239404000  | 0.124906000  |
| C | -5.180744000 | -1.792356000 | -0.517950000 |
| H | -6.045439000 | -1.924803000 | 0.138102000  |
| C | -4.765980000 | -2.837604000 | -1.350893000 |
| H | -5.305999000 | -3.788382000 | -1.352653000 |
| C | -3.662557000 | -2.651936000 | -2.190648000 |
| H | -3.341689000 | -3.452851000 | -2.862588000 |

|   |              |              |              |
|---|--------------|--------------|--------------|
| C | -2.977311000 | -1.433525000 | -2.191899000 |
| H | -2.153884000 | -1.284283000 | -2.889272000 |

(<sup>3</sup>MC<sub>ax 1</sub>)<sub>min</sub> DFT B3LYP/DEF2-SVP CPCM.

|    |              |              |              |
|----|--------------|--------------|--------------|
| Ir | -0.114698000 | -0.194612000 | 0.015964000  |
| N  | 0.899257000  | -1.311046000 | -1.619657000 |
| N  | -0.344016000 | 1.881557000  | 1.603136000  |
| C  | 2.286708000  | -3.204990000 | -2.072494000 |
| C  | 1.695391000  | -2.314334000 | -1.158320000 |
| C  | 0.676165000  | -1.164023000 | -2.937405000 |
| C  | 1.863543000  | -2.361329000 | 0.303362000  |
| C  | 1.158621000  | -1.386601000 | 1.066032000  |
| C  | 1.335685000  | -1.402293000 | 2.462093000  |
| C  | 2.159591000  | -2.344621000 | 3.084751000  |
| C  | 2.835074000  | -3.308437000 | 2.323343000  |
| C  | 2.688934000  | -3.311880000 | 0.937176000  |
| C  | -1.394667000 | 1.680362000  | 2.427296000  |
| C  | -1.862986000 | 2.726747000  | 3.247806000  |
| C  | -0.128332000 | 4.145952000  | 2.374288000  |
| C  | 0.268506000  | 3.070324000  | 1.580248000  |
| C  | -1.974488000 | 0.321756000  | 2.419047000  |
| C  | -1.500859000 | -0.618849000 | 1.471683000  |
| C  | -1.991629000 | -1.936550000 | 1.537523000  |
| C  | -2.950181000 | -2.313170000 | 2.481692000  |
| C  | -3.436313000 | -1.373108000 | 3.398815000  |
| C  | -2.946575000 | -0.069841000 | 3.365278000  |
| H  | 3.474735000  | -4.050299000 | 2.808433000  |
| H  | 3.224916000  | -4.060069000 | 0.348612000  |
| H  | 0.813809000  | -0.668161000 | 3.080401000  |
| H  | 2.272471000  | -2.332184000 | 4.173118000  |
| H  | -1.625518000 | -2.691777000 | 0.836800000  |
| H  | -3.313589000 | 0.647698000  | 4.101939000  |
| H  | -3.312338000 | -3.344976000 | 2.504045000  |
| H  | -4.182255000 | -1.658368000 | 4.145106000  |
| H  | 0.030800000  | -0.333571000 | -3.233550000 |
| C  | 2.056862000  | -3.054224000 | -3.436990000 |
| H  | 2.922944000  | -4.013383000 | -1.712074000 |
| H  | 2.514672000  | -3.745984000 | -4.148685000 |
| C  | 1.235862000  | -2.012166000 | -3.886299000 |
| H  | 1.032936000  | -1.855879000 | -4.947239000 |
| C  | -1.226620000 | 3.964522000  | 3.220232000  |
| H  | 1.115764000  | 3.174444000  | 0.898695000  |
| H  | 0.408896000  | 5.095070000  | 2.322550000  |
| H  | -1.584164000 | 4.779960000  | 3.854388000  |
| H  | -2.721918000 | 2.573367000  | 3.900940000  |
| C  | -3.805443000 | 1.972970000  | -1.475817000 |
| C  | 0.388392000  | 2.372152000  | -1.777604000 |
| C  | 0.875431000  | 3.250866000  | -2.755766000 |
| C  | 2.245563000  | 3.303830000  | -2.996913000 |
| C  | 3.086183000  | 2.498212000  | -2.238839000 |
| C  | 2.546771000  | 1.642216000  | -1.259461000 |
| N  | 1.209745000  | 1.571512000  | -1.060249000 |
| H  | 0.188150000  | 3.859676000  | -3.342442000 |
| H  | 2.650385000  | 3.971129000  | -3.761482000 |
| H  | 4.167700000  | 2.540438000  | -2.372073000 |
| C  | -1.083666000 | 2.273995000  | -1.570201000 |
| C  | -1.901228000 | 3.387449000  | -1.800386000 |
| C  | -3.283729000 | 3.239353000  | -1.714691000 |

|   |              |              |              |
|---|--------------|--------------|--------------|
| C | -2.938992000 | 0.889076000  | -1.245979000 |
| N | -1.594250000 | 1.070802000  | -1.214663000 |
| H | -1.460925000 | 4.357609000  | -2.029363000 |
| H | -3.945086000 | 4.094749000  | -1.871329000 |
| H | -4.882627000 | 1.804551000  | -1.493365000 |
| C | 4.566628000  | 0.179734000  | -1.039822000 |
| C | 5.562697000  | -0.430739000 | -0.274468000 |
| C | 3.510137000  | 0.875450000  | -0.420343000 |
| H | 6.369548000  | -0.976734000 | -0.770583000 |
| C | 5.531330000  | -0.334744000 | 1.121683000  |
| C | 3.477538000  | 0.948906000  | 0.982137000  |
| H | 6.318578000  | -0.798704000 | 1.722009000  |
| H | 2.673153000  | 1.491390000  | 1.479954000  |
| C | 4.488054000  | 0.357269000  | 1.745143000  |
| H | 4.457447000  | 0.437549000  | 2.834623000  |
| H | 4.604348000  | 0.110142000  | -2.129944000 |
| C | -3.515017000 | -0.477644000 | -1.136908000 |
| C | -4.722557000 | -0.696881000 | -0.448312000 |
| H | -5.193930000 | 0.122781000  | 0.099058000  |
| C | -5.311454000 | -1.962928000 | -0.431347000 |
| H | -6.241894000 | -2.118741000 | 0.120947000  |
| C | -4.712779000 | -3.028216000 | -1.113929000 |
| H | -5.178296000 | -4.017433000 | -1.104831000 |
| C | -3.519402000 | -2.818222000 | -1.813423000 |
| H | -3.052193000 | -3.640163000 | -2.362369000 |
| C | -2.924575000 | -1.554137000 | -1.824164000 |
| H | -2.010731000 | -1.393551000 | -2.396567000 |

( ${}^3\text{MC}_{\text{eq } 1}$ )<sub>min</sub> DFT B3LYP/DEF2-SVP CPCM.

|    |              |              |              |
|----|--------------|--------------|--------------|
| Ir | -0.795149000 | 0.302301000  | -0.500973000 |
| N  | 2.336911000  | 0.469312000  | 1.413002000  |
| N  | -0.600602000 | 0.365084000  | 1.892392000  |
| N  | -1.385632000 | 2.308307000  | -0.398514000 |
| N  | -0.217677000 | -1.681644000 | -0.733444000 |
| C  | 4.225915000  | -1.701630000 | 1.454853000  |
| C  | 5.002759000  | -2.843785000 | 1.245812000  |
| C  | 5.947589000  | -2.874086000 | 0.212703000  |
| C  | 6.111301000  | -1.751930000 | -0.607230000 |
| C  | 5.339583000  | -0.606032000 | -0.394727000 |
| C  | 4.384274000  | -0.565124000 | 0.638695000  |
| C  | -4.812670000 | -1.970561000 | 1.767800000  |
| C  | -3.977096000 | -0.901097000 | 2.099924000  |
| C  | -4.269004000 | -3.236930000 | 1.522640000  |
| C  | -2.582847000 | -1.079157000 | 2.166921000  |
| C  | -2.885122000 | -3.427477000 | 1.608435000  |
| C  | -2.045695000 | -2.356189000 | 1.925105000  |
| C  | 3.558844000  | 0.651083000  | 0.884651000  |
| C  | 3.254128000  | 3.047665000  | 0.887425000  |
| C  | 1.991452000  | 2.850030000  | 1.449056000  |
| C  | 1.571776000  | 1.533199000  | 1.691836000  |
| C  | -1.698314000 | 0.031796000  | 2.617432000  |
| C  | -1.999481000 | 0.686426000  | 3.823213000  |
| C  | -1.144727000 | 1.673527000  | 4.303420000  |
| C  | 0.019107000  | 1.953977000  | 3.589726000  |
| C  | 0.273437000  | 1.272640000  | 2.392606000  |
| C  | 4.052227000  | 1.941679000  | 0.605629000  |
| C  | -2.045895000 | 5.011597000  | -0.413435000 |
| C  | 1.275615000  | -3.529418000 | -0.435426000 |

|   |              |              |              |
|---|--------------|--------------|--------------|
| C | 0.430632000  | -4.341892000 | -1.199782000 |
| C | 1.236724000  | 3.239579000  | -2.841346000 |
| C | 2.258716000  | 2.570524000  | -3.518443000 |
| C | 2.484528000  | 1.206737000  | -3.278502000 |
| C | 1.691316000  | 0.510479000  | -2.361386000 |
| C | 0.660860000  | 1.164256000  | -1.656938000 |
| C | 0.437565000  | 2.549927000  | -1.914089000 |
| C | -2.409337000 | 2.766871000  | 0.347700000  |
| C | -2.769935000 | 4.109528000  | 0.373927000  |
| C | -0.988643000 | 4.539423000  | -1.187018000 |
| C | -0.660490000 | 3.175445000  | -1.166823000 |
| C | -3.270041000 | -2.369896000 | -2.710821000 |
| C | -4.416440000 | -1.655136000 | -3.064979000 |
| C | -4.595581000 | -0.342062000 | -2.603735000 |
| C | -3.629726000 | 0.258261000  | -1.790999000 |
| C | -2.469254000 | -0.444471000 | -1.408593000 |
| C | -2.298498000 | -1.780062000 | -1.884918000 |
| C | 0.916576000  | -2.201531000 | -0.226672000 |
| C | -1.072115000 | -2.464024000 | -1.456273000 |
| C | -0.749493000 | -3.805085000 | -1.709243000 |
| H | 3.494402000  | -1.674100000 | 2.265111000  |
| H | 4.874171000  | -3.713137000 | 1.896589000  |
| H | 6.554333000  | -3.768548000 | 0.047734000  |
| H | 6.840867000  | -1.769307000 | -1.421444000 |
| H | 5.466948000  | 0.254718000  | -1.055369000 |
| H | -0.968869000 | -2.513579000 | 2.012500000  |
| H | -5.892893000 | -1.815092000 | 1.704284000  |
| H | -4.407810000 | 0.084230000  | 2.296733000  |
| H | -4.923677000 | -4.075890000 | 1.271975000  |
| H | -2.455792000 | -4.417629000 | 1.434894000  |
| H | 5.055786000  | 2.075095000  | 0.199111000  |
| H | 3.616722000  | 4.057999000  | 0.681655000  |
| H | 1.341413000  | 3.694045000  | 1.686120000  |
| H | -2.889204000 | 0.393517000  | 4.382575000  |
| H | -1.363306000 | 2.194125000  | 5.239058000  |
| H | 0.745830000  | 2.676735000  | 3.963417000  |
| H | -0.409103000 | 5.226014000  | -1.804708000 |
| H | -2.303519000 | 6.073456000  | -0.423300000 |
| H | -3.606648000 | 4.431795000  | 0.995924000  |
| H | -2.957914000 | 2.024849000  | 0.930517000  |
| H | 2.205207000  | -3.908325000 | -0.007923000 |
| H | 0.686289000  | -5.386934000 | -1.391120000 |
| H | -1.429784000 | -4.424585000 | -2.294237000 |
| H | 1.534379000  | -1.516925000 | 0.360359000  |
| H | 2.877010000  | 3.111010000  | -4.239709000 |
| H | 3.284511000  | 0.684659000  | -3.811407000 |
| H | 1.063695000  | 4.298649000  | -3.046727000 |
| H | 1.887753000  | -0.551095000 | -2.194079000 |
| H | -5.494133000 | 0.215951000  | -2.882766000 |
| H | -3.791831000 | 1.284649000  | -1.453386000 |
| H | -3.137136000 | -3.387263000 | -3.086900000 |
| H | -5.170069000 | -2.119521000 | -3.706074000 |

**(<sup>3</sup>MLCT/<sup>3</sup>MC<sub>ax 1</sub>)<sub>CI-NEB</sub>** DFT B3LYP/DEF2-SVP CPCM.

|    |              |              |              |
|----|--------------|--------------|--------------|
| Ir | -0.041703508 | 0.032719000  | 0.061944177  |
| N  | 0.829747834  | -1.228699434 | -1.275477795 |
| N  | -0.453500772 | 1.656477642  | 1.539356896  |
| C  | 1.927647110  | -3.363815333 | -1.544085609 |

|   |              |              |              |
|---|--------------|--------------|--------------|
| C | 1.539165186  | -2.293929495 | -0.725060398 |
| C | 0.581171447  | -1.207561150 | -2.622550552 |
| C | 1.823004023  | -2.132062749 | 0.690065557  |
| C | 1.235451097  | -0.985471900 | 1.292077761  |
| C | 1.477282207  | -0.749267063 | 2.653385696  |
| C | 2.280180801  | -1.619188594 | 3.400060410  |
| C | 2.848331315  | -2.755354191 | 2.801199242  |
| C | 2.621602433  | -3.011696014 | 1.451954618  |
| C | -1.517271953 | 1.401793130  | 2.351876112  |
| C | -2.006685890 | 2.404237439  | 3.205158281  |
| C | -0.270786730 | 3.876603826  | 2.428085488  |
| C | 0.162740510  | 2.850236031  | 1.595582763  |
| C | -2.040741909 | 0.033174278  | 2.272716547  |
| C | -1.453399500 | -0.809301129 | 1.302115601  |
| C | -1.820365868 | -2.160754188 | 1.258412654  |
| C | -2.799422133 | -2.653727964 | 2.127471176  |
| C | -3.405253560 | -1.811018079 | 3.069866205  |
| C | -3.022256234 | -0.473790888 | 3.147281499  |
| H | 3.472661020  | -3.433382378 | 3.388641762  |
| H | 3.075412266  | -3.889328108 | 0.984702649  |
| H | 1.032002425  | 0.114066808  | 3.152963114  |
| H | 2.460713249  | -1.413313893 | 4.459312528  |
| H | -1.356275080 | -2.839524735 | 0.538210604  |
| H | -3.475694382 | 0.171413632  | 3.903218212  |
| H | -3.090649971 | -3.706293916 | 2.069900738  |
| H | -4.165204007 | -2.201705439 | 3.751294140  |
| H | 0.074097791  | -0.320273934 | -3.004217940 |
| C | 1.650145511  | -3.348050115 | -2.907719213 |
| H | 2.471695237  | -4.200855463 | -1.103178260 |
| H | 1.965799377  | -4.175746073 | -3.547004638 |
| C | 0.967883936  | -2.235722985 | -3.454404817 |
| H | 0.753905048  | -2.169697739 | -4.522967347 |
| C | -1.389582260 | 3.651536372  | 3.236364014  |
| H | 1.037765083  | 2.977658481  | 0.960016623  |
| H | 0.263529553  | 4.828182455  | 2.435563069  |
| H | -1.770515594 | 4.438518311  | 3.891838673  |
| H | -2.867797698 | 2.200670154  | 3.841867769  |
| C | -3.737632846 | 2.005660331  | -1.676378194 |
| C | 0.442517214  | 2.598784032  | -1.677604987 |
| C | 0.966756412  | 3.629925228  | -2.480257814 |
| C | 2.339771536  | 3.771777403  | -2.609110764 |
| C | 3.168642203  | 2.845643141  | -1.971854342 |
| C | 2.605652000  | 1.821275470  | -1.200764620 |
| N | 1.264549879  | 1.725668197  | -1.026116153 |
| H | 0.299234327  | 4.302185344  | -3.016704083 |
| H | 2.761250764  | 4.579877040  | -3.211214419 |
| H | 4.254436594  | 2.913010713  | -2.050420195 |
| C | -1.021749371 | 2.429110110  | -1.572563653 |
| C | -1.881859640 | 3.504195808  | -1.863748318 |
| C | -3.252833595 | 3.296676657  | -1.893323375 |
| C | -2.849734208 | 0.966699535  | -1.364712618 |
| N | -1.511753004 | 1.194382962  | -1.250686546 |
| H | -1.476793327 | 4.497436143  | -2.051015968 |
| H | -3.935941873 | 4.121204716  | -2.109611290 |
| H | -4.801128022 | 1.786134735  | -1.772306894 |
| C | 4.218177142  | -0.071798376 | -1.418111183 |
| C | 5.244226711  | -0.878883308 | -0.918230528 |
| C | 3.568293974  | 0.854825572  | -0.584260514 |

|   |              |              |              |
|---|--------------|--------------|--------------|
| H | 5.736553340  | -1.599488935 | -1.577066377 |
| C | 5.646135358  | -0.753547594 | 0.416061791  |
| C | 3.970011338  | 0.969089240  | 0.755305361  |
| H | 6.457945757  | -1.374156417 | 0.805201184  |
| H | 3.484314415  | 1.698588374  | 1.408011796  |
| C | 5.007479632  | 0.171307873  | 1.249610834  |
| H | 5.318848575  | 0.273279406  | 2.292481843  |
| H | 3.922475802  | -0.153721023 | -2.467409110 |
| C | -3.420889557 | -0.405560414 | -1.246848045 |
| C | -4.595826895 | -0.616383768 | -0.500163106 |
| H | -5.015635972 | 0.201893590  | 0.089881127  |
| C | -5.220440280 | -1.864967705 | -0.491242327 |
| H | -6.125503071 | -2.012709651 | 0.104111256  |
| C | -4.691426704 | -2.922246513 | -1.240704762 |
| H | -5.187408301 | -3.896778713 | -1.241844768 |
| C | -3.529282169 | -2.721877073 | -1.992767333 |
| H | -3.116941397 | -3.537547202 | -2.592848030 |
| C | -2.897491010 | -1.474576877 | -1.994817482 |
| H | -2.011829138 | -1.322142660 | -2.611795401 |

**(<sup>3</sup>MLCT/<sup>3</sup>MC<sub>eq 1</sub>)<sub>CI-NEB</sub>** DFT B3LYP/DEF2-SVP CPCM.

|    |              |              |              |
|----|--------------|--------------|--------------|
| Ir | -0.285594523 | 0.211020771  | -0.129660269 |
| N  | 1.792437864  | 0.815649378  | 1.349908223  |
| N  | -0.850293890 | 0.314341338  | 2.137666404  |
| N  | -0.618509676 | 2.257980372  | -0.281019670 |
| N  | 0.000442767  | -1.855790426 | -0.112664149 |
| C  | 3.982135928  | -1.171076562 | 0.484151163  |
| C  | 4.815344607  | -2.041841696 | -0.224623544 |
| C  | 5.522329468  | -1.584409172 | -1.341994081 |
| C  | 5.395136273  | -0.248265550 | -1.739351777 |
| C  | 4.560174552  | 0.620116542  | -1.031258800 |
| C  | 3.830090609  | 0.168405891  | 0.084346622  |
| C  | -4.981001180 | -1.950242187 | 1.127809655  |
| C  | -4.152092686 | -0.914624845 | 1.568794456  |
| C  | -4.524399404 | -3.273287440 | 1.146734567  |
| C  | -2.846791363 | -1.186926747 | 2.016050354  |
| C  | -3.232590106 | -3.553617630 | 1.604770137  |
| C  | -2.397460627 | -2.518327170 | 2.036568910  |
| C  | 3.049722136  | 1.126070483  | 0.922722009  |
| C  | 3.076959316  | 3.161759835  | 2.237103492  |
| C  | 1.825090752  | 2.809411428  | 2.728909889  |
| C  | 1.220548115  | 1.618006521  | 2.291011840  |
| C  | -2.029696903 | -0.111065167 | 2.658069147  |
| C  | -2.518489486 | 0.402388467  | 3.868855090  |
| C  | -1.750903104 | 1.312882695  | 4.593571645  |
| C  | -0.508349615 | 1.680422902  | 4.095460097  |
| C  | -0.079295349 | 1.186557785  | 2.851679167  |
| C  | 3.703974554  | 2.291940653  | 1.339001115  |
| C  | -0.978681286 | 4.997151473  | -0.730577006 |
| C  | 1.070227161  | -3.886605822 | 0.568081823  |
| C  | 0.280057245  | -4.612302903 | -0.333974339 |
| C  | 1.449317157  | 2.338358796  | -3.355723303 |
| C  | 2.132039413  | 1.388120342  | -4.108852141 |
| C  | 2.165676094  | 0.037425691  | -3.697277695 |
| C  | 1.529322580  | -0.351136559 | -2.523874238 |
| C  | 0.833383176  | 0.591161571  | -1.731644944 |
| C  | 0.795722481  | 1.963860744  | -2.164238915 |
| C  | -1.435016419 | 2.989347906  | 0.514692660  |

|   |              |              |              |
|---|--------------|--------------|--------------|
| C | -1.638346086 | 4.347479720  | 0.330194534  |
| C | -0.161442011 | 4.247204923  | -1.568337054 |
| C | 0.012502119  | 2.870391423  | -1.345236132 |
| C | -2.835828863 | -2.227610664 | -2.460482344 |
| C | -3.838587326 | -1.385042756 | -2.943935314 |
| C | -3.882951570 | -0.034826549 | -2.551873004 |
| C | -2.915247753 | 0.478397533  | -1.689083511 |
| C | -1.901624490 | -0.355271709 | -1.168479082 |
| C | -1.876885419 | -1.734078784 | -1.561201334 |
| C | 0.895929731  | -2.509235182 | 0.646492835  |
| C | -0.836014079 | -2.553441521 | -0.941294455 |
| C | -0.683611536 | -3.941817774 | -1.082196733 |
| H | 3.481413073  | -1.521031712 | 1.387566354  |
| H | 4.926310258  | -3.077077054 | 0.109746242  |
| H | 6.179388726  | -2.263069779 | -1.892906484 |
| H | 5.949584248  | 0.120171924  | -2.606815191 |
| H | 4.464327176  | 1.659370922  | -1.355119488 |
| H | -1.401685191 | -2.748719184 | 2.421771405  |
| H | -5.990639845 | -1.723391654 | 0.774844079  |
| H | -4.519344194 | 0.114772445  | 1.566103049  |
| H | -5.176958087 | -4.084695521 | 0.813107923  |
| H | -2.873721311 | -4.585740016 | 1.636373523  |
| H | 4.721208858  | 2.485814521  | 0.994527708  |
| H | 3.571049619  | 4.077914619  | 2.567266440  |
| H | 1.318724567  | 3.462566550  | 3.438480575  |
| H | -3.480256777 | 0.050726564  | 4.244322637  |
| H | -2.106058416 | 1.709004978  | 5.547791272  |
| H | 0.132323383  | 2.349175673  | 4.667904075  |
| H | 0.347620600  | 4.722379179  | -2.407701624 |
| H | -1.116263103 | 6.067032445  | -0.902150644 |
| H | -2.312377562 | 4.884197755  | 1.000526469  |
| H | -1.960594226 | 2.453584294  | 1.304667291  |
| H | 1.819780155  | -4.372651618 | 1.194912657  |
| H | 0.403233788  | -5.693092804 | -0.436939204 |
| H | -1.335537157 | -4.492254128 | -1.760963983 |
| H | 1.480005845  | -1.888737186 | 1.323144025  |
| H | 2.639856249  | 1.691336542  | -5.028009830 |
| H | 2.703665140  | -0.701198344 | -4.296961221 |
| H | 1.412631340  | 3.373761382  | -3.703041512 |
| H | 1.569610549  | -1.398619393 | -2.218891973 |
| H | -4.675164555 | 0.616454099  | -2.931178441 |
| H | -2.952062492 | 1.535609084  | -1.417417566 |
| H | -2.808319969 | -3.270046910 | -2.786437549 |
| H | -4.590610036 | -1.778558041 | -3.632313016 |

(<sup>3</sup>MLCT/<sup>3</sup>MC<sub>ax1</sub>)<sub>ts</sub> DFT B3LYP/DEF2-SVP CPCM.

|    |              |              |              |
|----|--------------|--------------|--------------|
| Ir | -0.180514000 | -0.215473000 | -0.040746000 |
| N  | 0.660428000  | -1.300930000 | -1.606500000 |
| N  | -0.621562000 | 1.339176000  | 1.553845000  |
| C  | 2.011156000  | -3.216094000 | -2.175387000 |
| C  | 1.552434000  | -2.283610000 | -1.230637000 |
| C  | 0.245114000  | -1.238564000 | -2.899773000 |
| C  | 1.918955000  | -2.240756000 | 0.177378000  |
| C  | 1.203991000  | -1.294774000 | 0.967097000  |
| C  | 1.515841000  | -1.201496000 | 2.335684000  |
| C  | 2.497326000  | -2.015377000 | 2.904793000  |
| C  | 3.190325000  | -2.953134000 | 2.119554000  |
| C  | 2.904065000  | -3.064052000 | 0.762509000  |

|   |              |              |              |
|---|--------------|--------------|--------------|
| C | -1.508488000 | 0.943770000  | 2.504840000  |
| C | -1.941917000 | 1.853249000  | 3.485798000  |
| C | -0.572817000 | 3.553341000  | 2.472866000  |
| C | -0.176454000 | 2.605666000  | 1.533917000  |
| C | -1.956257000 | -0.452994000 | 2.400468000  |
| C | -1.502688000 | -1.180558000 | 1.276076000  |
| C | -1.854734000 | -2.534061000 | 1.158726000  |
| C | -2.684046000 | -3.140710000 | 2.108180000  |
| C | -3.143081000 | -2.410842000 | 3.214681000  |
| C | -2.775975000 | -1.074220000 | 3.363608000  |
| H | 3.954368000  | -3.591104000 | 2.571230000  |
| H | 3.452536000  | -3.786561000 | 0.153301000  |
| H | 0.985679000  | -0.489138000 | 2.971328000  |
| H | 2.724651000  | -1.924813000 | 3.970937000  |
| H | -1.485995000 | -3.128620000 | 0.317424000  |
| H | -3.122167000 | -0.519929000 | 4.239171000  |
| H | -2.964563000 | -4.191862000 | 1.992592000  |
| H | -3.776380000 | -2.889723000 | 3.965890000  |
| H | -0.443306000 | -0.430462000 | -3.149232000 |
| C | 1.577159000  | -3.149246000 | -3.494360000 |
| H | 2.708989000  | -3.993829000 | -1.862721000 |
| H | 1.931830000  | -3.873756000 | -4.231013000 |
| C | 0.674814000  | -2.135205000 | -3.862310000 |
| H | 0.314781000  | -2.035286000 | -4.888033000 |
| C | -1.472259000 | 3.163049000  | 3.471327000  |
| H | 0.526701000  | 2.852420000  | 0.736819000  |
| H | -0.179150000 | 4.570080000  | 2.419301000  |
| H | -1.808134000 | 3.875900000  | 4.228616000  |
| H | -2.651916000 | 1.532489000  | 4.248388000  |
| C | -3.501143000 | 2.482714000  | -1.614970000 |
| C | 0.694000000  | 2.143366000  | -2.095497000 |
| C | 1.190281000  | 2.504946000  | -3.355885000 |
| C | 2.555783000  | 2.360981000  | -3.604122000 |
| C | 3.377302000  | 1.902211000  | -2.578910000 |
| C | 2.819245000  | 1.583875000  | -1.326036000 |
| N | 1.486264000  | 1.674508000  | -1.111399000 |
| H | 0.514668000  | 2.869593000  | -4.131074000 |
| H | 2.973481000  | 2.618759000  | -4.580339000 |
| H | 4.455604000  | 1.827815000  | -2.726176000 |
| C | -0.775621000 | 2.278743000  | -1.849299000 |
| C | -1.407124000 | 3.474233000  | -2.213364000 |
| C | -2.786529000 | 3.591128000  | -2.056147000 |
| C | -2.822181000 | 1.295668000  | -1.290710000 |
| N | -1.467059000 | 1.228134000  | -1.336040000 |
| H | -0.813372000 | 4.304462000  | -2.597749000 |
| H | -3.299520000 | 4.522701000  | -2.307097000 |
| H | -4.589843000 | 2.507985000  | -1.553653000 |
| C | 4.857737000  | 0.416923000  | -0.421473000 |
| C | 5.749219000  | 0.139680000  | 0.617741000  |
| C | 3.719706000  | 1.216552000  | -0.198841000 |
| H | 6.621085000  | -0.492337000 | 0.428514000  |
| C | 5.527880000  | 0.667887000  | 1.894955000  |
| C | 3.503097000  | 1.732755000  | 1.091518000  |
| H | 6.230388000  | 0.457860000  | 2.705977000  |
| H | 2.638332000  | 2.370077000  | 1.278346000  |
| C | 4.402353000  | 1.465934000  | 2.126964000  |
| H | 4.223877000  | 1.887414000  | 3.119895000  |
| H | 5.039407000  | -0.007146000 | -1.412089000 |



|   |              |              |              |
|---|--------------|--------------|--------------|
| C | -3.630564000 | 0.078427000  | -1.005947000 |
| C | -4.716809000 | 0.129557000  | -0.113656000 |
| H | -4.901416000 | 1.038230000  | 0.464917000  |
| C | -5.552698000 | -0.977938000 | 0.048977000  |
| H | -6.385897000 | -0.928241000 | 0.754984000  |
| C | -5.328158000 | -2.144316000 | -0.691943000 |
| H | -5.990160000 | -3.006126000 | -0.572186000 |
| C | -4.256099000 | -2.200921000 | -1.588466000 |
| H | -4.080450000 | -3.104604000 | -2.178090000 |
| C | -3.410415000 | -1.099471000 | -1.742628000 |
| H | -2.593392000 | -1.143982000 | -2.464632000 |

**(<sup>3</sup>MLCT/<sup>3</sup>MC<sub>eq 1</sub>)<sub>ts</sub>** DFT B3LYP/DEF2-SVP CPCM.

|    |              |              |              |
|----|--------------|--------------|--------------|
| Ir | -0.248744000 | 0.091252000  | -0.081826000 |
| N  | 1.804849000  | 0.940335000  | 1.374652000  |
| N  | -0.850063000 | 0.123563000  | 2.224530000  |
| N  | -0.471662000 | 2.119141000  | -0.378012000 |
| N  | -0.020126000 | -1.972823000 | 0.143695000  |
| C  | 4.029362000  | -0.546590000 | 0.134357000  |
| C  | 4.949731000  | -1.233860000 | -0.660404000 |
| C  | 5.651453000  | -0.560341000 | -1.666628000 |
| C  | 5.428080000  | 0.807208000  | -1.867759000 |
| C  | 4.514510000  | 1.496478000  | -1.067062000 |
| C  | 3.798129000  | 0.828996000  | -0.054361000 |
| C  | -5.019151000 | -0.752064000 | 0.713654000  |
| C  | -3.854519000 | -0.261453000 | 1.310480000  |
| C  | -5.329332000 | -2.114506000 | 0.788284000  |
| C  | -2.993890000 | -1.128094000 | 2.004540000  |
| C  | -4.472336000 | -2.986016000 | 1.470040000  |
| C  | -3.317946000 | -2.494230000 | 2.085671000  |
| C  | 2.903544000  | 1.567672000  | 0.874952000  |
| C  | 2.550751000  | 3.471890000  | 2.335754000  |
| C  | 1.492627000  | 2.774354000  | 2.922811000  |
| C  | 1.156324000  | 1.516393000  | 2.410965000  |
| C  | -1.856835000 | -0.581868000 | 2.799920000  |
| C  | -1.920105000 | -0.759740000 | 4.192706000  |
| C  | -0.971608000 | -0.162882000 | 5.016600000  |
| C  | 0.020994000  | 0.612961000  | 4.426549000  |
| C  | 0.059932000  | 0.729101000  | 3.030678000  |
| C  | 3.271583000  | 2.850432000  | 1.316655000  |
| C  | -0.685836000 | 4.836898000  | -1.010720000 |
| C  | 0.964581000  | -3.944974000 | 1.080807000  |
| C  | 0.134073000  | -4.745287000 | 0.283184000  |
| C  | 1.466757000  | 1.837010000  | -3.527327000 |
| C  | 2.103636000  | 0.797254000  | -4.194163000 |
| C  | 2.148761000  | -0.501468000 | -3.630849000 |
| C  | 1.550363000  | -0.747018000 | -2.402394000 |
| C  | 0.896822000  | 0.289244000  | -1.691998000 |
| C  | 0.867525000  | 1.613373000  | -2.268610000 |
| C  | -1.186957000 | 2.957114000  | 0.411272000  |
| C  | -1.315176000 | 4.307797000  | 0.137524000  |
| C  | 0.038655000  | 3.982839000  | -1.830474000 |
| C  | 0.150922000  | 2.616132000  | -1.511694000 |
| C  | -2.727930000 | -2.514183000 | -2.322160000 |
| C  | -3.613363000 | -1.691319000 | -3.019564000 |
| C  | -3.602354000 | -0.300503000 | -2.809273000 |
| C  | -2.700058000 | 0.267377000  | -1.910415000 |
| C  | -1.805553000 | -0.543164000 | -1.181841000 |

|   |              |              |              |
|---|--------------|--------------|--------------|
| C | -1.827381000 | -1.956385000 | -1.398232000 |
| C | 0.856132000  | -2.563156000 | 0.978730000  |
| C | -0.868778000 | -2.734678000 | -0.613309000 |
| C | -0.787567000 | -4.135396000 | -0.562691000 |
| H | 3.504189000  | -1.069669000 | 0.934548000  |
| H | 5.125457000  | -2.299361000 | -0.488219000 |
| H | 6.372440000  | -1.097048000 | -2.289245000 |
| H | 5.967201000  | 1.340741000  | -2.655269000 |
| H | 4.342664000  | 2.560881000  | -1.244121000 |
| H | -2.660401000 | -3.174679000 | 2.632985000  |
| H | -5.688122000 | -0.065254000 | 0.188891000  |
| H | -3.624952000 | 0.805411000  | 1.260793000  |
| H | -6.240352000 | -2.495953000 | 0.319262000  |
| H | -4.707327000 | -4.052031000 | 1.530844000  |
| H | 4.158435000  | 3.331283000  | 0.901137000  |
| H | 2.829132000  | 4.467183000  | 2.689766000  |
| H | 0.927465000  | 3.200415000  | 3.753347000  |
| H | -2.742746000 | -1.339450000 | 4.613395000  |
| H | -1.011356000 | -0.291930000 | 6.100953000  |
| H | 0.787309000  | 1.100352000  | 5.030286000  |
| H | 0.533361000  | 4.365269000  | -2.724644000 |
| H | -0.770078000 | 5.898556000  | -1.253298000 |
| H | -1.901706000 | 4.937864000  | 0.808584000  |
| H | -1.673924000 | 2.508044000  | 1.278401000  |
| H | 1.693130000  | -4.380421000 | 1.766810000  |
| H | 0.200457000  | -5.834905000 | 0.330398000  |
| H | -1.458224000 | -4.738578000 | -1.175594000 |
| H | 1.484069000  | -1.891159000 | 1.565621000  |
| H | 2.569126000  | 0.983123000  | -5.165831000 |
| H | 2.657696000  | -1.308461000 | -4.164339000 |
| H | 1.422329000  | 2.824644000  | -3.992570000 |
| H | 1.584454000  | -1.755448000 | -1.985243000 |
| H | -4.301100000 | 0.338272000  | -3.356783000 |
| H | -2.693035000 | 1.351211000  | -1.773311000 |
| H | -2.735741000 | -3.590622000 | -2.509530000 |
| H | -4.312675000 | -2.131095000 | -3.735270000 |

(<sup>3</sup>MC<sub>ax 1/S<sub>0</sub></sub>)<sub>stc-mecp</sub> DFT B3LYP/DEF2-SVP CPCM.

|    |              |              |              |
|----|--------------|--------------|--------------|
| Ir | -0.073940000 | -0.214818000 | 0.019566000  |
| N  | 1.168785000  | -1.255711000 | -1.511648000 |
| N  | -0.524772000 | 1.904730000  | 1.593238000  |
| C  | 2.667608000  | -3.090793000 | -1.832264000 |
| C  | 1.941253000  | -2.241175000 | -0.978522000 |
| C  | 1.096291000  | -1.086812000 | -2.843268000 |
| C  | 1.941325000  | -2.314395000 | 0.492334000  |
| C  | 1.122557000  | -1.378218000 | 1.186948000  |
| C  | 1.143258000  | -1.415672000 | 2.593712000  |
| C  | 1.922358000  | -2.344343000 | 3.290069000  |
| C  | 2.709944000  | -3.271322000 | 2.593513000  |
| C  | 2.720950000  | -3.251243000 | 1.199703000  |
| C  | -1.658878000 | 1.673151000  | 2.287027000  |
| C  | -2.257141000 | 2.708472000  | 3.034575000  |
| C  | -0.477713000 | 4.180479000  | 2.361006000  |
| C  | 0.046587000  | 3.112913000  | 1.632381000  |
| C  | -2.190481000 | 0.295826000  | 2.222904000  |
| C  | -1.591100000 | -0.636437000 | 1.339858000  |
| C  | -2.050830000 | -1.967203000 | 1.365292000  |
| C  | -3.094510000 | -2.366638000 | 2.203859000  |

|   |              |              |              |
|---|--------------|--------------|--------------|
| C | -3.703543000 | -1.435330000 | 3.053458000  |
| C | -3.248140000 | -0.119446000 | 3.061510000  |
| H | 3.315125000  | -4.002942000 | 3.135146000  |
| H | 3.345423000  | -3.969945000 | 0.663788000  |
| H | 0.532091000  | -0.709628000 | 3.160645000  |
| H | 1.912050000  | -2.350007000 | 4.384284000  |
| H | -1.590063000 | -2.717256000 | 0.716559000  |
| H | -3.711588000 | 0.590733000  | 3.749297000  |
| H | -3.427071000 | -3.408566000 | 2.196631000  |
| H | -4.517839000 | -1.736899000 | 3.717383000  |
| H | 0.460223000  | -0.272333000 | -3.198395000 |
| C | 2.593119000  | -2.917822000 | -3.211461000 |
| H | 3.286061000  | -3.884901000 | -1.413982000 |
| H | 3.155469000  | -3.577975000 | -3.876755000 |
| C | 1.793587000  | -1.894078000 | -3.735176000 |
| H | 1.710283000  | -1.721176000 | -4.809612000 |
| C | -1.662931000 | 3.966925000  | 3.071083000  |
| H | 0.966232000  | 3.240524000  | 1.056489000  |
| H | 0.030430000  | 5.146919000  | 2.363987000  |
| H | -2.121346000 | 4.773895000  | 3.648791000  |
| H | -3.183544000 | 2.531988000  | 3.581032000  |
| C | -3.688040000 | 1.772176000  | -1.864601000 |
| C | 0.482520000  | 2.408416000  | -1.672569000 |
| C | 1.033020000  | 3.340830000  | -2.563520000 |
| C | 2.417187000  | 3.465186000  | -2.643774000 |
| C | 3.206105000  | 2.673093000  | -1.818634000 |
| C | 2.602885000  | 1.760542000  | -0.932040000 |
| N | 1.257070000  | 1.623913000  | -0.888805000 |
| H | 0.388057000  | 3.935923000  | -3.209215000 |
| H | 2.872455000  | 4.175983000  | -3.337528000 |
| H | 4.292497000  | 2.768133000  | -1.827585000 |
| C | -0.995392000 | 2.227996000  | -1.638586000 |
| C | -1.843445000 | 3.296057000  | -1.956385000 |
| C | -3.215571000 | 3.068537000  | -2.035050000 |
| C | -2.793552000 | 0.736759000  | -1.538583000 |
| N | -1.474200000 | 0.993918000  | -1.350977000 |
| H | -1.437055000 | 4.292709000  | -2.126207000 |
| H | -3.902195000 | 3.886784000  | -2.264565000 |
| H | -4.744286000 | 1.543664000  | -2.009211000 |
| C | 4.644462000  | 0.367330000  | -0.534685000 |
| C | 5.578511000  | -0.226033000 | 0.317692000  |
| C | 3.503537000  | 1.007724000  | -0.013644000 |
| H | 6.452992000  | -0.729858000 | -0.102736000 |
| C | 5.399212000  | -0.167132000 | 1.704648000  |
| C | 3.322773000  | 1.043438000  | 1.378966000  |
| H | 6.137748000  | -0.617169000 | 2.373567000  |
| H | 2.449466000  | 1.541604000  | 1.801331000  |
| C | 4.271292000  | 0.470605000  | 2.230858000  |
| H | 4.124430000  | 0.521806000  | 3.312616000  |
| H | 4.798099000  | 0.328001000  | -1.616143000 |
| C | -3.299637000 | -0.660896000 | -1.497563000 |
| C | -4.569999000 | -0.949748000 | -0.965151000 |
| H | -5.152669000 | -0.159612000 | -0.485866000 |
| C | -2.567890000 | -1.701412000 | -2.099249000 |
| H | -1.600433000 | -1.488609000 | -2.554319000 |
| C | -3.086936000 | -2.997361000 | -2.156170000 |
| H | -2.508703000 | -3.790481000 | -2.637783000 |
| C | -5.084596000 | -2.246792000 | -1.016612000 |

|   |              |              |              |
|---|--------------|--------------|--------------|
| H | -6.067550000 | -2.455877000 | -0.586222000 |
| C | -4.345712000 | -3.275581000 | -1.612376000 |
| H | -4.752415000 | -4.289446000 | -1.657436000 |

**(<sup>3</sup>MC<sub>eq 1</sub>/S<sub>0</sub>)<sub>stc-mecp</sub> DFT B3LYP/DEF2-SVP CPCM.**

|    |              |              |              |
|----|--------------|--------------|--------------|
| Ir | -0.655870000 | 0.254485000  | -0.478704000 |
| N  | 2.498080000  | 0.339685000  | 1.441016000  |
| N  | -0.097333000 | -1.733074000 | -0.744764000 |
| N  | -1.227207000 | 2.266177000  | -0.329728000 |
| C  | -0.795581000 | 4.514489000  | -1.045788000 |
| C  | -0.480715000 | 3.147358000  | -1.059671000 |
| C  | -2.254661000 | 2.713841000  | 0.417257000  |
| C  | 0.629634000  | 2.534673000  | -1.801747000 |
| C  | 0.860174000  | 1.149147000  | -1.554362000 |
| C  | 1.902414000  | 0.512831000  | -2.255481000 |
| C  | 2.700347000  | 1.223897000  | -3.158315000 |
| C  | 2.466819000  | 2.587531000  | -3.386839000 |
| C  | 1.432486000  | 3.241152000  | -2.713170000 |
| C  | -0.989258000 | -2.510612000 | -1.425092000 |
| C  | -0.680518000 | -3.849941000 | -1.703178000 |
| C  | 1.404622000  | -3.585146000 | -0.527845000 |
| C  | 1.057763000  | -2.258044000 | -0.294310000 |
| C  | -2.241434000 | -1.827290000 | -1.778407000 |
| C  | -2.403593000 | -0.507702000 | -1.259062000 |
| C  | -3.587982000 | 0.187611000  | -1.571194000 |
| C  | -4.584866000 | -0.403576000 | -2.354032000 |
| C  | -4.413066000 | -1.701497000 | -2.856551000 |
| C  | -3.243250000 | -2.409756000 | -2.573382000 |
| H  | 3.087488000  | 3.140150000  | -4.096831000 |
| H  | 1.251683000  | 4.300404000  | -2.910839000 |
| H  | 2.105918000  | -0.549089000 | -2.098903000 |
| H  | 3.508890000  | 0.712589000  | -3.688816000 |
| H  | -3.748047000 | 1.203522000  | -1.202272000 |
| H  | -3.115225000 | -3.414965000 | -2.982385000 |
| H  | -5.500850000 | 0.151181000  | -2.577451000 |
| H  | -5.189719000 | -2.158943000 | -3.474800000 |
| H  | -2.816356000 | 1.961550000  | 0.973776000  |
| C  | -1.859388000 | 4.975173000  | -0.274081000 |
| H  | -0.199200000 | 5.212942000  | -1.633352000 |
| H  | -2.106002000 | 6.039568000  | -0.256887000 |
| C  | -2.601997000 | 4.059020000  | 0.478332000  |
| H  | -3.442473000 | 4.372053000  | 1.099952000  |
| C  | 0.523386000  | -4.390707000 | -1.257154000 |
| H  | 1.701342000  | -1.580033000 | 0.271963000  |
| H  | 2.352050000  | -3.968397000 | -0.145738000 |
| H  | 0.768088000  | -5.434625000 | -1.468061000 |
| H  | -1.390798000 | -4.466212000 | -2.254851000 |
| C  | -1.831943000 | 0.580816000  | 3.833349000  |
| C  | 1.747743000  | 1.414949000  | 1.714607000  |
| C  | 2.197756000  | 2.725905000  | 1.496199000  |
| C  | 3.476983000  | 2.904741000  | 0.966790000  |
| C  | 4.260275000  | 1.786524000  | 0.691579000  |
| C  | 3.735303000  | 0.502891000  | 0.942972000  |
| H  | 1.559040000  | 3.579808000  | 1.728515000  |
| H  | 3.864124000  | 3.909898000  | 0.781409000  |
| H  | 5.275906000  | 1.905620000  | 0.311484000  |
| C  | 0.437055000  | 1.169470000  | 2.397913000  |
| C  | 0.189637000  | 1.841168000  | 3.601668000  |

|   |              |              |              |
|---|--------------|--------------|--------------|
| C | -0.974706000 | 1.564176000  | 4.315568000  |
| C | -1.539131000 | -0.066865000 | 2.621668000  |
| N | -0.448476000 | 0.276465000  | 1.888605000  |
| H | 0.924212000  | 2.552762000  | 3.981155000  |
| H | -1.188554000 | 2.079950000  | 5.254929000  |
| H | -2.716918000 | 0.282219000  | 4.397050000  |
| C | 5.528619000  | -0.771773000 | -0.301516000 |
| C | 6.280832000  | -1.931182000 | -0.510575000 |
| C | 4.540936000  | -0.727302000 | 0.700892000  |
| H | 7.036439000  | -1.950269000 | -1.300632000 |
| C | 6.064702000  | -3.064254000 | 0.281719000  |
| C | 4.329686000  | -1.875095000 | 1.489050000  |
| H | 6.656131000  | -3.969411000 | 0.119516000  |
| H | 3.571404000  | -1.845522000 | 2.274269000  |
| C | 5.086754000  | -3.031057000 | 1.283536000  |
| H | 4.916512000  | -3.909163000 | 1.912609000  |
| H | 5.698543000  | 0.097412000  | -0.941174000 |
| C | -2.416634000 | -1.189509000 | 2.188351000  |
| C | -1.864677000 | -2.459529000 | 1.943982000  |
| H | -0.783592000 | -2.598882000 | 2.006149000  |
| C | -3.814700000 | -1.034633000 | 2.154505000  |
| H | -4.256372000 | -0.054580000 | 2.352937000  |
| C | -4.640438000 | -2.120285000 | 1.852541000  |
| H | -5.724308000 | -1.982861000 | 1.814595000  |
| C | -2.693963000 | -3.547175000 | 1.657538000  |
| H | -2.252774000 | -4.531718000 | 1.481849000  |
| C | -4.082389000 | -3.380013000 | 1.605125000  |
| H | -4.729338000 | -4.231790000 | 1.378804000  |
